# Supplementary material for: Electrochemically enabled dearomative [2 + 2] cycloadditions of indoles with alkynes to access cyclobutene-fused indolines
Source: Royal Society of Chemistry journal article supplement (doi:10.1039/d4gc04126g), 2024-01-01
Supplement: d4gc04126g1.pdf [file d4gc04126g1.pdf]

## **Electrochemically enabled dearomative [2+2] cycloadditions of indoles with alkynes to access cyclobutene-fused indolines**

Jingjing Zi, Huiling Tang, Dongyin Wang, Meng Li, Yuxiang Zhou, Sihui Lv,  
Deqiang Liang,\* and Lou Shi\*

Yunnan Key Laboratory of Metal-Organic Molecular Materials and Device, School of  
Chemistry and Chemical Engineering, Kunming University, Kunming 650214, China

\*Email: shil090@nenu.edu.cn

\*Email: liangdq695@nenu.edu.cn

## Table of Contents

|                                                                             |            |
|-----------------------------------------------------------------------------|------------|
| <b>I. General considerations.....</b>                                       | <b>S3</b>  |
| <b>II. Optimization of reaction condition .....</b>                         | <b>S4</b>  |
| <b>III. Experimental procedures.....</b>                                    | <b>S8</b>  |
| 1. General procedure of for the synthesis of <b>3</b> .....                 | S8         |
| 2. Gram-scale synthesis.....                                                | S9         |
| <b>IV. Mechanistic investigations.....</b>                                  | <b>S10</b> |
| 1. Quenching experiments.....                                               | S10        |
| 2. Electricity on-off experiments.....                                      | S10        |
| 3. Reaction kinetic profiles.....                                           | S11        |
| 4. Cyclic voltammetry studies.....                                          | S12        |
| <b>V. Spectral data of products <b>3</b> .....</b>                          | <b>S13</b> |
| <b>VI. General procedure for the synthesis of substrates <b>1</b> .....</b> | <b>S28</b> |
| <b>VII. Crystallographic Data .....</b>                                     | <b>S31</b> |
| <b>VIII. Copies of NMR spectra .....</b>                                    | <b>S32</b> |
| <b>IX. References .....</b>                                                 | <b>S99</b> |

## I. General considerations

Unless otherwise stated, commercially available chemicals were used without treatment. Solvents were degassed by bubbling Ar for 10 min before use. Reactions were monitored by Thin Layer Chromatography (TLC) using silica gel F254 plates. Products were purified by column chromatography over 300-400 mesh silica gel under a positive pressure of air.  $^1\text{H}$  NMR,  $^{13}\text{C}$  NMR,  $^{19}\text{F}$  NMR, and DEPT NMR spectra were recorded at 25 °C on a Bruker Ascend™ 400 spectrometer using tetramethylsilane (TMS) as an internal standard. High-resolution mass spectra (HRMS) were obtained using a Bruker microTOF II Focus spectrometer (ESI). Electrolysis was performed using a DJS-292B dual display potentiostat (Shanghai Xinrui Instruments Co., China). The indole derivatives used as substrates were synthesized following established methods, and their NMR data were consistent with the literature.<sup>1-4</sup> The electrochemical setup used in this research is shown in Figure S1.

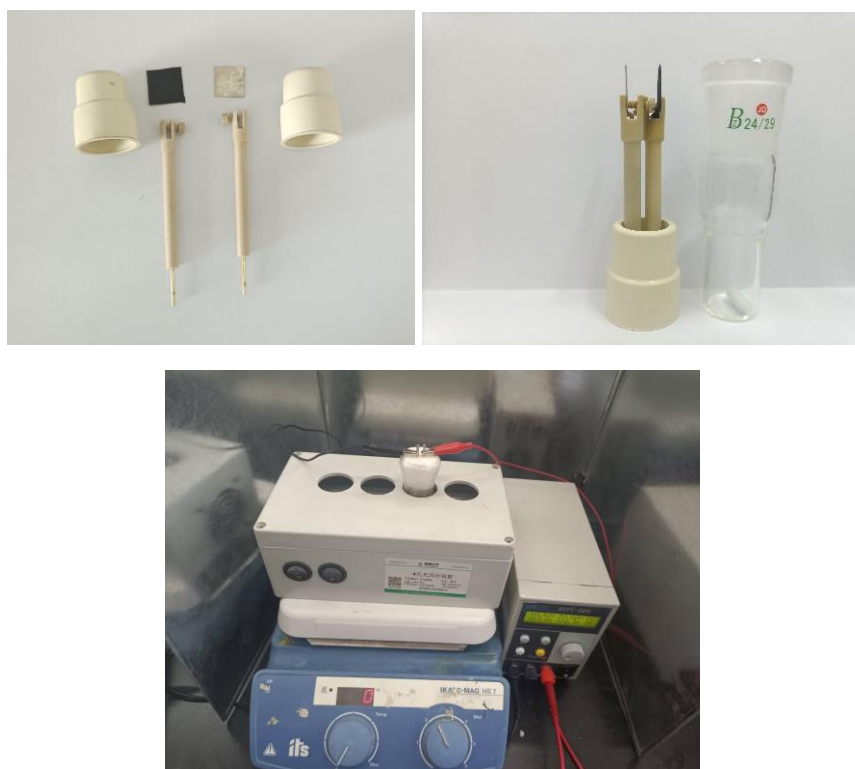

**Figure S1** Electrochemical setup

## II. Optimization of reaction condition

**Table S1** Solvent screening.<sup>a</sup>

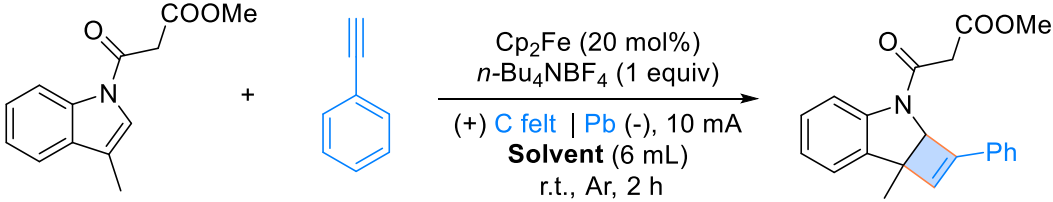

**1a:** 0.5 mmol      **2a:** 1.0 mmol      **3a**

| Entry     | Solvent                            | Yield (%) <sup>b</sup> |
|-----------|------------------------------------|------------------------|
| 1         | DCE                                | 0%                     |
| 2         | MeCN                               | 0%                     |
| 3         | MeNO <sub>2</sub>                  | 0%                     |
| 4         | acetone                            | 0%                     |
| 5         | THF                                | 0%                     |
| 6         | 1,4-dioxane                        | 0%                     |
| 7         | DMF                                | 0%                     |
| 8         | DMA                                | 0%                     |
| 9         | DMSO                               | 0%                     |
| 10        | MeOH                               | 0%                     |
| 11        | CF <sub>3</sub> CH <sub>2</sub> OH | 0%                     |
| <b>12</b> | <b>HFIP</b>                        | <b>16%</b>             |

<sup>a</sup> Reaction conditions: undivided cell, carbon felt anode, Pb cathode, electrodes (15 mm × 15 mm × 0.3 mm), constant current electrolysis at 10.0 mA, **1a** (0.5 mmol), **2a** (1.0 mmol), *n*-Bu<sub>4</sub>NOAc (0.5 mmol), Cp<sub>2</sub>Fe (0.1 mmol, 0.2 equiv), solvent (6.0 mL), under argon, room temperature, 2 h. <sup>b</sup> <sup>1</sup>H NMR yield with isoquinoline as an internal standard.

**Table S2** Base screening.<sup>a</sup>

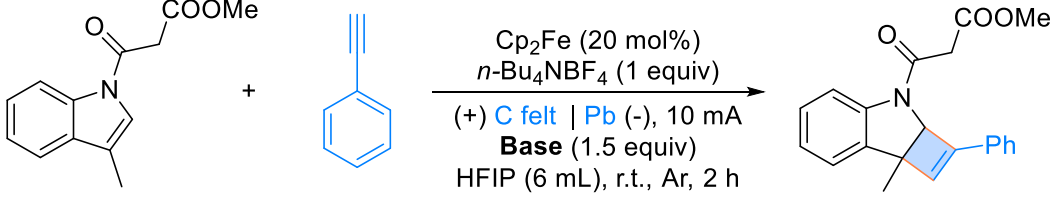

**1a:** 0.5 mmol      **2a:** 1.0 mmol      **3a**

| Entry | Base  | Yield (%) <sup>b</sup> |
|-------|-------|------------------------|
| 1     | none  | 16                     |
| 2     | KOAc  | 7                      |
| 3     | NaOAc | 1                      |

|    |                                 |    |
|----|---------------------------------|----|
| 4  | NaOAc                           | 6  |
| 5  | NaHCO <sub>3</sub>              | 0  |
| 6  | KHCO <sub>3</sub>               | 0  |
| 7  | KF                              | 6  |
| 8  | Cs <sub>2</sub> CO <sub>3</sub> | 3  |
| 9  | K <sub>2</sub> CO <sub>3</sub>  | 1  |
| 10 | Na <sub>2</sub> CO <sub>3</sub> | 3  |
| 11 | Li <sub>2</sub> CO <sub>3</sub> | 15 |
| 12 | K <sub>2</sub> HPO <sub>4</sub> | 6  |
| 13 | K <sub>3</sub> PO <sub>4</sub>  | 2  |
| 14 | KOH                             | 0  |
| 15 | <i>t</i> -BuOK                  | 8  |
| 16 | <i>t</i> -BuONa                 | 4  |
| 17 | <i>t</i> -BuOLi                 | 2  |
| 18 | DABCO                           | 0  |
| 19 | DBU                             | 0  |

<sup>a</sup> Reaction conditions: undivided cell, carbon felt anode, Pb cathode, electrodes (15 mm × 15 mm × 0.3 mm), constant current electrolysis at 10.0 mA, **1a** (0.5 mmol), **2a** (1.0 mmol), *n*-Bu<sub>4</sub>NOAc (0.5 mmol), base (0.45 mmol, 1.5 equiv), Cp<sub>2</sub>Fe (0.1 mmol, 0.2 equiv), HFIP (6.0 mL), under argon, room temperature, 2 h. <sup>b</sup> <sup>1</sup>H NMR yield with isoquinoline as an internal standard.

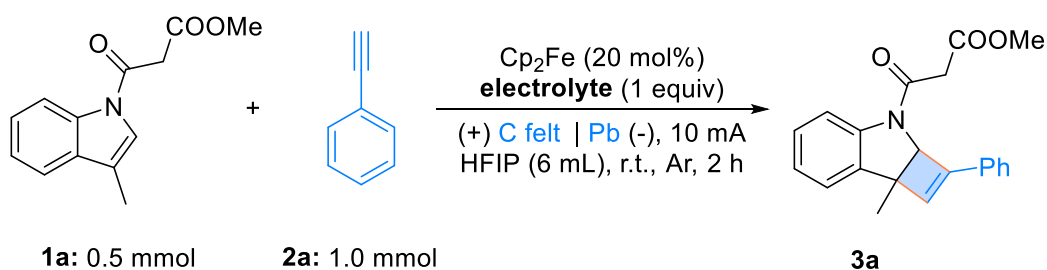

**Table S3** electrolyte screening.<sup>a</sup>

| Entry    | Electrolyte                                   | Yield (%) <sup>b</sup> |
|----------|-----------------------------------------------|------------------------|
| 1        | none                                          | 0                      |
| 2        | LiClO <sub>4</sub>                            | 0                      |
| 3        | KPF <sub>6</sub>                              | 0                      |
| <b>4</b> | <b><i>n</i>-Bu<sub>4</sub>NBF<sub>4</sub></b> | <b>10</b>              |
| 5        | <i>n</i> -Et <sub>4</sub> NBF <sub>4</sub>    | 5                      |
| 6        | <i>n</i> -Bu <sub>4</sub> NPF <sub>6</sub>    | 0                      |
| 7        | <i>n</i> -Bu <sub>4</sub> NOAc                | 0                      |
| 8        | <i>n</i> -Bu <sub>4</sub> NCIO <sub>4</sub>   | 0                      |
| 9        | TBAI                                          | 0                      |

<sup>a</sup> Reaction conditions: undivided cell, carbon felt anode, Pb cathode, electrodes (15 mm × 15 mm × 0.3 mm), constant current electrolysis at 10.0 mA, **1a** (0.5 mmol), **2a** (1.0 mmol), electrolyte (0.5 mmol), Cp<sub>2</sub>Fe (0.1 mmol, 0.2 equiv), HFIP (6.0 mL),

under argon, room temperature, 2 h. <sup>b</sup> <sup>1</sup>H NMR yield with isoquinoline as an internal standard.

**Table S4** Optimization of mediator.<sup>a</sup>

**1a:** 0.5 mmol      **2a:** 1.0 mmol      **3a**

| Entry | Mediator           | Yield (%) <sup>b</sup> |
|-------|--------------------|------------------------|
| 1     | Cp <sub>2</sub> Fe | 16                     |
| 2     | TEMPO              | 20                     |
| 3     | NHPI               | 54                     |
| 4     | TBAI               | 2                      |
| 5     | TBAB               | 40                     |
| 6     | DDQ                | 7                      |
| 7     | Ph <sub>3</sub> N  | 6                      |
| 8     | none               | <b>54</b>              |

<sup>a</sup> Reaction conditions: undivided cell, carbon felt anode, Pb cathode, electrodes (15 mm × 15 mm × 0.3 mm), constant current electrolysis at 10.0 mA, **1a** (0.5 mmol), **2a** (1.0 mmol), *n*-Bu<sub>4</sub>NOAc (0.5 mmol), mediator (0.1 mmol, 0.2 equiv), HFIP (6.0 mL), under argon, room temperature, 2 h. <sup>b</sup> <sup>1</sup>H NMR yield with isoquinoline as an internal standard.

**Table S5** Optimization of electrodes.<sup>a</sup>

**1a:** 0.5 mmol      **2a:** 1.0 mmol      **3a**

| Entry | Anode/Cathode   | Yield (%) <sup>b</sup> |
|-------|-----------------|------------------------|
| 1     | Pt/Pb           | 3                      |
| 2     | C cloth/Pb      | 58                     |
| 3     | C felt/Pb       | 25                     |
| 4     | C rod/Pb        | 19                     |
| 5     | C RVC/Pb        | 52                     |
| 6     | C cloth/Pt      | <b>61</b>              |
| 7     | C cloth/Ni      | 13                     |
| 8     | C cloth/Ni foam | 51                     |

|    |                         |    |
|----|-------------------------|----|
| 9  | C cloth/Stainless steel | 60 |
| 10 | C cloth/C cloth         | 52 |
| 11 | C cloth/C felt          | 54 |
| 12 | C cloth/C rod           | 49 |
| 13 | C cloth/Zn              | 47 |
| 14 | C cloth/Fe              | 4  |

<sup>a</sup> Reaction conditions: undivided cell, electrodes (15 mm × 15 mm × 0.3 mm), constant current electrolysis at 10.0 mA, **1a** (0.5 mmol), **2a** (1.0 mmol), *n*-Bu<sub>4</sub>NOAc (0.3 mmol), HFIP (6.0 mL), under argon, room temperature, 2 h. <sup>b</sup> <sup>1</sup>H NMR yield with isoquinoline as an internal standard.

**Table S6** Optimization of constant current.<sup>a</sup>

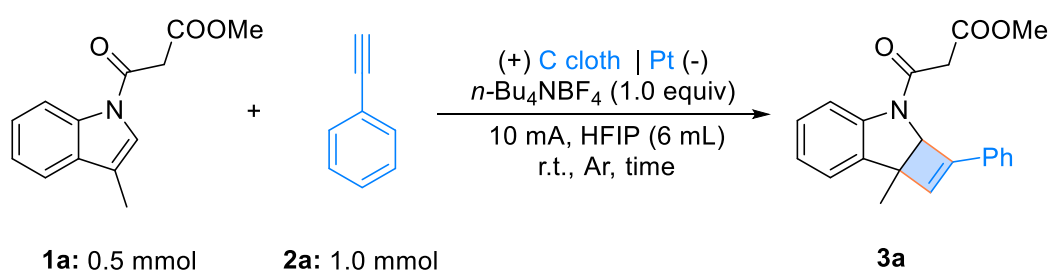

| Entry | Constant current (mA), reaction time | Yield (%) <sup>b</sup> |
|-------|--------------------------------------|------------------------|
| 1     | 0 mA, 24 h                           | NR                     |
| 2     | 2 mA, 8 h                            | 45                     |
| 3     | 4 mA, 4.0 h                          | 51                     |
| 4     | 5 mA, 3.2 h                          | 52                     |
| 5     | 7.5 mA, 2.7 h                        | 57                     |
| 6     | 10 mA, 2.0 h                         | 61                     |
| 7     | 12.5 mA, 1.6 h                       | 61                     |

<sup>a</sup> Reaction conditions: undivided cell, carbon cloth anode (15 mm × 15 mm × 0.33 mm), Pt cathode (15 mm × 15 mm × 0.3 mm), **1a** (0.5 mmol), **2a** (1.0 mmol), *n*-Bu<sub>4</sub>NOAc (0.5 mmol), HFIP (6.0 mL), under argon, room temperature. <sup>b</sup> <sup>1</sup>H NMR yield with isoquinoline as an internal standard.

**Table S7** Optimization of substrate loading.<sup>a</sup>

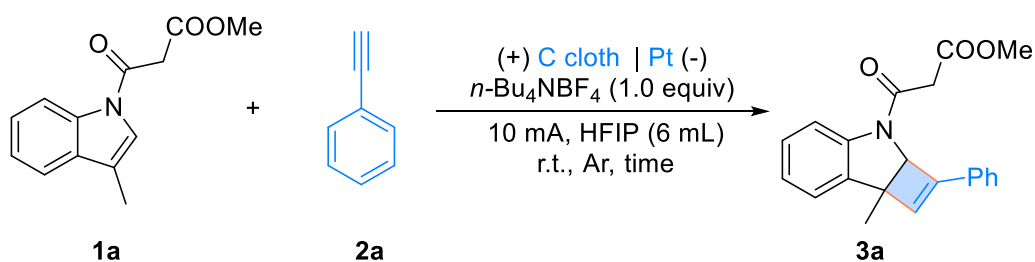

| Entry | <b>1a/2a</b> (mmol) | Yield (%) <sup>b</sup> |
|-------|---------------------|------------------------|
| 1     | 0.5:0.5             | 53%                    |
| 2     | 0.5:0.55            | 58%                    |

|          |                 |            |
|----------|-----------------|------------|
| 3        | 0.5:0.6         | 62%        |
| 4        | 0.5:0.65        | 59%        |
| 5        | 0.5:0.75        | 62%        |
| 6        | 0.5:0.9         | 61%        |
| 7        | 0.5:1.0         | 60%        |
| 8        | 0.6:0.5         | 62%        |
| <b>9</b> | <b>0.75:0.5</b> | <b>68%</b> |
| 10       | 0.9:0.5         | 69%        |
| 11       | 1.0:0.5         | 69%        |

<sup>a</sup> Reaction conditions: undivided cell, carbon cloth anode (15 mm × 15 mm × 0.33 mm), Pt cathode, electrodes (15 mm × 15 mm × 0.33 mm), *n*-Bu<sub>4</sub>NOAc (0.5 mmol), HFIP (6.0 mL), under argon, room temperature, 2 h. <sup>b</sup> <sup>1</sup>H NMR yield with isoquinoline as an internal standard.

**Table S8** Optimization of electrolyte loading.<sup>a</sup>

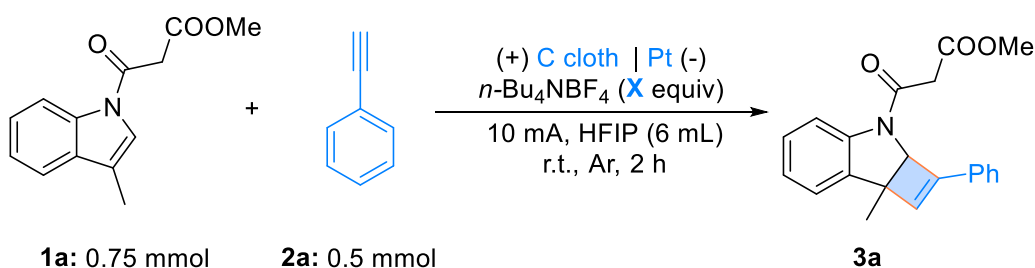

| Entry    | Electrolyte ( <b>X</b> equiv)                             | Yield (%) <sup>b</sup> |
|----------|-----------------------------------------------------------|------------------------|
| 1        | none                                                      | 0                      |
| 2        | <i>n</i> -Bu <sub>4</sub> NBF <sub>4</sub> (0.015 equiv)  | 44                     |
| 3        | <i>n</i> -Bu <sub>4</sub> NBF <sub>4</sub> (0.15 equiv)   | 60                     |
| <b>4</b> | <b><i>n</i>-Bu<sub>4</sub>NBF<sub>4</sub> (0.3 equiv)</b> | <b>76</b>              |
| 5        | <i>n</i> -Bu <sub>4</sub> NBF <sub>4</sub> (0.45 equiv)   | 70                     |
| 6        | <i>n</i> -Bu <sub>4</sub> NBF <sub>4</sub> (0.6 equiv)    | 60                     |
| 7        | <i>n</i> -Bu <sub>4</sub> NBF <sub>4</sub> (0.3 equiv)    | 62 <sup>c</sup>        |

<sup>a</sup> Reaction conditions: undivided cell, carbon cloth anode (15 mm × 15 mm × 0.33 mm), Pt cathode, electrodes (15 mm × 15 mm × 0.3 mm), HFIP (6.0 mL), under argon, room temperature, 2 h. <sup>b</sup> <sup>1</sup>H NMR yield with isoquinoline as an internal standard. <sup>c</sup>The reaction was run under an air atmosphere.

### III. Experimental procedures

#### 1. General procedure of for the synthesis of 3



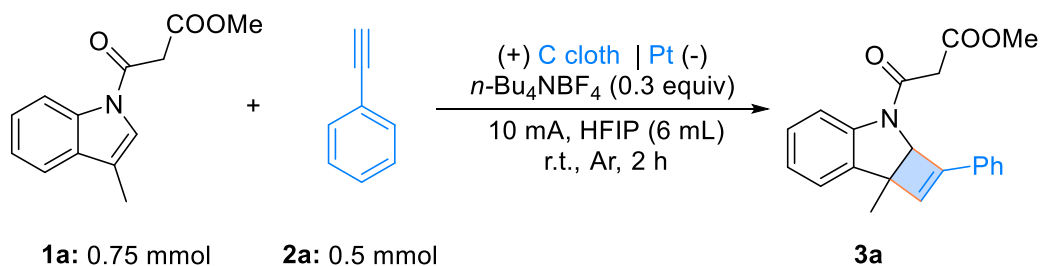

A custom-made undivided cell, equipped with a magnetic stirring bar, a C cloth anode (15 mm × 15 mm × 0.33 mm) and a Pt cathode (15 mm × 15 mm × 0.3 mm, carefully polished until shining), was charged with substrate **1** (1.5 equiv, 0.75 mmol), electrolyte *n*-Bu<sub>4</sub>NOAc (0.3 equiv, 0.15 mmol, 49.4 mg), alkyne **2** (1.0 equiv, 0.5 mmol), and HFIP (6.0 mL). The mixture was electrolyzed with stirring using a constant current of 10.0 mA at room temperature for 2 hours. When the reaction was complete, ethyl acetate (10 mL) was added, and the solvent was removed under low pressure. The residue obtained after evaporation of the solvent was purified by column chromatography on silica gel to afford product **3**.

## 2. Gram-scale synthesis

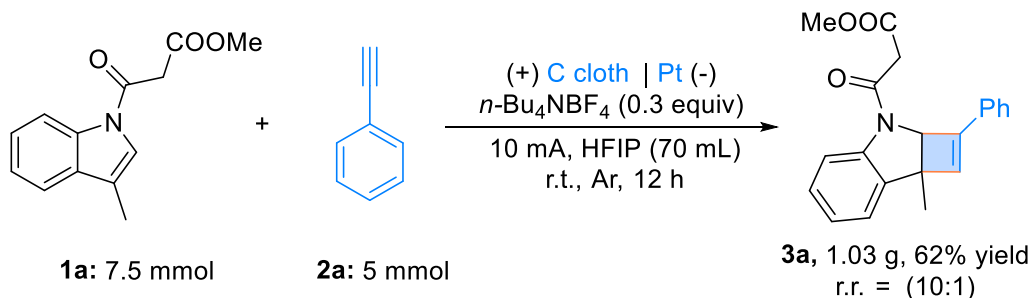

A 100-mL double-neck round-bottom flask, a C cloth anode (15 mm × 15 mm × 0.33 mm) and a Pt cathode (15 mm × 15 mm × 0.3 mm, carefully polished until shining), was charged with substrate **1a** (1.5 equiv, 7.5 mmol), electrolyte *n*-Bu<sub>4</sub>NOAc (0.3 equiv, 1.5 mmol, 494.0 mg), alkyne **2a** (1.0 equiv, 5.0 mmol), and HFIP (70.0 mL). The mixture was electrolyzed with stirring using a constant current of 10.0 mA at room temperature for **12 hours**. When the reaction was complete, ethyl acetate (10 mL) was added, and the solvent was removed under low pressure. The residue obtained after evaporation of the solvent was purified by column chromatography on silica gel to afford product **3a** (1.03 g, 62% yield).

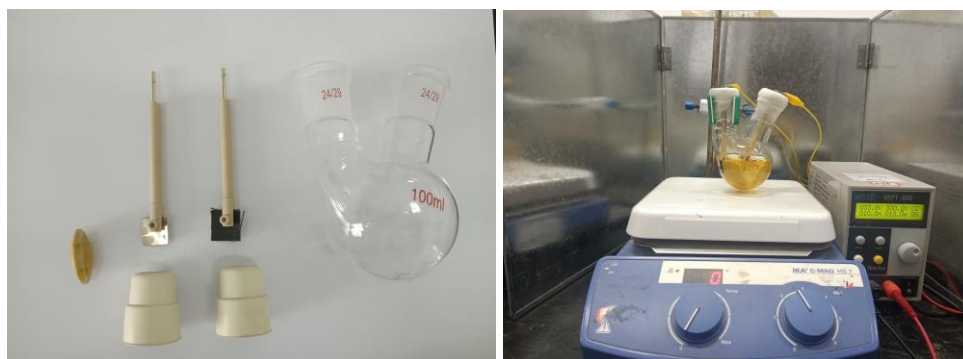

Figure S2 Setup for gram-scale synthesis

## IV. Mechanistic investigations

### 1. Quenching experiments

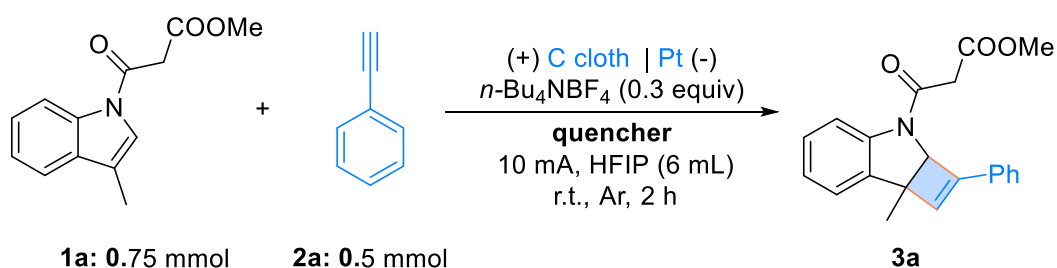

A custom-made undivided cell, equipped with a magnetic stirring bar, a C cloth anode (15 mm × 15 mm × 0.33 mm), and a Pt cathode (15 mm × 15 mm × 0.3 mm, carefully polished until shining), was charged with substrate **1a** (1.5 equiv, 0.75 mmol), electrolyte *n*-Bu<sub>4</sub>NOAc (0.3 equiv, 0.15 mmol, 49.4 mg), alkyne **2a** (1.0 equiv, 0.5 mmol), a **quencher**, and HFIP (6.0 mL). The mixture was electrolyzed with stirring using a constant current of 10.0 mA at room temperature for 2 hours. The yield of product **3a** formed was determined by <sup>1</sup>H NMR analysis based on an isoquinoline internal standard.

### 2. Electricity on-off experiments

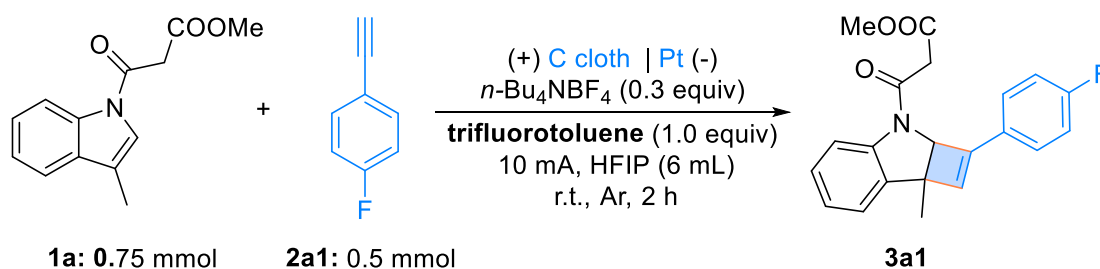

Trifluorotoluene (1 equiv) was added as an internal standard to the reaction mixture before electrolysis, 0.1 mL of the crude reaction solution was taken out each time via a syringe and was subjected to  $^{19}\text{F}$  NMR analysis.

|           | A(X) | B(Y)                      |
|-----------|------|---------------------------|
| Long Name | time | $^{19}\text{F}$ NMR Yield |
| Units     | min  | %                         |
| Comments  |      |                           |
| F(x)=     |      | Electricity on/off        |
| 1         | 0    | 0                         |
| 2         | 20   | 17.02                     |
| 3         | 40   | 17.6                      |
| 4         | 60   | 27.58                     |
| 5         | 80   | 28.18                     |
| 6         | 100  | 33.6                      |
| 7         | 120  | 34.4                      |

**Figure S3** Electricity on-off experiments

### 3. Reaction kinetic profiles

Benzotrifluoride (1 equiv) was added as an internal standard to the reaction mixture before electrolysis using 4-(Trifluoromethyl)benzenesulfonyl chloride as the radical precursor. 0.05 mL of the crude reaction solution was taken out each time via a syringe and was subjected to  $^1\text{H}$  NMR analysis.

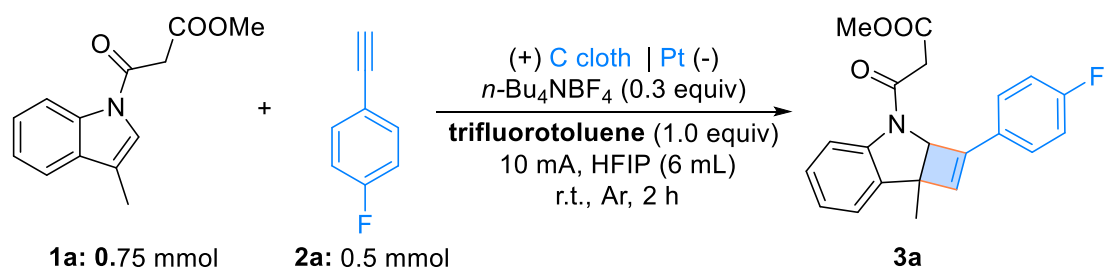

| Long Name | time | $^1\text{H}$ NMR Yield of 3a1 | $^1\text{H}$ NMR remaining amount of 2a1 | $^1\text{H}$ NMR remaining amount of 1a |
|-----------|------|-------------------------------|------------------------------------------|-----------------------------------------|
| Units     | min  | %                             | %                                        | %                                       |
| Comments  |      |                               |                                          |                                         |
| F(x)=     |      |                               |                                          |                                         |
| 1         | 0    | 0                             | 100                                      | 150                                     |
| 2         | 20   | 24                            | 71                                       | 112                                     |
| 3         | 40   | 43                            | 38                                       | 90                                      |
| 4         | 60   | 47                            | 29                                       | 80                                      |
| 5         | 80   | 56                            | 16                                       | 38                                      |
| 6         | 100  | 61                            | 9                                        | 36                                      |
| 7         | 120  | 62                            | 3                                        | 27                                      |

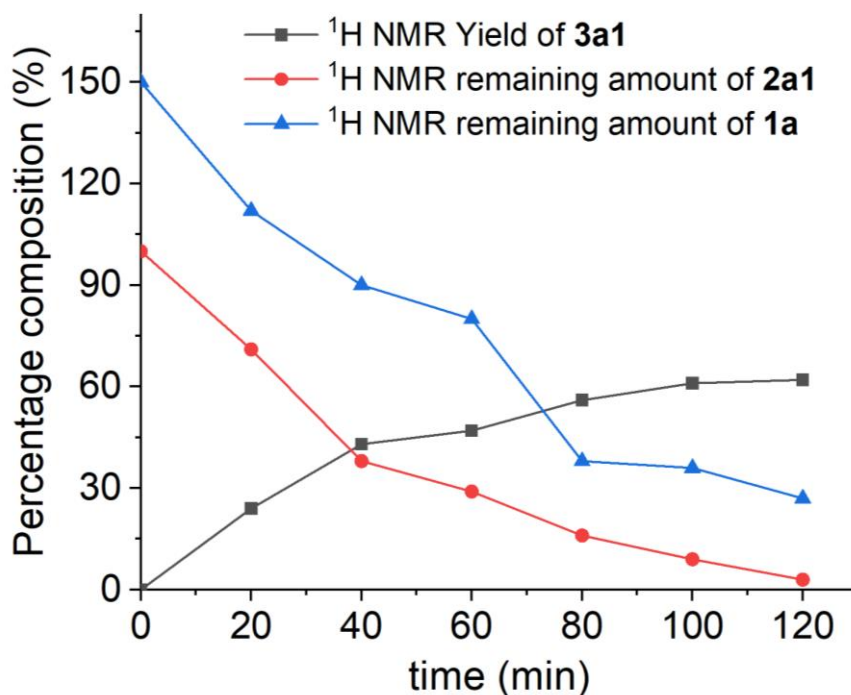

**Figure S4** Reaction kinetic profiles

#### 4. Cyclic voltammetry studies

General procedure: Cyclic voltammeteries were performed in a three-electrode cell at room temperature. The working electrode was a glassy carbon (GC,  $d = 3$  mm) disk electrode, and the counter electrode was a platinum wire. The reference was an Ag/AgCl electrode submerged in a saturated aqueous KCl solution, and separated from reactions by a salt bridge. 10 mL solution containing 0.1 mmol  $n\text{-Bu}_4\text{NBF}_4$  was poured into the electrochemical cell in all experiments under argon. The scan rate was 0.05 V/s.

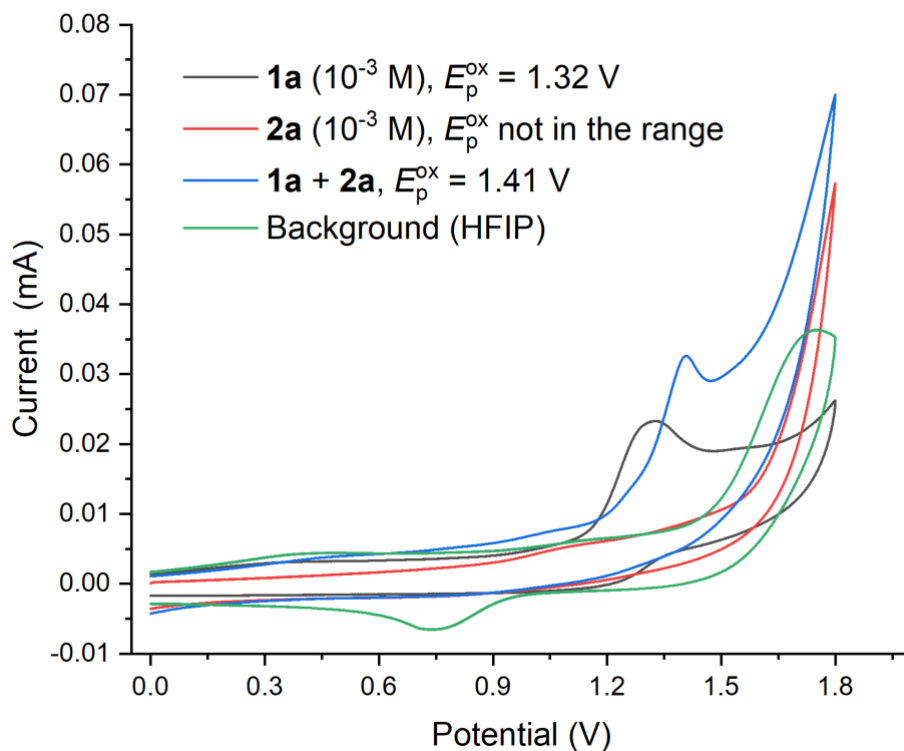

**Figure S5** Anodic voltammograms of **1a** and **2a** ( $10^{-3}$  M) in HFIP.

## V. Spectral data of products

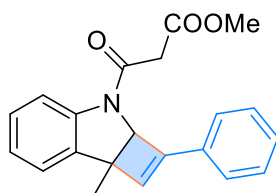

Methyl 3-(7b-methyl-2-phenyl-2a,7b-dihydro-3H-cyclobuta[b]indol-3-yl)-3-oxopropanoate (**3a**), isolated by flash column chromatography (petroleum ether/ethyl acetate = 3:1→9:1), yellow oil, 70% yield (117.3 mg),  $^1\text{H}$  NMR (400 MHz,  $\text{CDCl}_3$ )  $\delta$  8.29 (d,  $J = 8.1$  Hz, 1H), 7.53 – 7.47 (m, 2H), 7.43 (dd,  $J = 7.5, 0.8$  Hz, 1H), 7.40 – 7.29 (m, 3H), 7.25 – 7.19 (m, 1H), 7.09 (td,  $J = 7.5, 0.9$  Hz, 1H), 6.32 (s, 1H), 4.73 (s, 1H), 3.82 (s, 3H), 3.66 (q,  $J = 15.1$  Hz, 2H), 1.83 (s, 3H).  $^{13}\text{C}$  NMR (101 MHz,  $\text{CDCl}_3$ )  $\delta$  167.75, 163.94, 156.94, 143.61, 134.46, 131.73, 129.35, 128.83, 128.67, 125.99, 124.27, 124.11, 121.85, 118.88, 66.97, 56.53, 52.79, 43.53, 20.66. HRMS (ESI-TOF) Calcd for  $\text{C}_{21}\text{H}_{20}\text{NO}_3^+$  ( $[\text{M}+\text{H}]^+$ ) 334.1438. Found 334.1444.

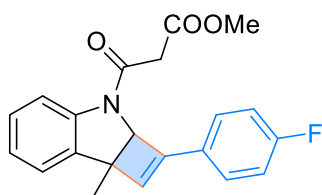

Methyl 3-(2-(4-fluorophenyl)-7b-methyl-2a,7b-dihydro-3H-cyclobuta[b]indol-3-yl)-3-oxopropanoate (**3a1**), isolated by flash column chromatography (petroleum ether/ethyl acetate = 3:1→9:1), white solid, m.p. = 168.1-168.3 °C, 62% yield (108.4 mg), <sup>1</sup>H NMR (400 MHz, CDCl<sub>3</sub>) δ 8.30 (d, *J* = 8.1 Hz, 1H), 7.47 (dd, *J* = 8.8, 5.4 Hz, 2H), 7.39 (dd, *J* = 7.5, 0.9 Hz, 1H), 7.26 – 7.20 (m, 1H), 7.12 – 7.03 (m, 3H), 6.26 (s, 1H), 4.73 (s, 1H), 3.82 (s, 3H), 3.65 (q, *J* = 15.1 Hz, 2H). <sup>13</sup>C NMR (101 MHz, CDCl<sub>3</sub>) δ 167.73, 163.93, 163.23 (d, *J* = 251.0 Hz), 155.87, 143.60, 134.23, 128.78, 128.03 (d, *J* = 3.4 Hz), 127.88 (d, *J* = 8.4 Hz), 124.30, 123.92, 121.44 (d, *J* = 2.2 Hz), 118.94, 116.00 (d, *J* = 21.9 Hz), 66.89, 56.47, 52.82, 43.52, 20.54. <sup>19</sup>F NMR (376 MHz, CDCl<sub>3</sub>) δ -110.76. HRMS (ESI-TOF) Calcd for C<sub>21</sub>H<sub>19</sub>FNO<sub>3</sub><sup>+</sup> ([M+H]<sup>+</sup>) 352.1343. Found 352.1343.

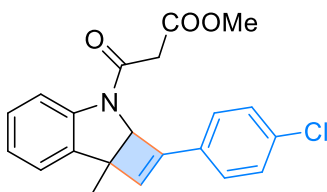

Methyl 3-(2-(4-chlorophenyl)-7b-methyl-2a,7b-dihydro-3H-cyclobuta[b]indol-3-yl)-3-oxopropanoate (**3a2**), isolated by flash column chromatography (petroleum ether/ethyl acetate = 3:1→9:1), white solid, m.p. = 151.5-151.7 °C, 81% yield (148.2 mg), <sup>1</sup>H NMR (400 MHz, CDCl<sub>3</sub>) δ 8.29 (d, *J* = 8.1 Hz, 1H), 7.44 – 7.36 (m, 3H), 7.36 – 7.30 (m, 2H), 7.26 – 7.21 (m, 1H), 7.09 (td, *J* = 7.5, 0.9 Hz, 1H), 6.31 (s, 1H), 4.73 (s, 1H), 3.81 (s, 3H), 3.65 (q, *J* = 15.1 Hz, 2H), 1.80 (s, 3H). <sup>13</sup>C NMR (101 MHz, CDCl<sub>3</sub>) δ 167.61, 163.83, 155.65, 143.46, 135.07, 134.04, 130.06, 129.02, 128.70, 127.15, 124.22, 123.83, 122.43, 118.81, 66.79, 56.37, 52.71, 43.41, 20.40. HRMS (ESI-TOF) Calcd for C<sub>21</sub>H<sub>19</sub>ClNO<sub>3</sub><sup>+</sup> ([M+H]<sup>+</sup>) 368.1048. Found 368.1052.

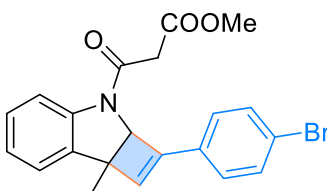

Methyl 3-(2-(4-bromophenyl)-7b-methyl-2a,7b-dihydro-3H-cyclobuta[b]indol-3-yl)-3-oxopropanoate (**3a3**), isolated by flash column chromatography (petroleum ether/ethyl acetate = 3:1→9:1), pale yellow solid, m.p. = 189.3-189.9 °C, 75% yield

(153.8 mg),  $^1\text{H}$  NMR (400 MHz,  $\text{CDCl}_3$ )  $\delta$  8.29 (d,  $J = 8.1$  Hz, 1H), 7.52 – 7.47 (m, 2H), 7.38 (dd,  $J = 7.5, 0.8$  Hz, 1H), 7.36 – 7.31 (m, 2H), 7.23 (dd,  $J = 11.4, 4.3$  Hz, 1H), 7.09 (td,  $J = 7.5, 0.9$  Hz, 1H), 6.33 (s, 1H), 4.72 (s, 1H), 3.81 (s, 3H), 3.65 (q,  $J = 15.1$  Hz, 2H), 1.81 (s, 3H).  $^{13}\text{C}$  NMR (101 MHz,  $\text{CDCl}_3$ )  $\delta$  167.60, 163.81, 155.73, 143.44, 134.01, 131.97, 130.48, 128.72, 127.38, 124.23, 123.81, 123.37, 122.57, 118.83, 66.80, 56.37, 52.72, 43.41, 20.40. HRMS (ESI-TOF) Calcd for  $\text{C}_{21}\text{H}_{19}\text{BrNO}_3^+$  ( $[\text{M}+\text{H}]^+$ ) 412.0543. Found 412.0540.

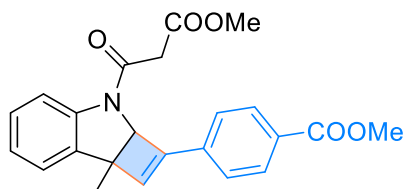

Methyl 4-(3-(3-methoxy-3-oxopropanoyl)-7b-methyl-2a,7b-dihydro-3H-cyclobuta[b]indol-2-yl)benzoate (**3a4**), isolated by flash column chromatography (petroleum ether/ethyl acetate = 3:1→9:1), white solid, m.p. = 150.3-151.7 °C, yield (141.1 mg),  $^1\text{H}$  NMR (400 MHz,  $\text{CDCl}_3$ )  $\delta$  8.30 (d,  $J = 8.1$  Hz, 1H), 8.03 (d,  $J = 8.4$  Hz, 2H), 7.55 (d,  $J = 8.4$  Hz, 2H), 7.45 – 7.39 (m, 1H), 7.27 – 7.21 (m, 1H), 7.10 (td,  $J = 7.5, 0.9$  Hz, 1H), 6.45 (s, 1H), 4.76 (s, 1H), 3.92 (s, 3H), 3.82 (s, 3H), 3.66 (q,  $J = 15.1$  Hz, 2H), 1.84 (s, 3H).  $^{13}\text{C}$  NMR (101 MHz,  $\text{CDCl}_3$ )  $\delta$  167.58, 166.48, 163.81, 155.86, 143.43, 135.70, 133.93, 130.42, 130.00, 128.75, 125.77, 124.54, 124.28, 123.90, 118.81, 66.81, 56.51, 52.72, 52.28, 43.42, 20.43. HRMS (ESI-TOF) Calcd for  $\text{C}_{23}\text{H}_{22}\text{NO}_5^+$  ( $[\text{M}+\text{H}]^+$ ) 392.1492. Found 392.1491.

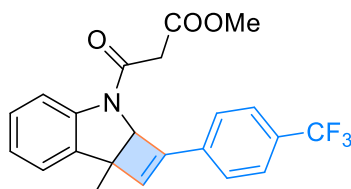

methyl 3-(7b-methyl-2-(4-(trifluoromethyl)phenyl)-2a,7b-dihydro-3H-cyclobuta[b]indol-3-yl)-3-oxopropanoate (**3a5**), isolated by flash column chromatography (petroleum ether/ethyl acetate = 3:1→9:1), pale yellow solid, m.p. = 164.1-164.7 °C, 86% yield (172.6 mg),  $^1\text{H}$  NMR (400 MHz,  $\text{CDCl}_3$ )  $\delta$  8.30 (d,  $J = 8.2$  Hz, 1H), 7.61 (q,  $J = 8.3$  Hz, 4H), 7.41 (d,  $J = 7.5$  Hz, 1H), 7.25 (t,  $J = 6.2$  Hz, 1H), 7.10 (t,  $J = 7.5$  Hz, 1H), 6.45 (s, 1H), 4.77 (s, 1H), 3.82 (s, 3H), 3.66 (q,  $J = 15.1$  Hz, 2H), 1.84 (s, 3H).  $^{13}\text{C}$  NMR (101 MHz,  $\text{CDCl}_3$ )  $\delta$  167.55, 163.78, 155.49, 143.45, 134.91, 133.80, 130.87 (q,  $J = 32.7$  Hz), 128.82, 126.11, 125.74 (q,  $J = 3.7$  Hz), 124.58, 124.28, 123.86 (q,  $J = 273.2$  Hz), 123.79, 118.86, 66.78, 56.54, 52.71, 43.41, 20.35. HRMS (ESI-TOF) Calcd for  $\text{C}_{22}\text{H}_{19}\text{F}_3\text{NO}_3^+$  ( $[\text{M}+\text{H}]^+$ ) 402.1312. Found

402.1313.

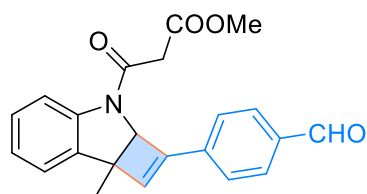

Methyl 3-(2-(4-formylphenyl)-7b-methyl-2a,7b-dihydro-3H-cyclobuta[b]indol-3-yl)-3-oxopropanoate (**3a6**), isolated by flash column chromatography (petroleum ether/ethyl acetate = 3:1→9:1), pale yellow oil, 62% yield (125.0 mg), <sup>1</sup>H NMR (400 MHz, CDCl<sub>3</sub>) δ 9.99 (s, 1H), 8.30 (d, *J* = 8.1 Hz, 1H), 7.88 (d, *J* = 8.2 Hz, 2H), 7.64 (d, *J* = 8.2 Hz, 2H), 7.46 – 7.39 (m, 1H), 7.27 – 7.22 (m, 1H), 7.11 (td, *J* = 7.5, 0.9 Hz, 1H), 6.51 (s, 1H), 4.78 (s, 1H), 3.82 (s, 3H), 3.67 (q, *J* = 15.1 Hz, 2H), 1.85 (s, 3H). <sup>13</sup>C NMR (101 MHz, CDCl<sub>3</sub>) δ 191.49, 167.57, 163.85, 155.66, 143.42, 137.12, 136.35, 133.80, 130.12, 128.83, 126.37, 125.59, 124.33, 123.85, 118.85, 66.81, 56.57, 52.74, 43.40, 20.40. HRMS (ESI-TOF) Calcd for C<sub>22</sub>H<sub>20</sub>NO<sub>4</sub><sup>+</sup> ([M+H]<sup>+</sup>) 362.1387. Found 362.1387.

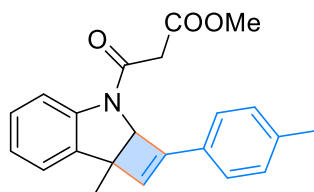

Methyl 3-(7b-methyl-2-(*p*-tolyl)-2a,7b-dihydro-3H-cyclobuta[b]indol-3-yl)-3-oxopropanoate (**3a7**), isolated by flash column chromatography (petroleum ether/ethyl acetate = 3:1→9:1), pale yellow oil, 39% yield (67.4 mg), <sup>1</sup>H NMR (400 MHz, CDCl<sub>3</sub>) δ 8.28 (d, *J* = 8.2 Hz, 1H), 7.44 – 7.38 (m, 3H), 7.24 – 7.20 (m, 1H), 7.17 (d, *J* = 7.9 Hz, 2H), 7.09 – 7.06 (m, 1H), 6.25 (s, 1H), 4.71 (s, 1H), 3.81 (s, 3H), 3.70 – 3.60 (m, 2H), 2.34 (s, 3H), 1.82 (s, 3H). <sup>13</sup>C NMR (101 MHz, CDCl<sub>3</sub>) δ 167.67, 163.85, 156.77, 143.49, 139.40, 134.48, 129.41, 128.48, 125.83, 124.13, 123.98, 120.60, 118.75, 66.91, 56.33, 52.66, 43.40, 21.44, 20.56. HRMS (ESI-TOF) Calcd for C<sub>22</sub>H<sub>22</sub>NO<sub>3</sub><sup>+</sup> ([M+H]<sup>+</sup>) 348.1594. Found 348.1595.

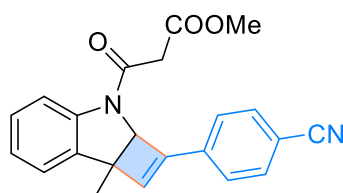

Methyl 3-(2-(4-cyanophenyl)-7b-methyl-2a,7b-dihydro-3H-cyclobuta[b]indol-3-yl)-3-oxopropanoate (**3a8**), isolated by flash column chromatography (petroleum ether/ethyl acetate = 3:1→9:1), yellow oil, 48% yield (86.0 mg), <sup>1</sup>H NMR (400 MHz,



CDCl<sub>3</sub>)  $\delta$  8.30 (d,  $J$  = 8.2 Hz, 1H), 7.67 (d,  $J$  = 8.4 Hz, 2H), 7.57 (d,  $J$  = 8.3 Hz, 2H), 7.39 (d,  $J$  = 6.8 Hz, 1H), 7.29 – 7.24 (m, 2H), 7.11 (td,  $J$  = 7.5, 0.9 Hz, 1H), 6.49 (s, 1H), 4.78 (s, 1H), 3.82 (s, 3H), 3.66 (q,  $J$  = 15.0 Hz, 2H), 1.84 (s, 3H). <sup>13</sup>C NMR (101 MHz, CDCl<sub>3</sub>)  $\delta$  167.50, 163.75, 155.07, 143.41, 135.73, 133.51, 132.58, 128.96, 126.35, 125.88, 124.36, 123.72, 118.92, 118.45, 112.51, 66.74, 56.58, 52.77, 43.43, 20.32. HRMS (ESI-TOF) Calcd for C<sub>22</sub>H<sub>19</sub>N<sub>2</sub>O<sub>3</sub><sup>+</sup> ([M+H]<sup>+</sup>) 359.1390. Found 359.1392.

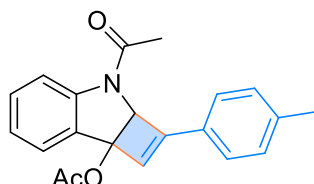

3-Acetyl-2-(*p*-tolyl)-2a,3-dihydro-7*b*H-cyclobuta[*b*]indol-7*b*-yl acetate (**3b1**), isolated by flash column chromatography (petroleum ether/ethyl acetate = 3:1→9:1), pale yellow oil, 71% yield (118.3 mg), <sup>1</sup>H NMR (400 MHz, CDCl<sub>3</sub>)  $\delta$  8.32 (d,  $J$  = 8.2 Hz, 1H), 7.50 (d,  $J$  = 8.1 Hz, 2H), 7.47 (d,  $J$  = 7.7 Hz, 1H), 7.33 – 7.28 (m, 1H), 7.21 (d,  $J$  = 7.9 Hz, 2H), 7.07 – 7.01 (m, 1H), 6.21 (s, 1H), 5.33 (s, 1H), 2.37 (s, 3H), 2.34 (s, 3H), 2.13 (s, 3H). <sup>13</sup>C NMR (101 MHz, CDCl<sub>3</sub>)  $\delta$  169.39, 168.18, 151.85, 143.24, 139.95, 130.20, 129.51, 128.71, 127.34, 126.21, 123.59, 123.45, 120.56, 118.53, 85.52, 65.29, 24.03, 21.52, 21.40. HRMS (ESI-TOF) Calcd for C<sub>21</sub>H<sub>20</sub>NO<sub>3</sub><sup>+</sup> ([M+H]<sup>+</sup>) 334.1438. Found 334.1434.

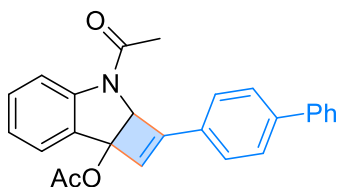

2-([1,1'-Biphenyl]-4-yl)-3-acetyl-2a,3-dihydro-7*b*H-cyclobuta[*b*]indol-7*b*-yl acetate (**3b2**), isolated by flash column chromatography (petroleum ether/ethyl acetate = 3:1→9:1), white solid, m.p. = 216.1-216.9 °C, 56% yield (110.1 mg), <sup>1</sup>H NMR (400 MHz, CDCl<sub>3</sub>)  $\delta$  8.34 (d,  $J$  = 8.2 Hz, 1H), 7.69 – 7.66 (m, 2H), 7.65 – 7.61 (m, 2H), 7.60 – 7.57 (m, 2H), 7.52 (d,  $J$  = 7.4 Hz, 1H), 7.47 – 7.42 (m, 2H), 7.38 – 7.29 (m, 2H), 7.07 (td,  $J$  = 7.5, 0.7 Hz, 1H), 6.28 (s, 1H), 5.36 (s, 1H), 2.35 (s, 3H), 2.14 (s, 3H). <sup>13</sup>C NMR (101 MHz, CDCl<sub>3</sub>)  $\delta$  169.39, 168.20, 151.58, 143.27, 142.49, 140.29, 130.31, 128.98, 128.93, 128.65, 127.82, 127.52, 127.06, 126.73, 123.60, 123.54, 121.70, 118.58, 85.55, 65.36, 24.06, 21.42. HRMS (ESI-TOF) Calcd for C<sub>26</sub>H<sub>22</sub>NO<sub>3</sub><sup>+</sup> ([M+H]<sup>+</sup>) 396.1594. Found 396.1597.

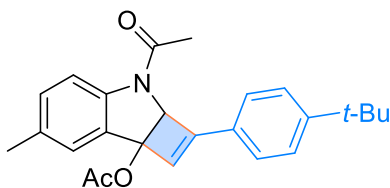

3-Acetyl-2-(4-(*tert*-butyl)phenyl)-6-methyl-2a,3-dihydro-7b*H*-cyclobuta[*b*]indol-7b-yl acetate (**3c**), isolated by flash column chromatography (petroleum ether/ethyl acetate = 3:1→9:1), yellow oil, 44% yield (82.4 mg),  $^1\text{H}$  NMR (400 MHz,  $\text{CDCl}_3$ )  $\delta$  8.18 (d,  $J = 8.3$  Hz, 1H), 7.55 (d,  $J = 8.4$  Hz, 2H), 7.44 (d,  $J = 8.4$  Hz, 2H), 7.27 (s, 1H), 7.10 (dd,  $J = 8.4, 0.9$  Hz, 1H), 6.22 (s, 1H), 5.31 (s, 1H), 2.32 (s, 3H), 2.30 (s, 3H), 2.12 (s, 3H), 1.32 (s, 9H).  $^{13}\text{C}$  NMR (101 MHz,  $\text{CDCl}_3$ )  $\delta$  169.41, 167.88, 153.02, 151.75, 141.06, 133.05, 130.89, 128.71, 127.38, 126.03, 125.79, 124.08, 120.87, 118.24, 85.65, 65.51, 34.89, 31.20, 23.93, 21.44, 21.16. HRMS (ESI-TOF) Calcd for  $\text{C}_{25}\text{H}_{28}\text{NO}_3^+$  ( $[\text{M}+\text{H}]^+$ ) 390.2064. Found 390.2064.

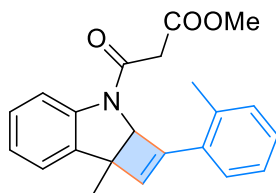

Methyl 3-(7b-methyl-2-(*o*-tolyl)-2a,7b-dihydro-3*H*-cyclobuta[*b*]indol-3-yl)-3-oxopropanoate (**3d1**), isolated by flash column chromatography (petroleum ether/ethyl acetate = 3:1→9:1), yellow oil, 55% yield (95.9 mg),  $^1\text{H}$  NMR (400 MHz,  $\text{CDCl}_3$ )  $\delta$  8.31 (d,  $J = 8.2$  Hz, 1H), 7.57 (d,  $J = 7.5$  Hz, 1H), 7.43 (d,  $J = 7.5$  Hz, 1H), 7.29 – 7.17 (m, 4H), 7.07 (t,  $J = 7.5$  Hz, 1H), 6.21 (s, 1H), 4.73 (s, 1H), 3.81 (s, 3H), 3.67 (q,  $J = 15.1$  Hz, 2H), 2.32 (s, 3H), 1.84 (s, 3H).  $^{13}\text{C}$  NMR (101 MHz,  $\text{CDCl}_3$ )  $\delta$  167.66, 163.79, 156.49, 143.67, 138.71, 134.47, 131.44, 130.47, 128.72, 128.57, 127.25, 126.39, 125.77, 124.30, 124.12, 118.72, 67.33, 57.69, 52.66, 43.45, 22.18, 21.14. HRMS (ESI-TOF) Calcd for  $\text{C}_{22}\text{H}_{22}\text{NO}_3^+$  ( $[\text{M}+\text{H}]^+$ ) 348.1594. Found 348.1595.

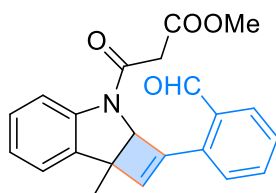

Methyl 3-(2-(2-formylphenyl)-7b-methyl-2a,7b-dihydro-3*H*-cyclobuta[*b*]indol-3-yl)-3-oxopropanoate (**3d2**), isolated by flash column chromatography (petroleum ether/ethyl acetate = 3:1→5:1), pale yellow oil, 60% yield (180.7 mg),  $^1\text{H}$  NMR (400 MHz,  $\text{CDCl}_3$ )  $\delta$  10.02 (s, 1H), 8.33 (d,  $J = 8.2$  Hz, 1H), 7.94 (dd,  $J = 7.8, 1.0$  Hz, 1H), 7.61 (td,  $J = 7.6, 1.3$  Hz, 1H), 7.48 (t,  $J = 7.6$  Hz, 1H), 7.44 (d,  $J = 7.7$  Hz, 1H), 7.32 –

7.27 (m, 1H), 7.23 – 7.18 (m, 1H), 7.10 (td,  $J = 7.5, 0.8$  Hz, 1H), 6.29 (s, 1H), 4.85 (s, 1H), 3.81 (s, 3H), 3.67 (q,  $J = 15.1$  Hz, 2H), 1.76 (s, 3H).  $^{13}\text{C}$  NMR (101 MHz,  $\text{CDCl}_3$ )  $\delta$  191.04, 167.47, 163.80, 154.25, 143.29, 135.52, 134.83, 133.61, 130.64, 129.06, 129.04, 128.56, 128.20, 124.33, 123.68, 118.96, 66.81, 59.05, 52.73, 43.42, 20.04. HRMS (ESI-TOF) Calcd for  $\text{C}_{22}\text{H}_{20}\text{NO}_4^+$  ( $[\text{M}+\text{H}]^+$ ) 362.1387. Found 362.1387.

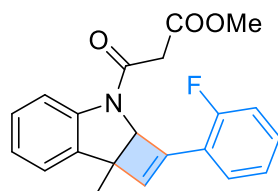

Methyl 3-(2-(2-fluorophenyl)-7b-methyl-2a,7b-dihydro-3H-cyclobuta[b]indol-3-yl)-3-oxopropanoate (**3d3**), isolated by flash column chromatography (petroleum ether/ethyl acetate = 3:1→9:1), pale yellow oil, 82% yield (143.4 mg),  $^1\text{H}$  NMR (400 MHz,  $\text{CDCl}_3$ )  $\delta$  8.30 (d,  $J = 8.1$  Hz, 1H), 7.53 (td,  $J = 7.6, 1.5$  Hz, 1H), 7.43 (d,  $J = 7.4$  Hz, 1H), 7.31 – 7.21 (m, 2H), 7.19 – 7.13 (m, 1H), 7.11 – 7.03 (m, 2H), 6.43 (d,  $J = 3.5$  Hz, 1H), 4.77 (s, 1H), 3.81 (s, 3H), 3.65 (q,  $J = 15.2$  Hz, 2H), 1.83 (s, 3H).  $^{13}\text{C}$  NMR (101 MHz,  $\text{CDCl}_3$ )  $\delta$  167.59, 163.83, 161.74 (d,  $J = 254.4$  Hz), 151.18, 143.60, 134.05, 130.50 (d,  $J = 8.7$  Hz), 128.67, 127.52, 127.46 (d,  $J = 12.0$  Hz), 124.14, 124.10, 124.03, 119.71 (d,  $J = 13.8$  Hz), 118.73, 116.24 (d,  $J = 21.5$  Hz), 67.81, 57.08, 52.66, 43.40, 20.68.  $^{19}\text{F}$  NMR (376 MHz,  $\text{CDCl}_3$ )  $\delta$  -111.29 (s, 1F). HRMS (ESI-TOF) Calcd for  $\text{C}_{21}\text{H}_{19}\text{FNO}_3^+$  ( $[\text{M}+\text{H}]^+$ ) 352.1343. Found 352.1343.

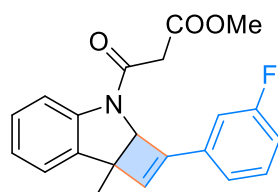

Methyl 3-(2-(3-fluorophenyl)-7b-methyl-2a,7b-dihydro-3H-cyclobuta[b]indol-3-yl)-3-oxopropanoate (**3e1**), isolated by flash column chromatography (petroleum ether/ethyl acetate = 3:1→9:1), yellow oil, 80% yield (140.4 mg),  $^1\text{H}$  NMR (400 MHz,  $\text{CDCl}_3$ )  $\delta$  8.30 (d,  $J = 8.2$  Hz, 1H), 7.41 (d,  $J = 7.5$  Hz, 1H), 7.33 (dd,  $J = 13.8, 7.8$  Hz, 1H), 7.24 (dd,  $J = 15.3, 7.6$  Hz, 2H), 7.15 (d,  $J = 9.5$  Hz, 1H), 7.09 (t,  $J = 7.5$  Hz, 1H), 7.01 (t,  $J = 8.2$  Hz, 1H), 6.35 (s, 1H), 4.74 (s, 1H), 3.81 (s, 3H), 3.65 (q,  $J = 15.1$  Hz, 2H), 1.81 (s, 3H).  $^{13}\text{C}$  NMR (101 MHz,  $\text{CDCl}_3$ )  $\delta$  167.58, 164.93 (d,  $J = 247.7$  Hz), 163.83, 155.68 (d,  $J = 2.4$  Hz), 155.67, 143.46, 133.98, 133.73 (d,  $J = 7.1$  Hz), 130.37 (d,  $J = 8.3$  Hz), 128.70, 124.25, 123.89, 123.33, 121.64 (d,  $J = 2.9$  Hz), 118.80, 116.15 (d,  $J = 21.4$  Hz), 112.66 (d,  $J = 21.9$  Hz), 66.75, 56.46, 52.68, 43.40, 20.36. Calcd for  $\text{C}_{21}\text{H}_{19}\text{FNO}_3^+$  ( $[\text{M}+\text{H}]^+$ ) 352.1343. Found 352.1343.

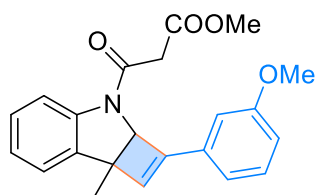

Methyl 3-(2-(3-methoxyphenyl)-7b-methyl-2a,7b-dihydro-3*H*-cyclobuta[*b*]indol-3-yl)-3-oxopropanoate (**3e2**), isolated by flash column chromatography (petroleum ether/ethyl acetate = 3:1→9:1), yellow oil, 60% yield (109.2 mg), <sup>1</sup>H NMR (400 MHz, CDCl<sub>3</sub>) δ 8.29 (d, *J* = 8.0 Hz, 1H), 7.42 (dd, *J* = 7.5, 0.8 Hz, 1H), 7.28 (t, *J* = 7.9 Hz, 1H), 7.25 – 7.19 (m, 1H), 7.07 (dd, *J* = 11.8, 4.2 Hz, 2H), 7.03 – 6.98 (m, 1H), 6.86 (dd, *J* = 8.2, 2.2 Hz, 1H), 6.31 (s, 1H), 4.71 (s, 1H), 3.81 (s, 3H), 3.81 (s, 3H), 3.65 (q, *J* = 15.1 Hz, 2H), 1.82 (s, 3H). <sup>13</sup>C NMR (101 MHz, CDCl<sub>3</sub>) δ 167.64, 163.84, 159.79, 156.69, 143.50, 134.32, 132.91, 129.80, 128.56, 124.18, 123.99, 122.19, 118.75, 118.40, 114.64, 111.52, 66.81, 56.43, 55.30, 52.66, 43.40, 20.53. HRMS (ESI-TOF) Calcd for C<sub>22</sub>H<sub>22</sub>NO<sub>4</sub><sup>+</sup> ([M+H]<sup>+</sup>) 364.1543. Found 364.1544.

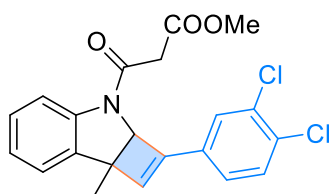

Methyl 3-(2-(3,4-dichlorophenyl)-7b-methyl-2a,7b-dihydro-3*H*-cyclobuta[*b*]indol-3-yl)-3-oxopropanoate (**3f**), isolated by flash column chromatography (petroleum ether/ethyl acetate = 3:1→9:1), yellow oil, 76% yield (151.8 mg), <sup>1</sup>H NMR (400 MHz, CDCl<sub>3</sub>) δ 8.29 (d, *J* = 8.2 Hz, 1H), 7.52 (d, *J* = 1.7 Hz, 1H), 7.41 (d, *J* = 8.3 Hz, 1H), 7.37 (d, *J* = 7.4 Hz, 1H), 7.30 – 7.21 (m, 2H), 7.10 (t, *J* = 7.5 Hz, 1H), 6.35 (s, 1H), 4.74 (s, 1H), 3.81 (s, 3H), 3.70 – 3.58 (m, 2H), 1.79 (s, 3H). <sup>13</sup>C NMR (101 MHz, CDCl<sub>3</sub>) δ 167.56, 163.84, 154.52, 143.40, 133.72, 133.15, 133.06, 131.58, 130.80, 128.83, 127.68, 125.04, 124.33, 123.97, 123.74, 118.84, 66.73, 56.45, 52.70, 43.37, 20.27. HRMS (ESI-TOF) Calcd for C<sub>21</sub>H<sub>18</sub>Cl<sub>2</sub>NO<sub>3</sub><sup>+</sup> ([M+H]<sup>+</sup>) 402.0658. Found 402.0662.

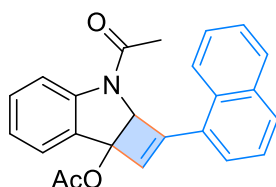

3-Acetyl-2-(naphthalen-1-yl)-2a,3-dihydro-7*bH*-cyclobuta[*b*]indol-7*b*-yl acetate (**3g**), isolated by flash column chromatography (petroleum ether/ethyl acetate = 3:1→9:1), yellow solid, m.p. = 222.3-222.8 °C, 75% yield (68.0 mg), <sup>1</sup>H NMR (400 MHz,

CDCl<sub>3</sub>) δ 8.36 (d, *J* = 8.2 Hz, 1H), 8.23 – 8.12 (m, 1H), 8.04 – 7.94 (m, 1H), 7.87 (t, *J* = 5.0 Hz, 2H), 7.58 – 7.48 (m, 3H), 7.45 (d, *J* = 7.4 Hz, 1H), 7.37 – 7.28 (m, 1H), 7.03 (t, *J* = 7.3 Hz, 1H), 6.55 (s, 1H), 5.46 (s, 1H), 2.41 (s, 3H), 2.16 (s, 3H). <sup>13</sup>C NMR (101 MHz, CDCl<sub>3</sub>) δ 169.38, 168.20, 151.00, 143.30, 133.92, 131.49, 130.35, 130.28, 128.98, 128.72, 127.13, 126.78, 126.68, 126.17, 125.07, 124.51, 123.69, 123.52, 118.55, 87.10, 65.88, 24.11, 21.50. HRMS (ESI-TOF) Calcd for C<sub>24</sub>H<sub>20</sub>NO<sub>3</sub><sup>+</sup> ([M+H]<sup>+</sup>) 370.1438. Found 370.1441.

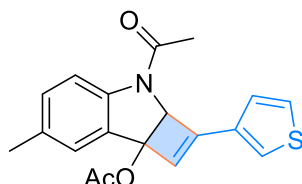

3-Acetyl-6-methyl-2-(thiophen-3-yl)-2a,3-dihydro-7bH-cyclobuta[b]indol-7b-yl acetate (**3h**), isolated by flash column chromatography (petroleum ether/ethyl acetate = 3:1→9:1), pale yellow solid, m.p. = 208.5-208.8 °C, 53% yield (90.7 mg), <sup>1</sup>H NMR (400 MHz, CDCl<sub>3</sub>) δ 8.19 (d, *J* = 8.4 Hz, 1H), 7.62 (d, *J* = 2.1 Hz, 1H), 7.34 (dd, *J* = 5.0, 2.9 Hz, 1H), 7.23 (dd, *J* = 5.1, 1.1 Hz, 2H), 7.12 (d, *J* = 8.4 Hz, 1H), 6.03 (s, 1H), 5.33 (s, 1H), 2.31 (s, 3H), 2.30 (s, 3H), 2.13 (s, 3H). <sup>13</sup>C NMR (101 MHz, CDCl<sub>3</sub>) δ 169.36, 167.84, 147.21, 141.01, 133.11, 132.05, 131.00, 128.57, 126.67, 125.54, 124.63, 123.72, 120.38, 118.31, 85.42, 65.95, 23.92, 21.39, 21.13. HRMS (ESI-TOF) Calcd for C<sub>19</sub>H<sub>18</sub>NO<sub>3</sub>S<sup>+</sup> ([M+H]<sup>+</sup>) 340.1002. Found 340.1003.

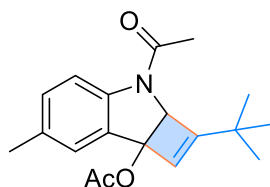

3-Acetyl-2-(*tert*-butyl)-6-methyl-2a,3-dihydro-7bH-cyclobuta[b]indol-7b-yl acetate (**3i**), isolated by flash column chromatography (petroleum ether/ethyl acetate = 3:1→9:1), pale yellow solid, m.p. = 123.5-123.9 °C, 54% yield (81.6 mg), <sup>1</sup>H NMR (400 MHz, CDCl<sub>3</sub>) δ 8.17 (d, *J* = 8.3 Hz, 1H), 7.15 (s, 1H), 7.10 (dd, *J* = 8.4, 1.1 Hz, 1H), 5.82 (s, 1H), 5.06 (s, 1H), 2.32 (s, 3H), 2.25 (s, 3H), 2.08 (s, 3H), 1.13 (s, 9H). <sup>13</sup>C NMR (101 MHz, CDCl<sub>3</sub>) δ 169.41, 167.82, 164.18, 141.11, 132.59, 130.47, 128.92, 124.61, 122.69, 117.95, 86.68, 64.52, 33.57, 28.51, 23.77, 21.53, 21.12. HRMS (ESI-TOF) Calcd for C<sub>19</sub>H<sub>24</sub>NO<sub>3</sub><sup>+</sup> ([M+H]<sup>+</sup>) 314.1751. Found 314.1750.

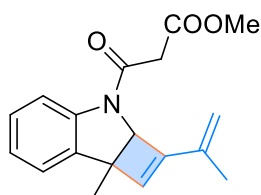

Methyl 3-(7b-methyl-2-(prop-1-en-2-yl)-2a,7b-dihydro-3H-cyclobuta[b]indol-3-yl)-3-oxopropanoate (**3j**), isolated by flash column chromatography (petroleum ether/ethyl acetate = 3:1→9:1), pale yellow oil, 49% yield (73.3 mg),  $^1\text{H}$  NMR (400 MHz,  $\text{CDCl}_3$ )  $\delta$  8.27 (d,  $J = 8.2$  Hz, 1H), 7.27 (d,  $J = 7.4$  Hz, 1H), 7.23 (t,  $J = 7.8$  Hz, 1H), 7.07 (t,  $J = 7.5$  Hz, 1H), 5.95 (s, 1H), 5.33 (s, 1H), 5.14 (s, 1H), 4.61 (s, 1H), 3.79 (s, 3H), 3.61 (q,  $J = 15.1$  Hz, 2H), 1.77 (s, 3H), 1.72 (s, 3H).  $^{13}\text{C}$  NMR (101 MHz,  $\text{CDCl}_3$ )  $\delta$  167.63, 163.82, 158.41, 143.35, 135.78, 134.53, 128.42, 124.07, 124.02, 123.06, 118.69, 116.31, 66.62, 56.08, 52.62, 43.34, 20.41, 18.52. HRMS (ESI-TOF) Calcd for  $\text{C}_{18}\text{H}_{20}\text{NO}_3^+$  ( $[\text{M}+\text{H}]^+$ ) 298.1438. Found 298.1436.

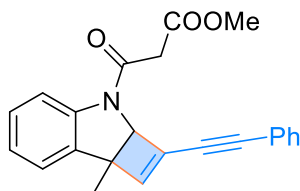

Methyl 3-(7b-methyl-2-(phenylethynyl)-2a,7b-dihydro-3H-cyclobuta[b]indol-3-yl)-3-oxopropanoate (**3k**), isolated by flash column chromatography (petroleum ether/ethyl acetate = 3:1→9:1), yellow oil, 75% yield (134.2 mg),  $^1\text{H}$  NMR (400 MHz,  $\text{CDCl}_3$ )  $\delta$  8.27 (d,  $J = 8.1$  Hz, 1H), 7.46 (dd,  $J = 7.2, 2.0$  Hz, 2H), 7.35 – 7.24 (m, 5H), 7.11 (t,  $J = 7.4$  Hz, 1H), 6.17 (s, 1H), 4.72 (s, 1H), 3.79 (s, 3H), 3.60 (q,  $J = 15.1$  Hz, 2H), 1.69 (s, 3H).  $^{13}\text{C}$  NMR (101 MHz,  $\text{CDCl}_3$ )  $\delta$  167.50, 163.75, 142.93, 140.95, 133.99, 132.24, 131.90, 129.22, 128.82, 128.46, 124.46, 123.05, 121.99, 118.60, 96.89, 80.47, 67.15, 58.94, 52.68, 43.41, 19.19. HRMS (ESI-TOF) Calcd for  $\text{C}_{23}\text{H}_{20}\text{NO}_3^+$  ( $[\text{M}+\text{H}]^+$ ) 358.1438. Found 358.1438.

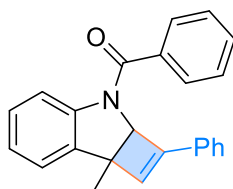

(7b-Methyl-2-phenyl-2a,7b-dihydro-3H-cyclobuta[b]indol-3-yl)(phenyl)methanone (**311**), isolated by flash column chromatography (petroleum ether/ethyl acetate = 3:1→5:1), pale yellow solid, m.p. = 175.0-175.4  $^\circ\text{C}$ , 45% yield (76.1 mg),  $^1\text{H}$  NMR (400 MHz,  $\text{CDCl}_3$ )  $\delta$  8.29 (s, 1H), 7.62 (d,  $J = 6.5$  Hz, 2H), 7.50 (d,  $J = 7.0$  Hz, 5H), 7.46 (d,  $J = 7.7$  Hz, 1H), 7.36 (t,  $J = 7.4$  Hz, 2H), 7.33 – 7.18 (m, 2H), 7.10 (d,  $J = 6.6$

Hz, 1H), 6.26 (s, 1H), 4.56 (s, 1H), 1.75 (s, 3H).  $^{13}\text{C}$  NMR (101 MHz,  $\text{CDCl}_3$ )  $\delta$  169.92, 156.87, 143.41, 137.31, 135.61, 131.83, 130.35, 129.04, 128.68, 128.61, 128.25, 127.11, 125.83, 124.12, 123.38, 119.41, 68.23, 56.20, 20.12. HRMS (ESI-TOF) Calcd for  $\text{C}_{24}\text{H}_{20}\text{NO}^+$  ( $[\text{M}+\text{H}]^+$ ) 338.1539. Found 338.1540.

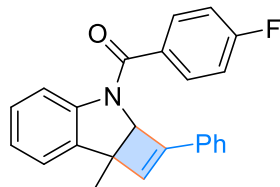

(4-Fluorophenyl)(7b-methyl-2-phenyl-2a,7b-dihydro-3H-cyclobuta[b]indol-3-yl)methanone (**312**), isolated by flash column chromatography (petroleum ether/ethyl acetate = 3:1→9:1), pale yellow oil, 51% yield (90.4 mg),  $^1\text{H}$  NMR (400 MHz,  $\text{CDCl}_3$ )  $\delta$  8.22 (s, 1H), 7.64 (dd,  $J = 8.3, 5.4$  Hz, 2H), 7.54 – 7.48 (m, 2H), 7.46 (dd,  $J = 7.6, 0.8$  Hz, 1H), 7.39 – 7.22 (m, 4H), 7.17 (t,  $J = 8.6$  Hz, 2H), 7.09 (t,  $J = 7.5$  Hz, 1H), 6.26 (s, 1H), 4.58 (s, 1H), 1.76 (s, 3H).  $^{13}\text{C}$  NMR (101 MHz,  $\text{CDCl}_3$ )  $\delta$  168.87, 163.89 (d,  $J = 251.7$  Hz), 157.12, 143.35, 135.64, 133.39, 131.75, 129.53 (d,  $J = 9.1$  Hz), 129.13, 128.95, 128.72, 128.26, 128.19, 125.86, 124.18, 123.08, 119.35, 115.75 (d,  $J = 21.2$  Hz), 68.27, 20.12.  $^{19}\text{F}$  NMR (376 MHz,  $\text{CDCl}_3$ )  $\delta$  -109.19. HRMS (ESI-TOF) Calcd for  $\text{C}_{24}\text{H}_{19}\text{FNO}^+$  ( $[\text{M}+\text{H}]^+$ ) 356.1445. Found 356.1449.

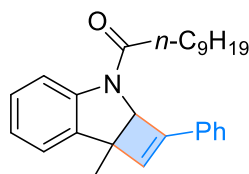

1-(7b-Methyl-2-phenyl-2a,7b-dihydro-3H-cyclobuta[b]indol-3-yl)decan-1-one (**3m1**), isolated by flash column chromatography (petroleum ether/ethyl acetate = 3:1→9:1), pale yellow oil, 60% yield (102.9 mg),  $^1\text{H}$  NMR (400 MHz,  $\text{CDCl}_3$ )  $\delta$  8.32 (d,  $J = 8.1$  Hz, 1H), 7.50 (d,  $J = 7.1$  Hz, 2H), 7.41 (d,  $J = 7.3$  Hz, 1H), 7.36 (t,  $J = 7.3$  Hz, 2H), 7.31 (d,  $J = 7.2$  Hz, 1H), 7.24 – 7.17 (m, 1H), 7.04 (td,  $J = 7.5, 0.9$  Hz, 1H), 6.33 (s, 1H), 4.71 (s, 1H), 2.63 – 2.41 (m, 2H), 1.82 (s, 3H), 1.80 – 1.74 (m, 2H), 1.44 – 1.27 (m, 12H), 0.89 (t,  $J = 6.8$  Hz, 3H).  $^{13}\text{C}$  NMR (101 MHz,  $\text{CDCl}_3$ )  $\delta$  171.59, 156.30, 144.09, 134.06, 131.88, 129.04, 128.68, 128.45, 125.84, 123.93, 123.36, 122.31, 118.45, 66.56, 56.14, 35.89, 31.92, 29.57, 29.54, 29.52, 29.34, 24.82, 22.71, 20.67, 14.15. HRMS (ESI-TOF) Calcd for  $\text{C}_{27}\text{H}_{34}\text{NO}^+$  ( $[\text{M}+\text{H}]^+$ ) 388.2635. Found 388.2635.

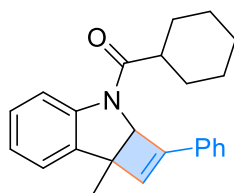

Cyclohexyl(7b-methyl-2-phenyl-2a,7b-dihydro-3H-cyclobuta[b]indol-3-yl)methanone (**3m2**), isolated by flash column chromatography (petroleum ether/ethyl acetate = 15:1→30:1), pale yellow solid, m.p. = 189.3-189.9 °C, 60% yield (102.9 mg), <sup>1</sup>H NMR (400 MHz, CDCl<sub>3</sub>) δ 8.34 (d, *J* = 8.2 Hz, 1H), 7.50 (d, *J* = 7.6 Hz, 2H), 7.41 (d, *J* = 7.4 Hz, 1H), 7.36 (t, *J* = 7.4 Hz, 2H), 7.31 (d, *J* = 7.1 Hz, 1H), 7.21 (t, *J* = 7.8 Hz, 1H), 7.04 (t, *J* = 7.5 Hz, 1H), 6.33 (s, 1H), 4.75 (s, 1H), 2.56 (t, *J* = 11.5 Hz, 1H), 1.95 – 1.85 (m, 4H), 1.82 (s, 3H), 1.78 – 1.71 (m, 2H), 1.42 – 1.23 (m, 4H). <sup>13</sup>C NMR (101 MHz, CDCl<sub>3</sub>) δ 175.05, 156.45, 144.23, 134.30, 131.88, 129.05, 128.68, 128.44, 125.86, 123.92, 123.41, 122.54, 118.74, 66.51, 56.05, 44.35, 29.69, 29.46, 25.93, 25.80, 20.69. HRMS (ESI-TOF) Calcd for C<sub>24</sub>H<sub>26</sub>NO<sup>+</sup> ([M+H]<sup>+</sup>) 344.2009. Found 344.2009.

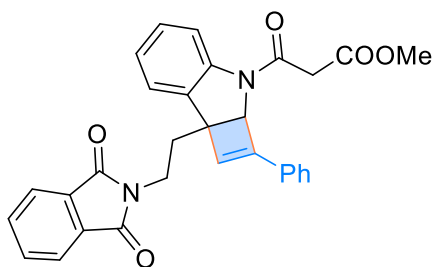

Methyl 3-(7b-(2-(1,3-dioxoisindolin-2-yl)ethyl)-2-phenyl-2a,7b-dihydro-3H-cyclobuta[b]indol-3-yl)-3-oxopropanoate (**3n**), isolated by flash column chromatography (petroleum ether/ethyl acetate = 3:1→9:1), pale yellow oil, 38% yield (78.8 mg), <sup>1</sup>H NMR (400 MHz, CDCl<sub>3</sub>) δ 8.20 (d, *J* = 8.2 Hz, 1H), 7.68 (dt, *J* = 7.2, 3.7 Hz, 2H), 7.63 (dd, *J* = 7.9, 4.9 Hz, 2H), 7.42 (d, *J* = 7.6 Hz, 3H), 7.29 – 7.25 (m, 2H), 7.21 (d, *J* = 7.1 Hz, 1H), 7.10 (t, *J* = 7.8 Hz, 1H), 6.99 (t, *J* = 7.5 Hz, 1H), 6.34 (s, 1H), 5.11 (s, 1H), 3.85 (s, 3H), 3.83 – 3.78 (m, 2H), 3.78 – 3.66 (m, 2H), 2.70 (dd, *J* = 14.5, 7.2 Hz, 1H), 2.62 (dd, *J* = 14.5, 7.1 Hz, 1H). <sup>13</sup>C NMR (101 MHz, CDCl<sub>3</sub>) δ 167.99, 167.61, 163.94, 155.41, 143.50, 133.75, 132.29, 131.81, 131.27, 129.26, 128.65, 125.76, 124.19, 123.95, 123.09, 122.54, 118.95, 63.56, 58.89, 52.72, 43.50, 34.69, 31.18. HRMS (ESI-TOF) Calcd for C<sub>30</sub>H<sub>25</sub>N<sub>2</sub>O<sub>5</sub><sup>+</sup> ([M+H]<sup>+</sup>) 493.1758. Found 493.1759.



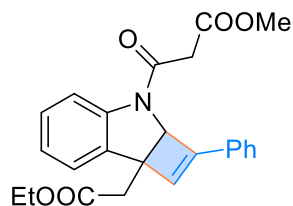

Methyl 3-(7b-(2-ethoxy-2-oxoethyl)-2-phenyl-2a,7b-dihydro-3H-cyclobuta[b]indol-3-yl)-3-oxopropanoate (**3o**), isolated by flash column chromatography (petroleum ether/ethyl acetate = 3:1→9:1), yellow oil, 12% yield (24.8 mg),  $^1\text{H}$  NMR (400 MHz,  $\text{CDCl}_3$ )  $\delta$  8.30 (d,  $J = 8.2$  Hz, 1H), 7.48 (d,  $J = 7.4$  Hz, 2H), 7.43 (d,  $J = 7.5$  Hz, 1H), 7.39 – 7.32 (m, 3H), 7.24 (d,  $J = 7.9$  Hz, 1H), 7.08 (t,  $J = 7.5$  Hz, 1H), 6.34 (s, 1H), 5.21 (s, 1H), 4.01 – 3.91 (m, 2H), 3.82 (s, 3H), 3.68 (q,  $J = 15.2$  Hz, 2H), 3.28 (d,  $J = 15.2$  Hz, 1H), 3.11 (d,  $J = 15.2$  Hz, 1H), 0.95 (t,  $J = 7.1$  Hz, 3H).  $^{13}\text{C}$  NMR (101 MHz,  $\text{CDCl}_3$ )  $\delta$  170.03, 167.55, 163.83, 154.84, 143.78, 131.81, 131.35, 129.37, 129.03, 128.73, 125.87, 124.06, 123.89, 122.94, 118.93, 64.96, 60.70, 57.24, 52.66, 43.45, 38.78, 13.77. HRMS (ESI-TOF) Calcd for  $\text{C}_{24}\text{H}_{24}\text{NO}_5^+$  ( $[\text{M}+\text{H}]^+$ ) 406.1649. Found 406.1649.

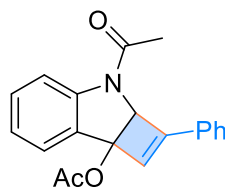

3-Acetyl-2-phenyl-2a,3-dihydro-7bH-cyclobuta[b]indol-7b-yl acetate (**3p1**), isolated by flash column chromatography (petroleum ether/ethyl acetate = 3:1→9:1), white solid, m.p. = 195.2-195.7 °C, 71% yield (141.1 mg),  $^1\text{H}$  NMR (400 MHz,  $\text{CDCl}_3$ )  $\delta$  8.32 (d,  $J = 8.2$  Hz, 1H), 7.61 (d,  $J = 7.2$  Hz, 2H), 7.49 (d,  $J = 7.5$  Hz, 1H), 7.43 – 7.35 (m, 3H), 7.31 (t,  $J = 7.9$  Hz, 1H), 7.05 (t,  $J = 7.5$  Hz, 1H), 6.27 (s, 1H), 5.34 (s, 1H), 2.34 (s, 3H), 2.13 (s, 3H).  $^{13}\text{C}$  NMR (101 MHz,  $\text{CDCl}_3$ )  $\delta$  169.37, 168.20, 151.92, 143.24, 130.26, 130.10, 129.71, 128.81, 128.62, 126.25, 123.60, 123.50, 121.73, 118.54, 85.54, 65.26, 24.03, 21.39. HRMS (ESI-TOF) Calcd for  $\text{C}_{20}\text{H}_{18}\text{NO}_3^+$  ( $[\text{M}+\text{H}]^+$ ) 320.1281. Found 320.1283.

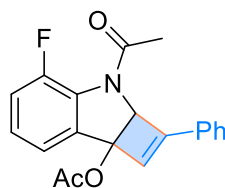

3-Acetyl-4-fluoro-2-phenyl-2a,3-dihydro-7bH-cyclobuta[b]indol-7b-yl acetate (**3p2**), isolated by flash column chromatography (petroleum ether/ethyl acetate = 3:1→9:1), pale yellow oil, 72% yield (121.8 mg),  $^1\text{H}$  NMR (400 MHz,  $\text{CDCl}_3$ )  $\delta$  8.12 (d,  $J = 8.2$

Hz, 1H), 7.77 – 7.69 (m, 2H), 7.40 (tt,  $J = 8.9, 4.5$  Hz, 3H), 7.30 – 7.22 (m, 1H), 6.72 (t,  $J = 8.9$  Hz, 1H), 6.32 (s, 1H), 5.29 (s, 1H), 2.34 (s, 3H), 2.15 (s, 3H).  $^{13}\text{C}$  NMR (101 MHz,  $\text{CDCl}_3$ )  $\delta$  169.53, 168.25, 158.8 (d,  $J = 247.9$  Hz), 152.10, 145.30 (d,  $J = 7.6$  Hz), 131.85 (d,  $J = 8.5$  Hz), 129.92, 129.86, 128.67, 126.42 (d,  $J = 4.5$  Hz), 121.93, 114.28, 110.64 (d,  $J = 20.3$  Hz), 84.12, 65.56, 24.04, 21.12.  $^{19}\text{F}$  NMR (376 MHz,  $\text{CDCl}_3$ )  $\delta$  -117.02. HRMS (ESI-TOF) Calcd for  $\text{C}_{20}\text{H}_{17}\text{FNO}_3^+$  ( $[\text{M}+\text{H}]^+$ ) 338.1187. Found 338.1191.

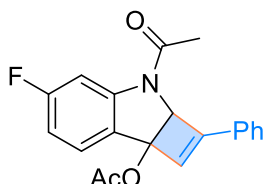

3-Acetyl-5-fluoro-2-phenyl-2a,3-dihydro-7bH-cyclobuta[b]indol-7b-yl acetate (**3q1**), isolated by flash column chromatography (petroleum ether/ethyl acetate = 3:1→9:1), yellow oil, 53% yield (118.5 mg),  $^1\text{H}$  NMR (400 MHz,  $\text{CDCl}_3$ )  $\delta$  8.29 (dd,  $J = 9.0, 4.8$  Hz, 1H), 7.61 – 7.55 (m, 2H), 7.46 – 7.36 (m, 3H), 7.16 (dd,  $J = 7.8, 2.7$  Hz, 1H), 6.99 (td,  $J = 8.9, 2.7$  Hz, 1H), 6.28 (s, 1H), 5.34 (s, 1H), 2.33 (s, 3H), 2.15 (s, 3H).  $^{13}\text{C}$  NMR (101 MHz,  $\text{CDCl}_3$ )  $\delta$  169.30, 167.95, 158.92 (d,  $J = 243.4$  Hz), 151.56, 139.31, 130.28 (d,  $J = 7.6$  Hz), 129.92, 129.84, 128.94, 126.19, 121.97, 119.65 (d,  $J = 7.8$  Hz), 116.70 (d,  $J = 22.7$  Hz), 110.70 (d,  $J = 24.4$  Hz), 84.98, 65.61, 23.77, 21.30.  $^{19}\text{F}$  NMR (376 MHz,  $\text{CDCl}_3$ )  $\delta$  -118.66. HRMS (ESI-TOF) Calcd for  $\text{C}_{20}\text{H}_{17}\text{FNO}_3^+$  ( $[\text{M}+\text{H}]^+$ ) 338.1187. Found 338.1191.

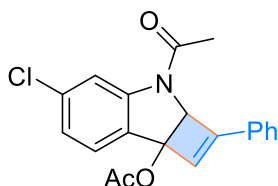

3-Acetyl-5-chloro-2-phenyl-2a,3-dihydro-7bH-cyclobuta[b]indol-7b-yl acetate (**3q2**), isolated by flash column chromatography (petroleum ether/ethyl acetate = 3:1→9:1), pale pink solid, m.p. = 115.5-116.4 °C, 89% yield (158.0 mg),  $^1\text{H}$  NMR (400 MHz,  $\text{CDCl}_3$ )  $\delta$  8.37 (d,  $J = 1.3$  Hz, 1H), 7.58 (dd,  $J = 8.0, 1.4$  Hz, 2H), 7.44 – 7.36 (m, 4H), 7.02 (dd,  $J = 8.1, 1.9$  Hz, 1H), 6.27 (s, 1H), 5.33 (s, 1H), 2.34 (s, 3H), 2.14 (s, 3H).  $^{13}\text{C}$  NMR (101 MHz,  $\text{CDCl}_3$ )  $\delta$  169.32, 168.29, 151.79, 144.09, 135.80, 129.91, 129.82, 128.89, 127.19, 126.22, 124.22, 123.63, 121.77, 118.78, 84.92, 65.63, 23.95, 21.33. HRMS (ESI-TOF) Calcd for  $\text{C}_{20}\text{H}_{17}\text{ClNO}_3^+$  ( $[\text{M}+\text{H}]^+$ ) 354.0891. Found 354.0894.

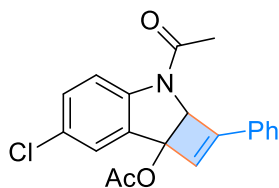

3-Acetyl-6-chloro-2-phenyl-2a,3-dihydro-7bH-cyclobuta[b]indol-7b-yl acetate (**3r1**), isolated by flash column chromatography (petroleum ether/ethyl acetate = 3:1→9:1), yellow solid, m.p. = 155.5-156.5 °C, 63% yield (113.8 mg), <sup>1</sup>H NMR (400 MHz, CDCl<sub>3</sub>) δ 8.26 (d, *J* = 8.8 Hz, 1H), 7.61 – 7.56 (m, 2H), 7.42 (tt, *J* = 9.3, 4.5 Hz, 4H), 7.28 – 7.23 (m, 1H), 6.28 (s, 1H), 5.32 (s, 1H), 2.33 (s, 3H), 2.15 (s, 3H). <sup>13</sup>C NMR (101 MHz, CDCl<sub>3</sub>) δ 169.28, 168.13, 151.58, 141.86, 130.37, 130.20, 129.95, 129.78, 128.97, 128.40, 126.21, 123.66, 121.91, 119.60, 84.93, 65.51, 23.89, 21.32. HRMS (ESI-TOF) Calcd for C<sub>20</sub>H<sub>17</sub>ClNO<sub>3</sub><sup>+</sup> ([M+H]<sup>+</sup>) 354.0891. Found 354.0894.

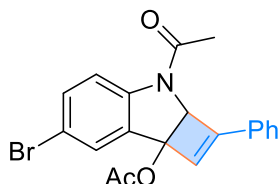

3-Acetyl-6-bromo-2-phenyl-2a,3-dihydro-7bH-cyclobuta[b]indol-7b-yl acetate (**3r2**), isolated by flash column chromatography (petroleum ether/ethyl acetate = 3:1→9:1), yellow solid, m.p. = 190.2-191.1 °C, 65% yield (130.0 mg), <sup>1</sup>H NMR (400 MHz, CDCl<sub>3</sub>) δ 8.21 (d, *J* = 8.8 Hz, 1H), 7.58 (d, *J* = 7.7 Hz, 2H), 7.55 (s, 1H), 7.41 (dt, *J* = 8.8, 6.9 Hz, 4H), 6.27 (s, 1H), 5.31 (s, 1H), 2.33 (s, 3H), 2.14 (s, 3H). <sup>13</sup>C NMR (101 MHz, CDCl<sub>3</sub>) δ 169.28, 168.21, 151.59, 142.34, 133.10, 130.79, 129.96, 129.76, 128.98, 126.53, 126.21, 121.92, 120.03, 115.89, 84.85, 65.45, 23.92, 21.33. HRMS (ESI-TOF) Calcd for C<sub>20</sub>H<sub>17</sub>BrNO<sub>3</sub><sup>+</sup> ([M+H]<sup>+</sup>) 398.0386. Found 398.0395.

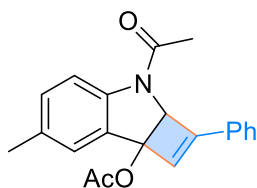

3-Acetyl-6-methyl-2-phenyl-2a,3-dihydro-7bH-cyclobuta[b]indol-7b-yl acetate (**3r3**), isolated by flash column chromatography (petroleum ether/ethyl acetate = 3:1→9:1), purple solid, m.p. = 190.2-191.2 °C, 81% yield (135.8 mg), <sup>1</sup>H NMR (400 MHz, CDCl<sub>3</sub>) δ 8.19 (d, *J* = 8.4 Hz, 1H), 7.64 – 7.58 (m, 2H), 7.45 – 7.35 (m, 3H), 7.14 – 7.08 (m, 1H), 6.28 (s, 1H), 5.32 (s, 1H), 2.33 (s, 3H), 2.30 (s, 3H), 2.14 (s, 3H). <sup>13</sup>C NMR (101 MHz, CDCl<sub>3</sub>) δ 169.40, 167.88, 151.87, 141.03, 133.12, 130.95, 130.18, 129.66, 128.82, 128.59, 126.25, 124.02, 121.80, 118.25, 85.64, 65.44, 23.92, 21.43,

21.13. HRMS (ESI-TOF) Calcd for  $C_{21}H_{20}NO_3^+$  ( $[M+H]^+$ ) 334.1438. Found 334.1439.

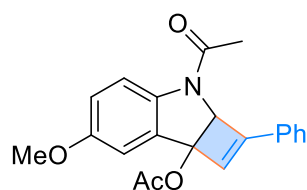

3-Acetyl-6-methoxy-2-phenyl-2a,3-dihydro-7bH-cyclobuta[b]indol-7b-yl acetate (**3r4**), isolated by flash column chromatography (petroleum ether/ethyl acetate = 3:1→9:1), yellow solid, m.p. = 204.1-204.2 °C, 79% yield (136.9 mg),  $^1H$  NMR (400 MHz,  $CDCl_3$ )  $\delta$  8.25 (d,  $J$  = 9.0 Hz, 1H), 7.64 – 7.54 (m, 2H), 7.44 – 7.33 (m, 3H), 7.02 (d,  $J$  = 2.7 Hz, 1H), 6.83 (dd,  $J$  = 9.0, 2.7 Hz, 1H), 6.28 (s, 1H), 5.32 (s, 1H), 3.76 (s, 3H), 2.32 (s, 3H), 2.14 (s, 3H).  $^{13}C$  NMR (101 MHz,  $CDCl_3$ )  $\delta$  169.33, 167.53, 155.89, 151.65, 137.03, 130.11, 130.01, 129.71, 128.84, 126.23, 122.03, 119.24, 114.26, 110.20, 85.49, 65.57, 55.66, 23.75, 21.37. HRMS (ESI-TOF) Calcd for  $C_{21}H_{20}NO_4^+$  ( $[M+H]^+$ ) 350.1387. Found 350.1388.

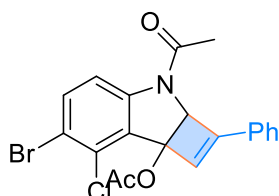

3-Acetyl-6-bromo-7-chloro-2-phenyl-2a,3-dihydro-7bH-cyclobuta[b]indol-7b-yl acetate (**3s**), isolated by flash column chromatography (petroleum ether/ethyl acetate = 3:1→9:1), yellow oil, 56% yield (120.0 mg),  $^1H$  NMR (400 MHz,  $CDCl_3$ )  $\delta$  8.18 (d,  $J$  = 8.8 Hz, 1H), 7.81 – 7.67 (m, 2H), 7.51 (d,  $J$  = 8.8 Hz, 1H), 7.41 – 7.33 (m, 3H), 6.30 (s, 1H), 5.17 (s, 1H), 2.32 (s, 3H), 2.22 (s, 3H).  $^{13}C$  NMR (101 MHz,  $CDCl_3$ )  $\delta$  169.35, 168.26, 152.49, 144.03, 134.92, 130.69, 129.85, 128.36, 127.51, 127.24, 123.88, 117.89, 117.04, 85.87, 64.98, 23.97, 20.86. HRMS (ESI-TOF) Calcd for  $C_{20}H_{16}BrClNO_3^+$  ( $[M+H]^+$ ) 431.9997. Found 431.9998.

## VI. General procedure for the synthesis of substrates 1

Most of the substrates 1 are previously reported compounds and were synthesized following established procedures.<sup>1-4</sup> The remaining substrates listed below are new compounds.

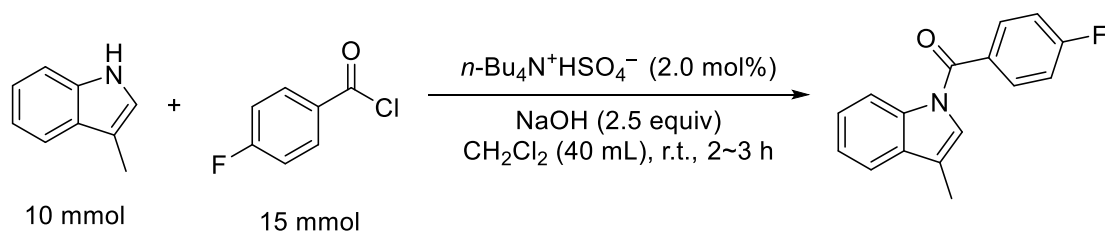

In a 100 mL round-bottom flask, add 10 mmol of 3-methylindole, tetrabutylammonium hydrogen sulfate ( $n\text{-Bu}_4\text{N}^+\text{HSO}_4^-$ , 2.0 mol%), NaOH (2.5 equiv), and 40 mL of dichloromethane. Stir vigorously, then add 4-fluorobenzoyl chloride (1.5 equiv) dropwise. Continue stirring at room temperature for 2~3 hours. After the reaction was complete (monitored by TLC), the mixture was cooled down to room temperature. Pour the mixture into 100 mL of water and extract twice with 30 mL of dichloromethane. The residue obtained after evaporation of the solvent was purified on silica gel (petroleum ether–ethyl acetate) to afford substrates **112**.

(4-Fluorophenyl)(3-methyl-1*H*-indol-1-yl)methanone (**112**), isolated by flash column chromatography (petroleum ether/ethyl acetate = 5:1→15:1), white solid, m.p. = 105.8-106.2 °C, 64% yield (1.624 g),  $^1\text{H}$  NMR (400 MHz,  $\text{CDCl}_3$ )  $\delta$  8.34 (d,  $J$  = 8.0 Hz, 1H), 7.76 – 7.64 (m, 2H), 7.51 (d,  $J$  = 7.1 Hz, 1H), 7.33 (dtd,  $J$  = 20.9, 7.4, 1.1 Hz, 2H), 7.19 – 7.12 (m, 2H), 7.00 (d,  $J$  = 1.1 Hz, 1H), 2.22 (s, 3H).  $^{13}\text{C}$  NMR (101 MHz,  $\text{CDCl}_3$ )  $\delta$  167.23, 164.70 (d,  $J$  = 254.0 Hz), 136.36, 131.84, 131.63 (d,  $J$  = 8.9 Hz), 131.09 (d,  $J$  = 3.3 Hz), 125.11, 124.19, 123.83, 119.00, 118.14, 116.45, 115.79 (d,  $J$  = 22.0 Hz), 9.70. HRMS (ESI-TOF) Calcd for  $\text{C}_{16}\text{H}_{13}\text{FNO}_5^+$  ( $[\text{M}+\text{H}]^+$ ) 254.0976. Found 254.0974.

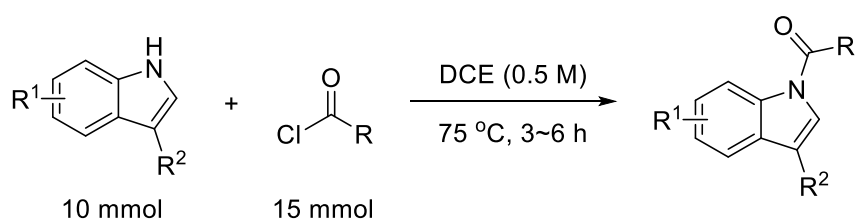

A mixture of an indole derivative (10.0 mmol), acyl chloride (15 mmol, 1.5 equiv), and DCE (20.0 mL) was stirred at 75 °C for 3~6 hours. After the reaction was complete (monitored by TLC), the mixture was cooled down to room temperature. The residue obtained after evaporation of the solvent was purified on silica gel (petroleum ether–ethyl acetate) to afford substrates **1m1** and **1o**.

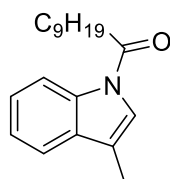

1-(3-Methyl-1*H*-indol-1-yl)decan-1-one (**1m1**), isolated by flash column chromatography (petroleum ether/ethyl acetate = 15:1→20:1), yellow oil, 40% yield (1.136 g), <sup>1</sup>H NMR (400 MHz, CDCl<sub>3</sub>) δ 8.36 (d, *J* = 7.8 Hz, 1H), 7.39 (d, *J* = 7.7 Hz, 1H), 7.28 – 7.22 (m, 1H), 7.21 – 7.16 (m, 1H), 7.10 (s, 1H), 2.73 (t, *J* = 7.5 Hz, 2H), 2.18 (s, 3H), 1.79 – 1.66 (m, 2H), 1.38 – 1.09 (m, 14H), 0.80 (t, *J* = 6.8 Hz, 3H). <sup>13</sup>C NMR (101 MHz, CDCl<sub>3</sub>) δ 171.33, 135.94, 131.33, 125.12, 123.28, 121.69, 118.76, 118.14, 116.69, 35.91, 31.93, 29.51, 29.48, 29.35, 29.31, 24.75, 22.73, 14.18, 9.76. HRMS (ESI-TOF) Calcd for C<sub>19</sub>H<sub>28</sub>NO<sup>+</sup> ([M+H]<sup>+</sup>) 286.2165. Found 286.2164.

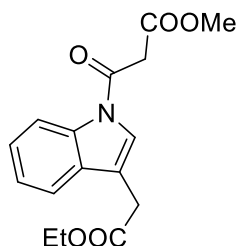

Methyl 3-(3-(2-ethoxy-2-oxoethyl)-1*H*-indol-1-yl)-3-oxopropanoate (**1o**), isolated by flash column chromatography (petroleum ether/ethyl acetate = 15:1→30:1), yellow oil, 27% yield (825.6 mg), <sup>1</sup>H NMR (400 MHz, CDCl<sub>3</sub>) δ 8.41 (d, *J* = 7.9 Hz, 1H), 7.51 (d, *J* = 7.7 Hz, 1H), 7.39 (s, 1H), 7.35 (t, *J* = 7.7 Hz, 1H), 7.29 (t, *J* = 7.5 Hz, 1H), 4.17 (q, *J* = 7.1 Hz, 2H), 3.94 (s, 2H), 3.77 (s, 3H), 3.69 (s, 2H), 1.26 (t, *J* = 7.1 Hz, 3H). <sup>13</sup>C NMR (101 MHz, CDCl<sub>3</sub>) δ 170.63, 166.71, 163.82, 135.83, 130.23, 125.76, 124.14, 123.21, 119.04, 116.76, 116.21, 61.16, 52.84, 43.41, 30.94, 14.18. HRMS (ESI-TOF) Calcd for C<sub>16</sub>H<sub>18</sub>NO<sub>5</sub><sup>+</sup> ([M+H]<sup>+</sup>) 304.1179. Found 304.1179.

## VII. Crystallographic Data

X-ray crystallographic data for compound **3a1** (CDCC number: 2366793)

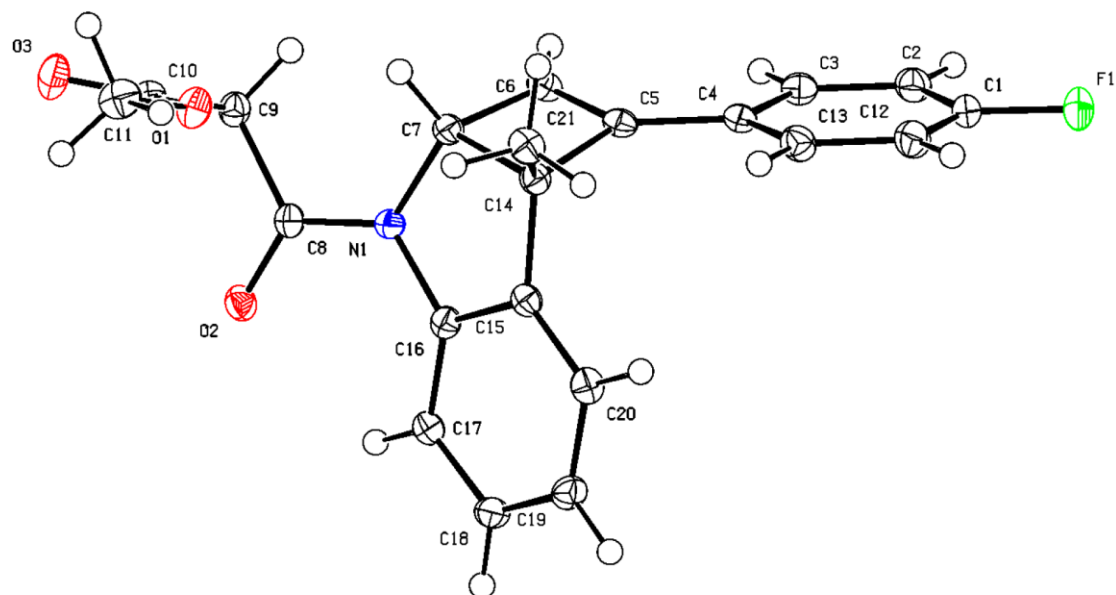

|                                             |                                                               |
|---------------------------------------------|---------------------------------------------------------------|
| Empirical formula                           | C <sub>21</sub> H <sub>18</sub> FNO <sub>3</sub>              |
| Formula weight                              | 351.12                                                        |
| Temperature/K                               | 100                                                           |
| Crystal system                              | triclinic                                                     |
| Space group                                 | P 21/n                                                        |
| a/Å                                         | 12.5984(6)                                                    |
| b/Å                                         | 10.5934(5)                                                    |
| c/Å                                         | 13.2326(6)                                                    |
| α/°                                         | 90                                                            |
| β/°                                         | 108.318(2)                                                    |
| γ/°                                         | 90                                                            |
| Volume/Å <sup>3</sup>                       | 1676.53(14)                                                   |
| Z                                           | 4                                                             |
| ρ <sub>calc</sub> /cm <sup>3</sup>          | 1.392                                                         |
| μ/mm <sup>-1</sup>                          | 0.529                                                         |
| F(000)                                      | 736.0                                                         |
| Crystal size/mm <sup>3</sup>                | 0.15 × 0.13 × 0.1                                             |
| Radiation                                   | Cu Kα (λ = 1.54186)                                           |
| 2θ range for data collection/°              | 9.836 to 143.998                                              |
| Index ranges                                | -10 ≤ h ≤ 10, -11 ≤ k ≤ 7, -11 ≤ l ≤ 11                       |
| Reflections collected                       | 6988                                                          |
| Independent reflections                     | 2750 [R <sub>int</sub> = 0.0122, R <sub>sigma</sub> = 0.0115] |
| Data/restraints/parameters                  | 2750/0/196                                                    |
| Goodness-of-fit on F <sup>2</sup>           | 1.149                                                         |
| Final R indexes [I >= 2σ (I)]               | R <sub>1</sub> = 0.0329, wR <sub>2</sub> = 0.0832             |
| Final R indexes [all data]                  | R <sub>1</sub> = 0.0313, wR <sub>2</sub> = 0.0343             |
| Largest diff. peak/hole / e Å <sup>-3</sup> | 0.27/-0.18                                                    |

## VIII. Copies of NMR spectra

### H/H-COSY Spectra of **3a**

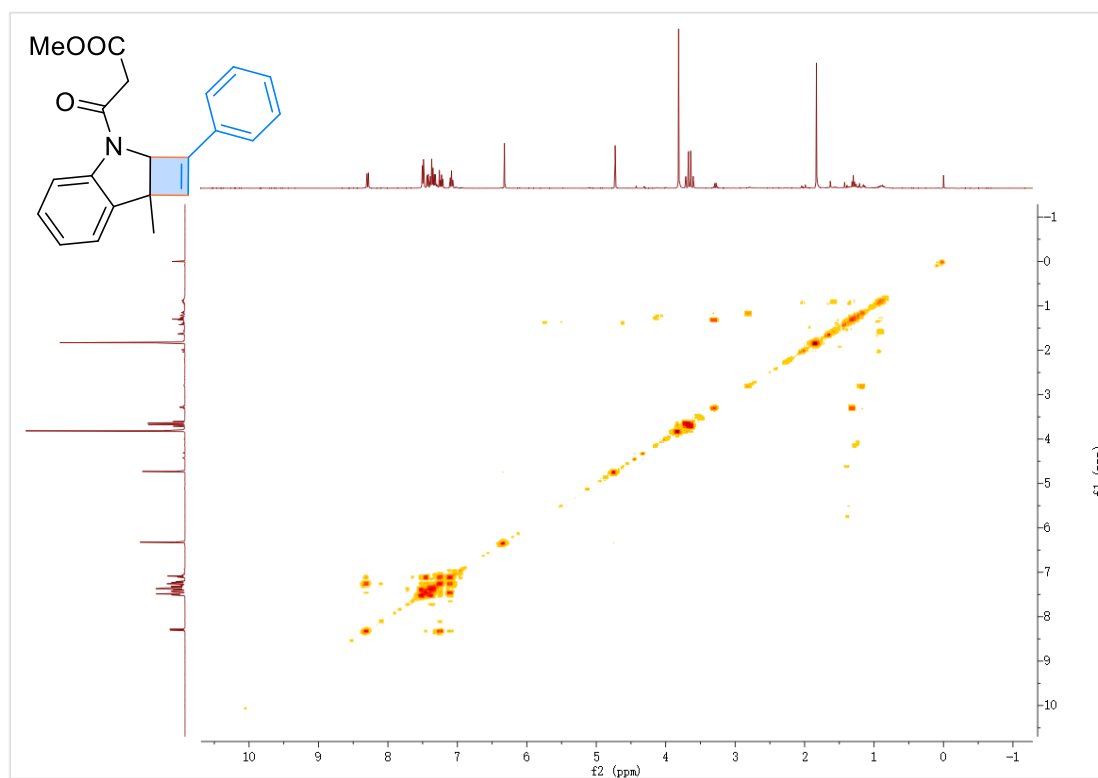

### HSQC Spectra of **3a**

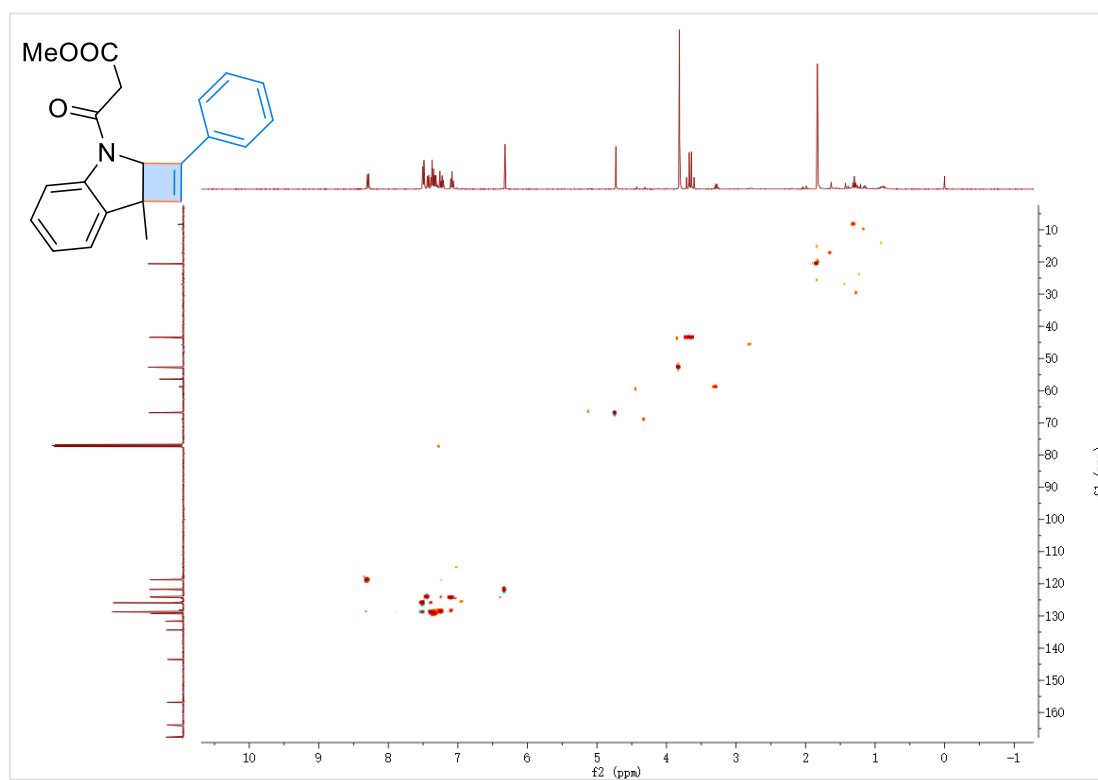



### HMBC Spectra of 3a

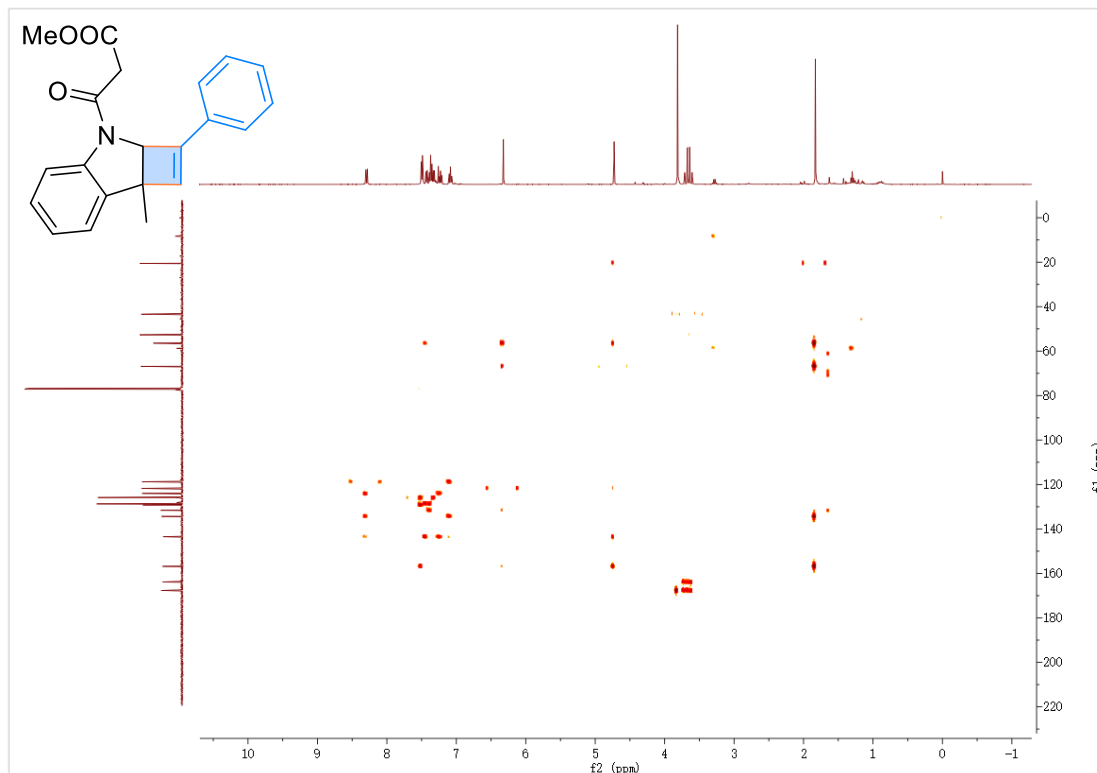

### 3a <sup>1</sup>H NMR

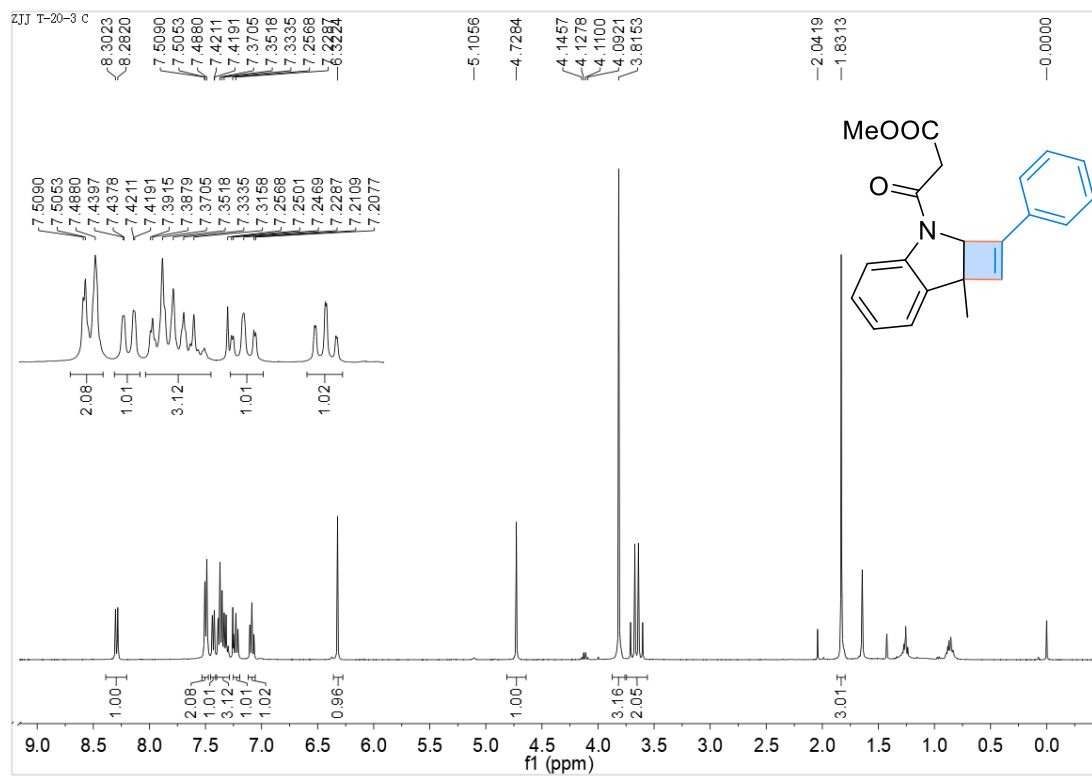

### 3a <sup>13</sup>C NMR

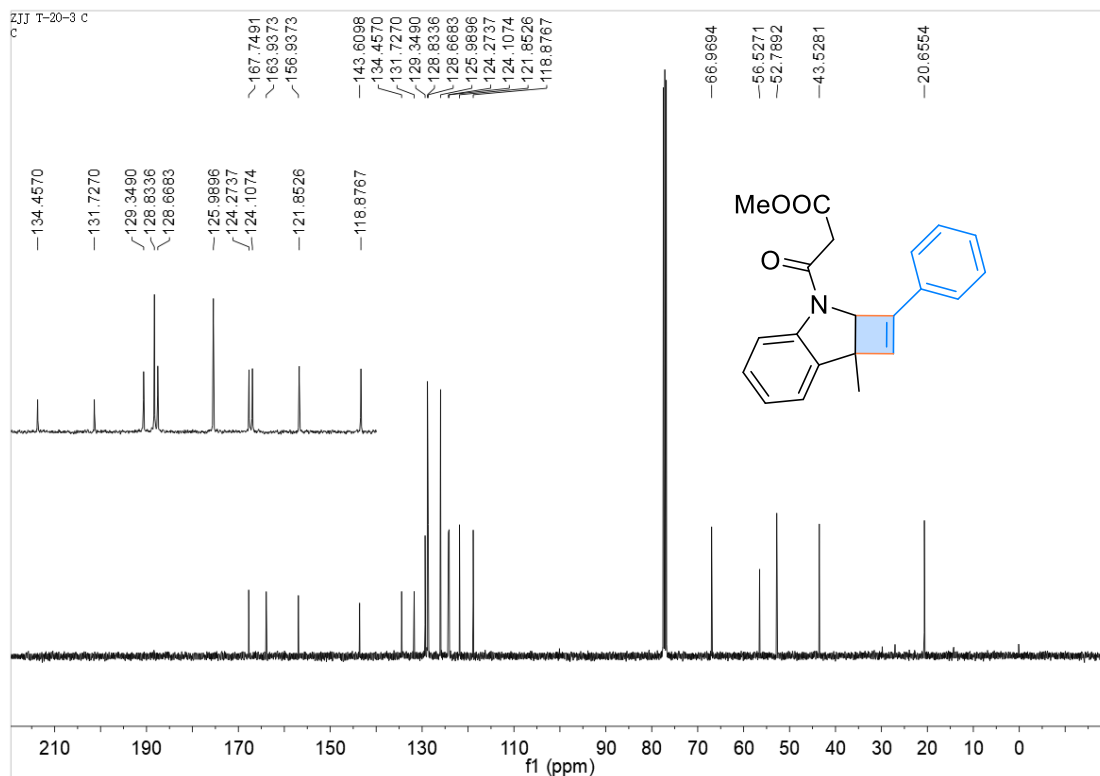

### 3a DEPT 90 and DEPT 135

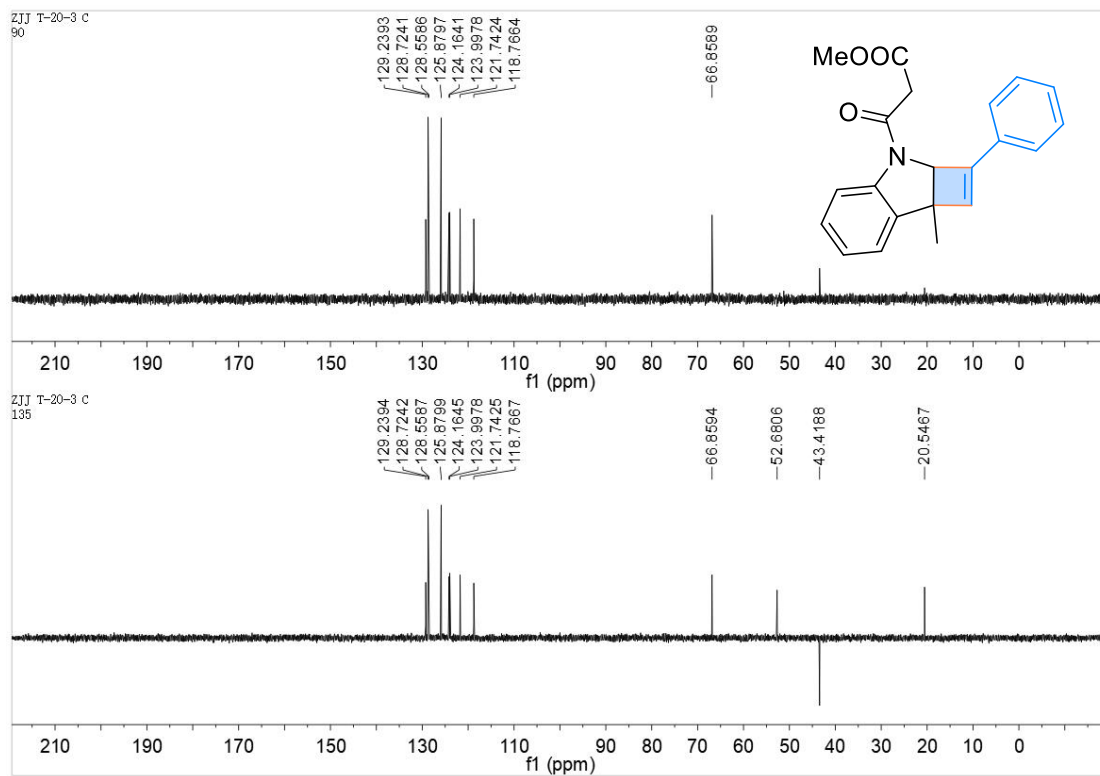

### 3a-D <sup>1</sup>H NMR

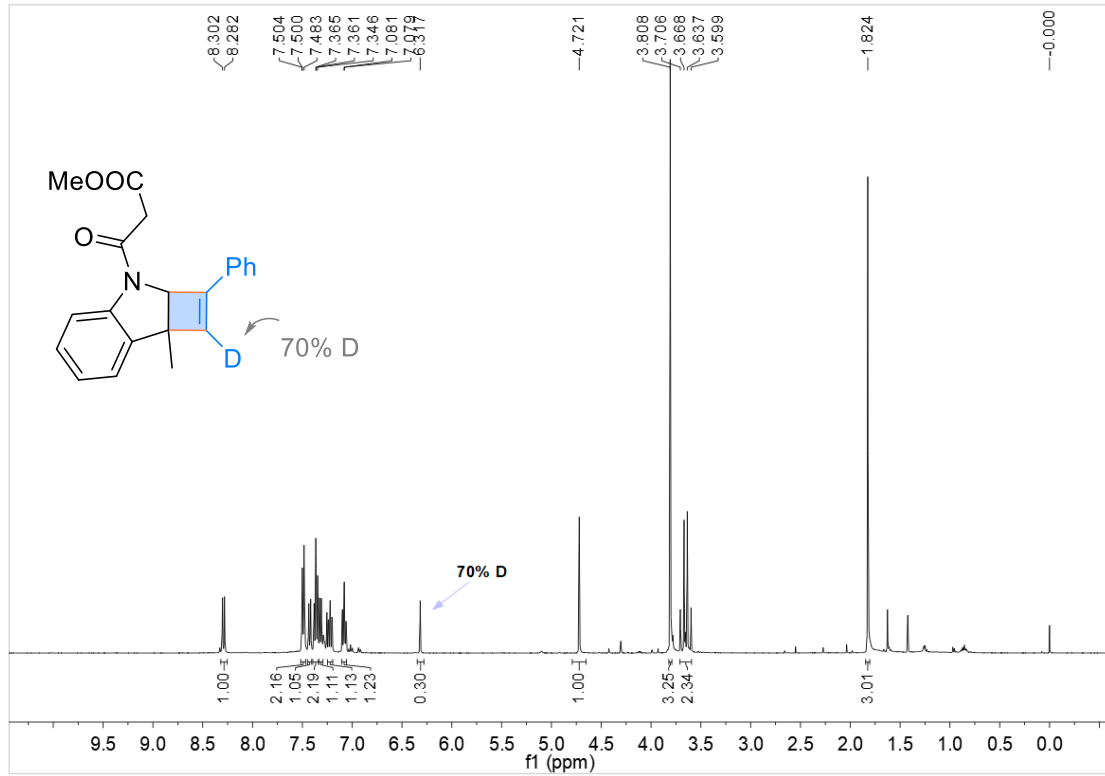

### 3a-D <sup>13</sup>C NMR

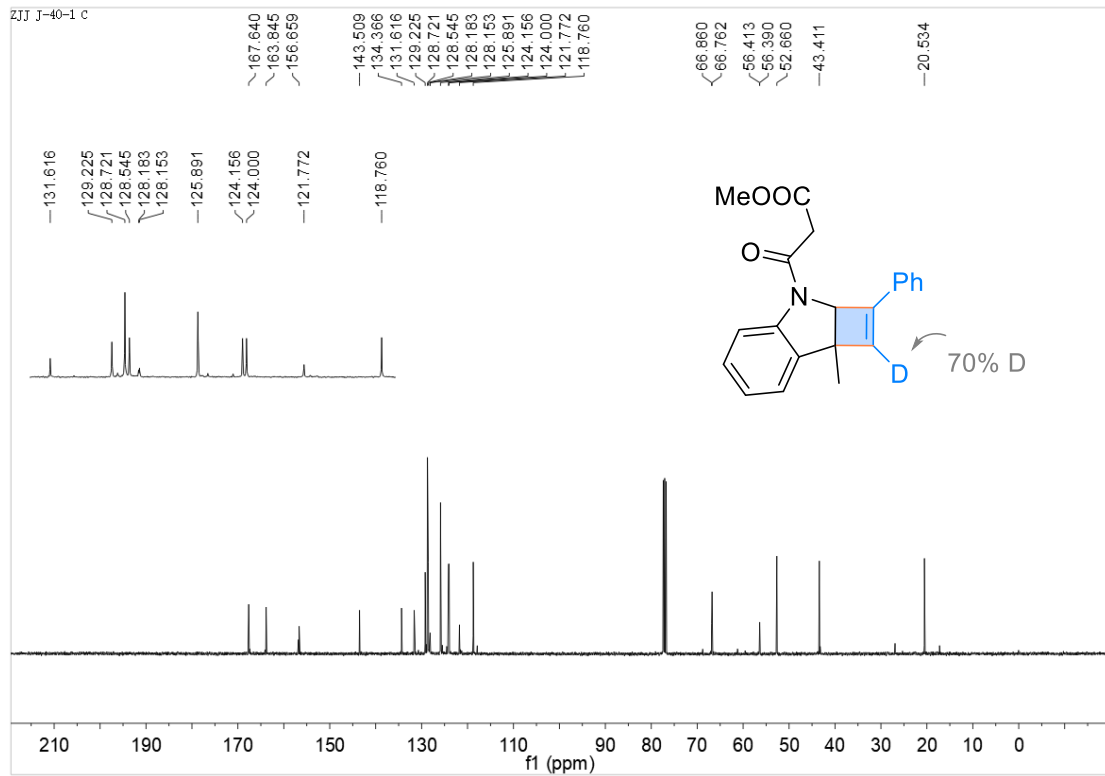

### 3a-D DEPT 90 and DEPT 135

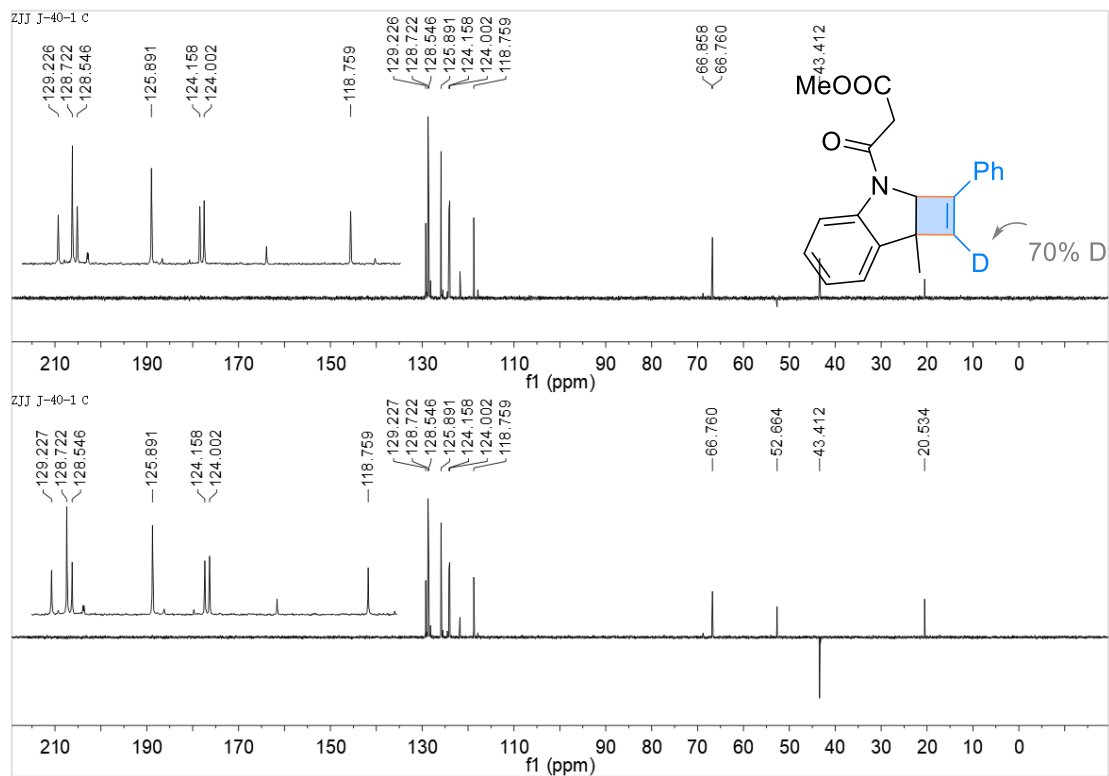

### 3a1 <sup>1</sup>H NMR

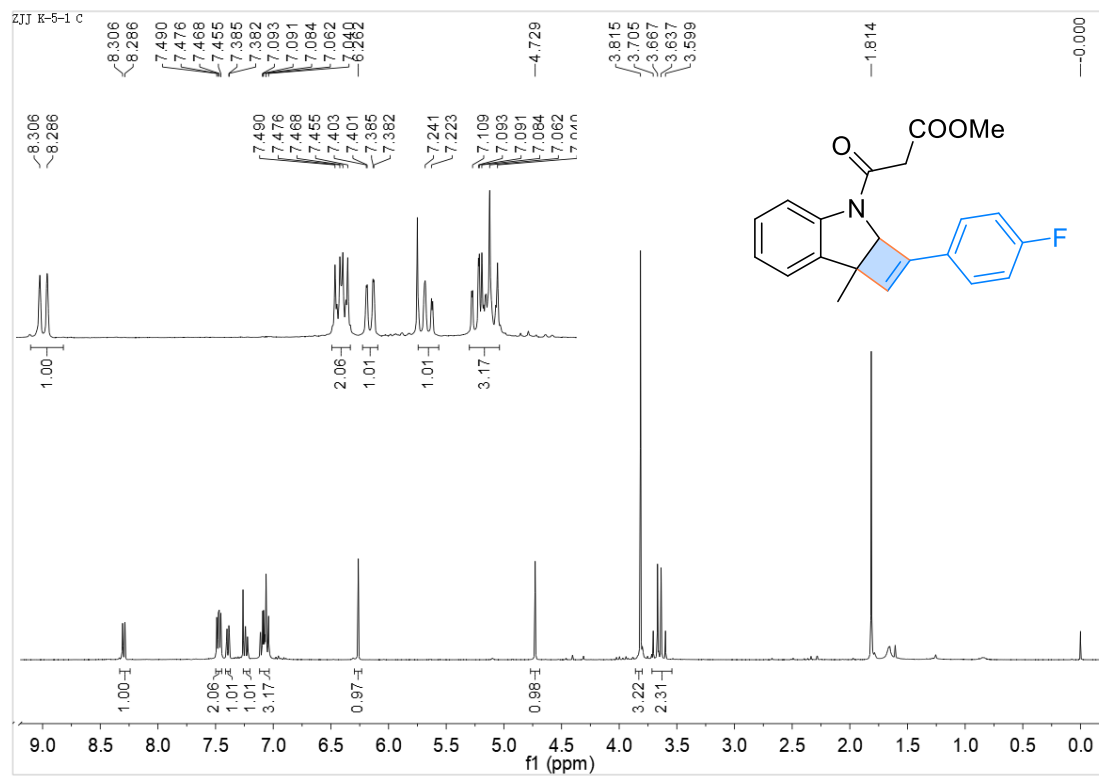

### 3a1 <sup>13</sup>C NMR

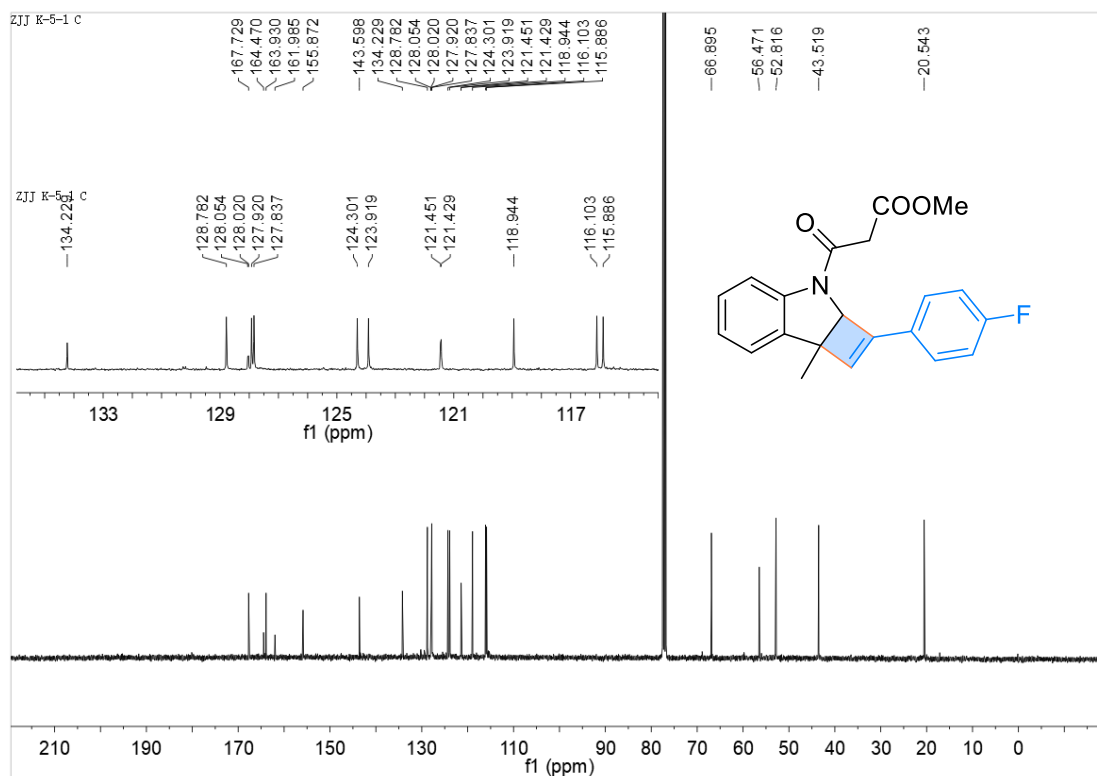

### 3a1 DEPT 90 and DEPT 135

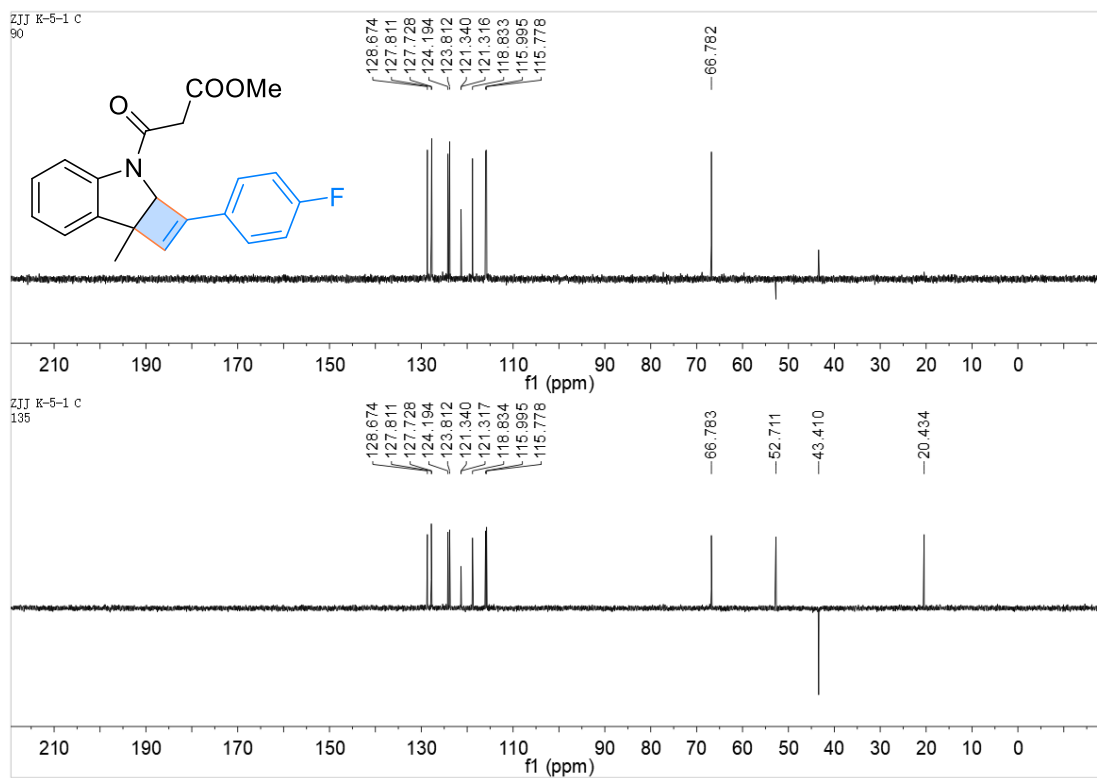

### 3a1 <sup>19</sup>F NMR

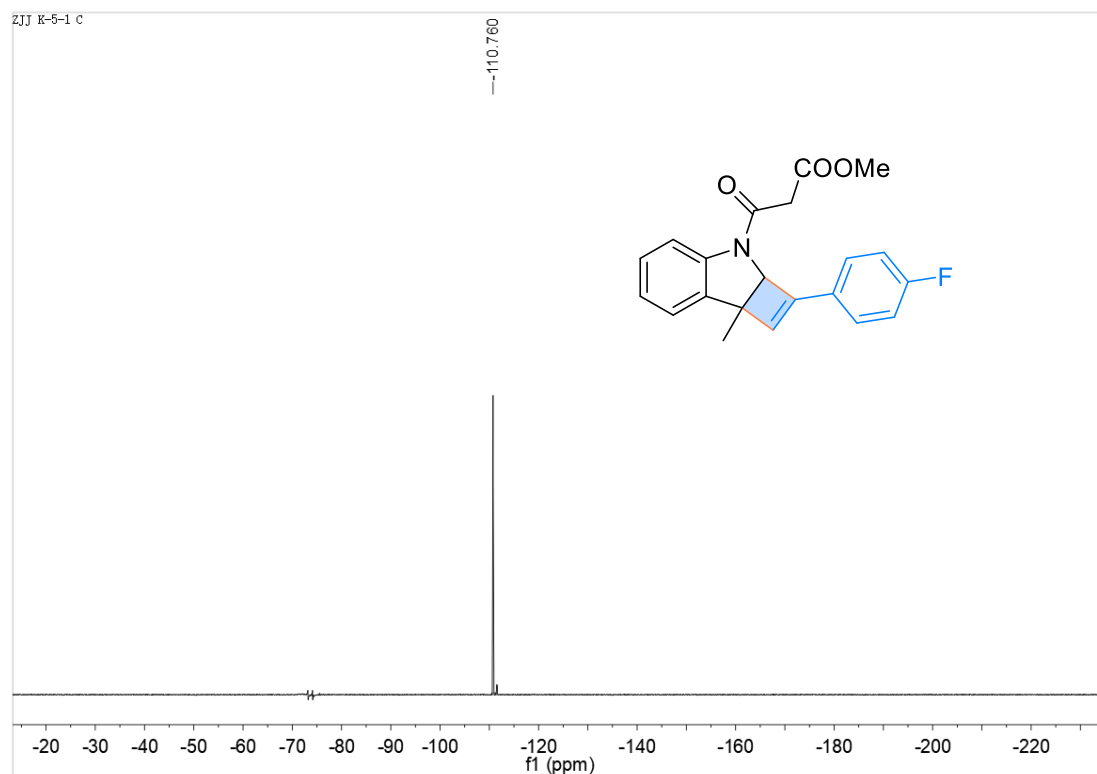

### 3a2 <sup>1</sup>H NMR

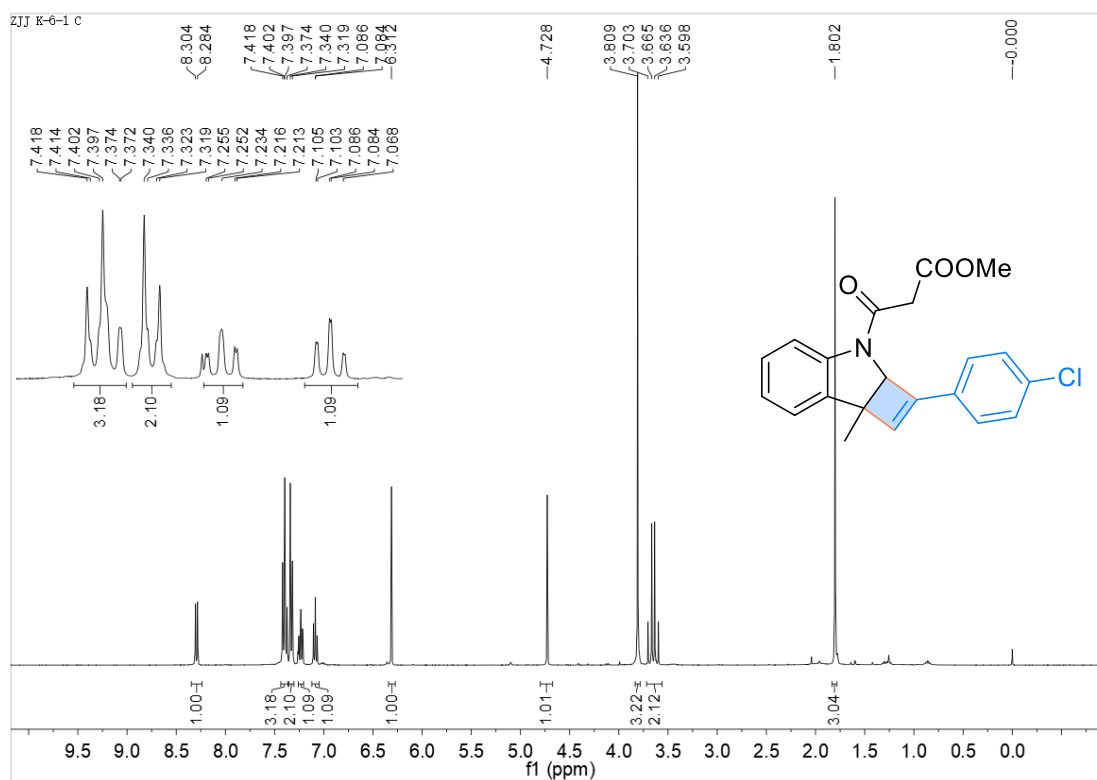

### 3a2 <sup>13</sup>C NMR

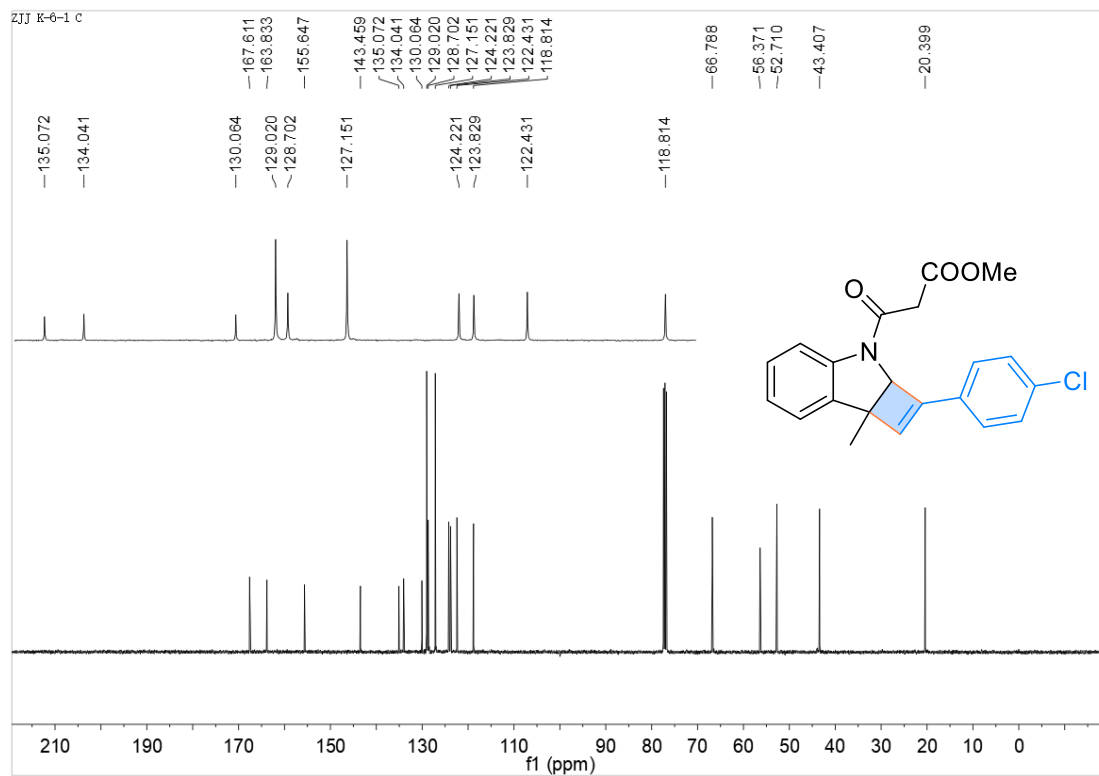

### 3a2 DEPT 90

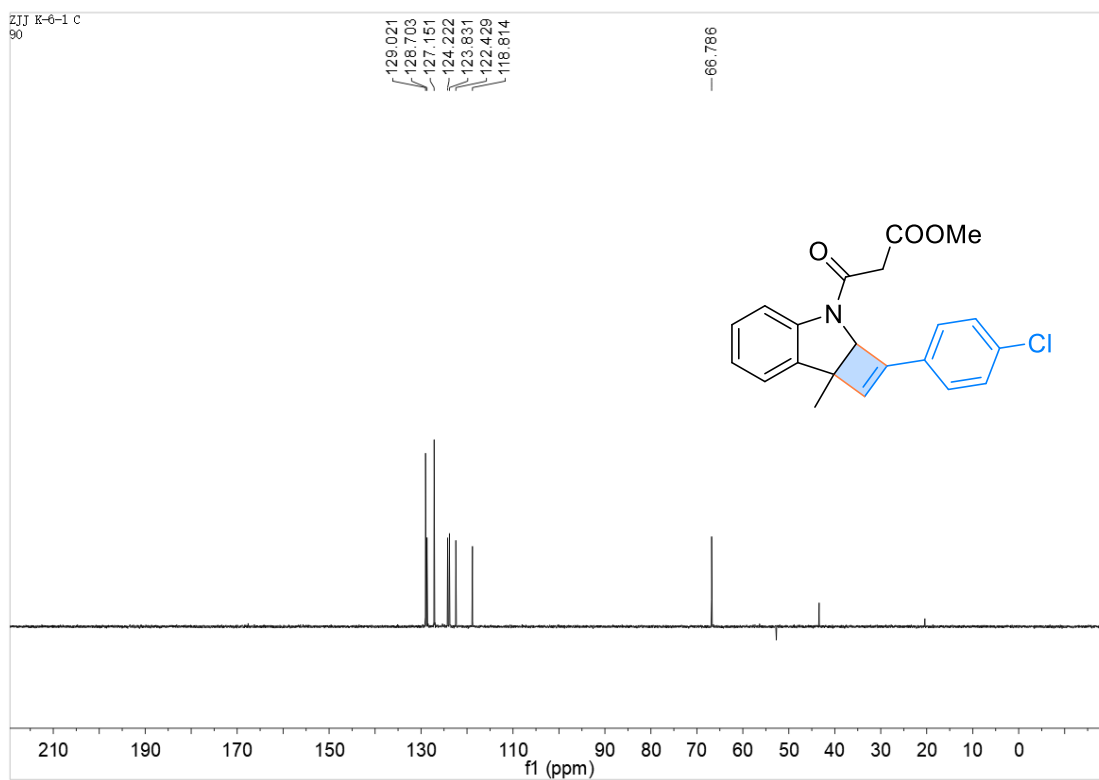

### 3a3 <sup>1</sup>H NMR

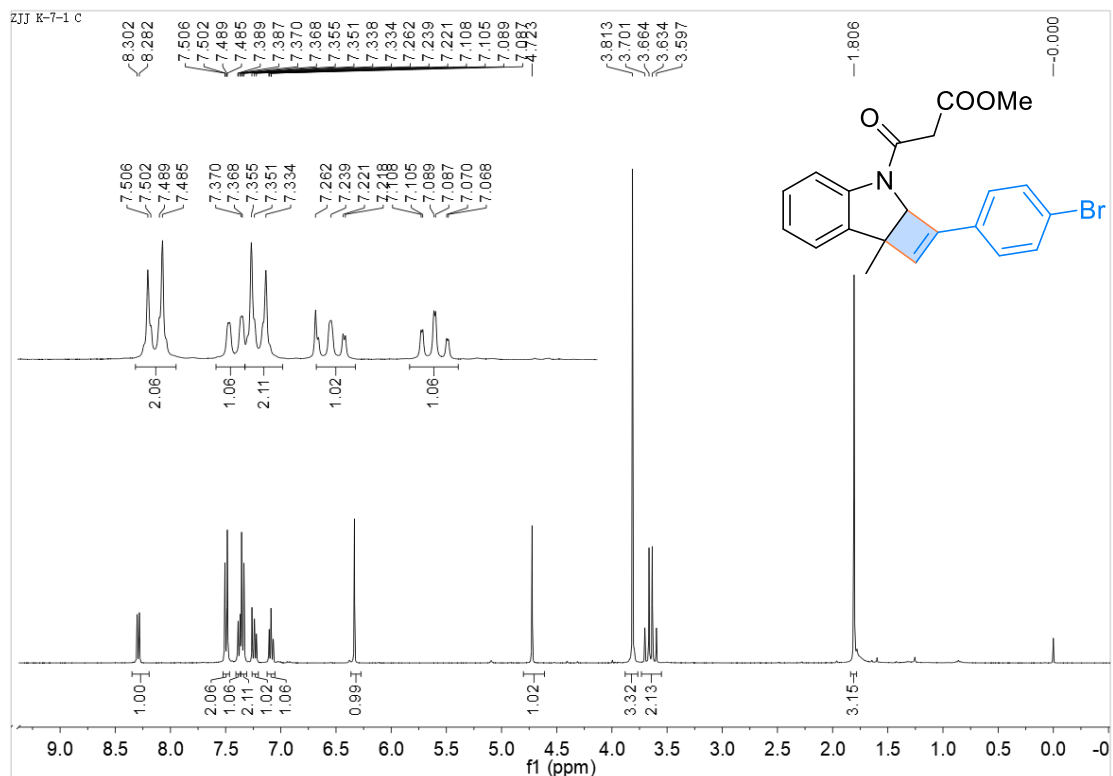

### 3a3 <sup>13</sup>C NMR

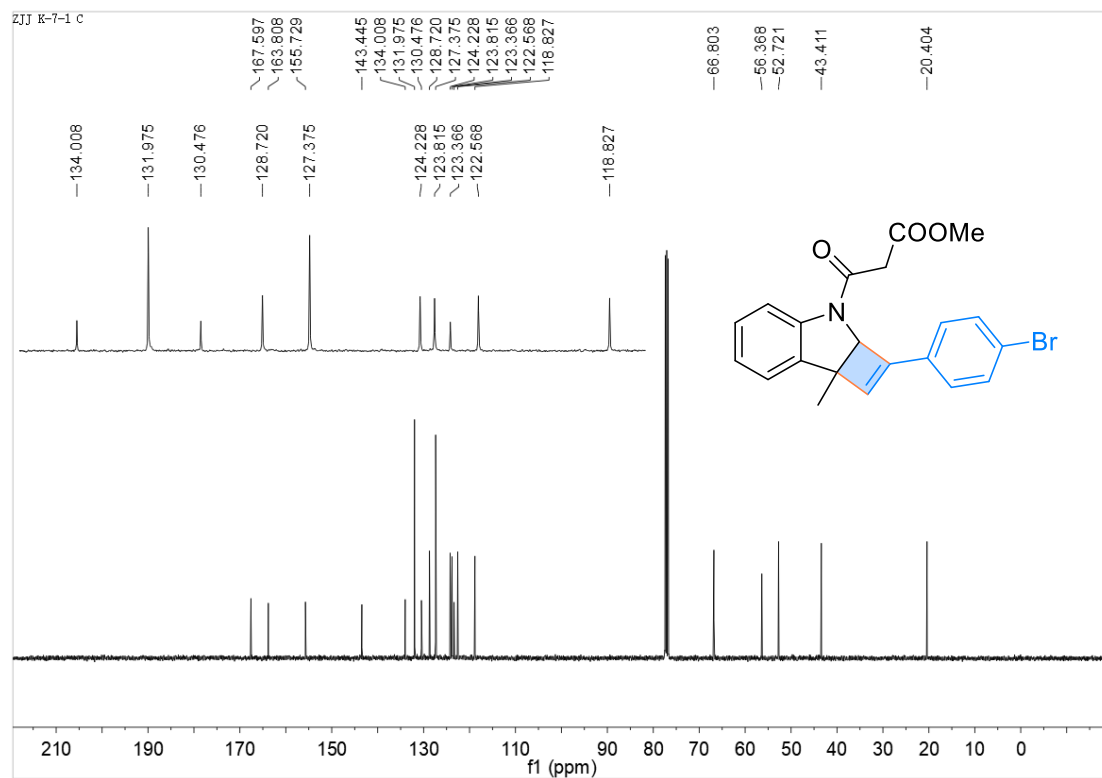



### 3a3 DEPT 90 and DEPT 135

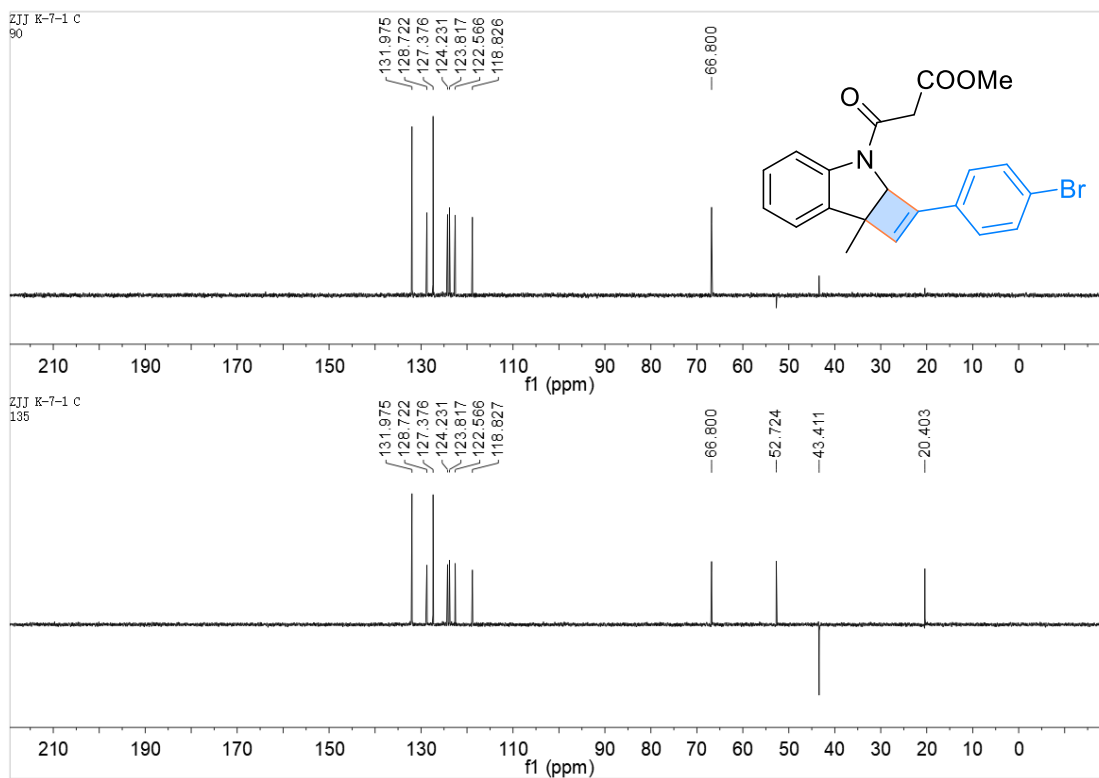

### 3a4 <sup>1</sup>H NMR

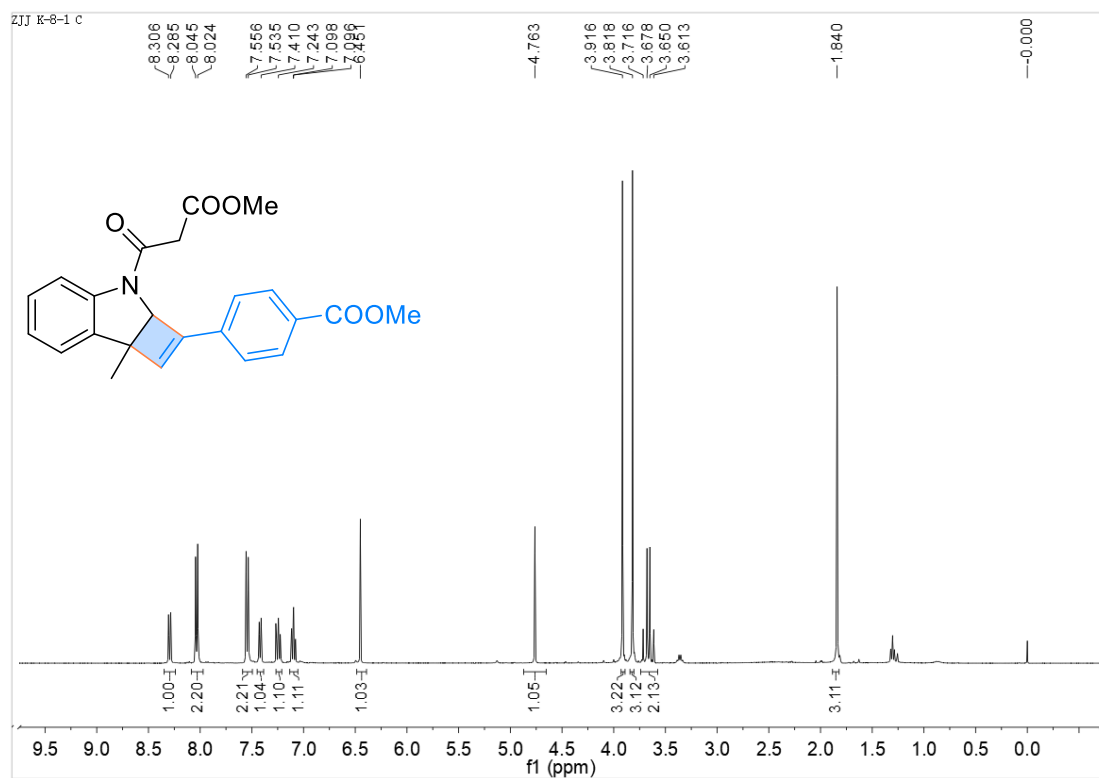

### 3a4 <sup>13</sup>C NMR

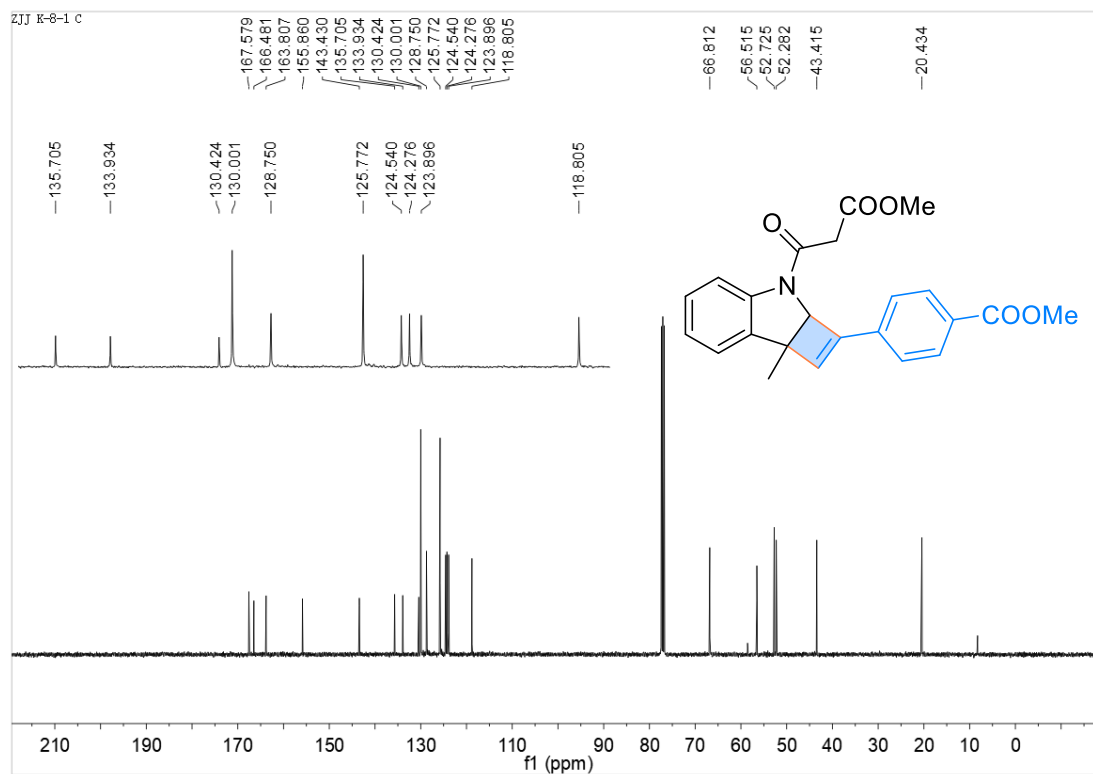

### 3a4 DEPT 90 and DEPT 135

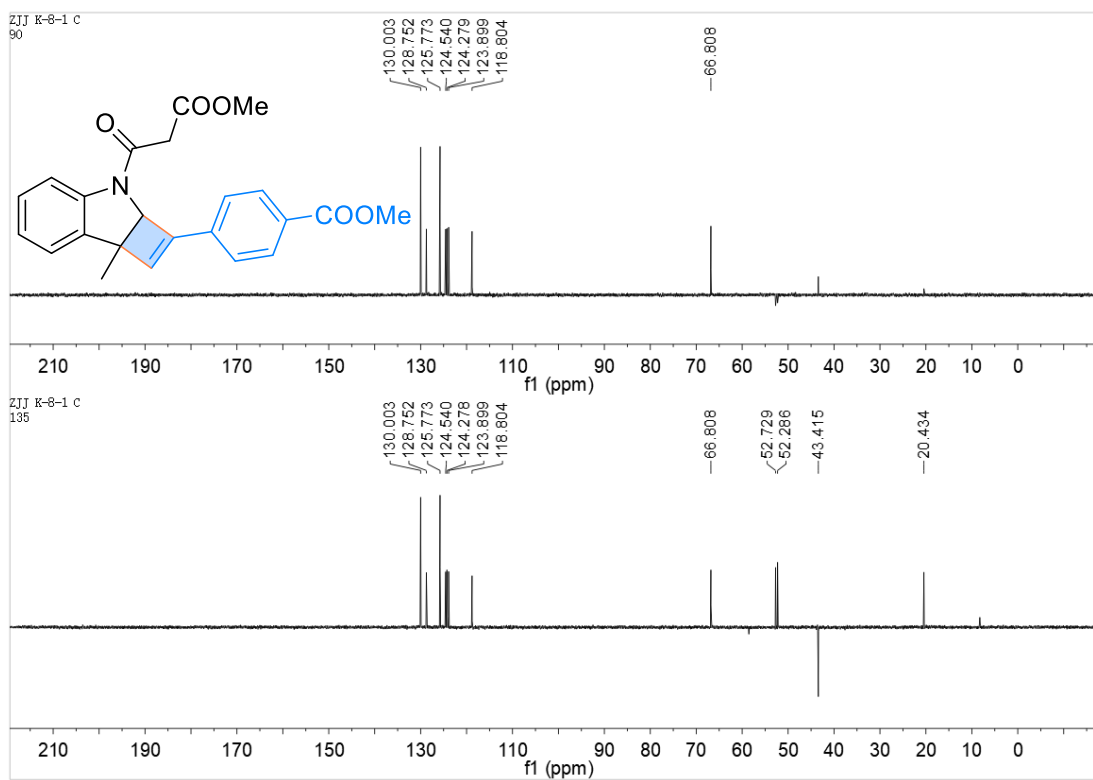

### 3a5 <sup>1</sup>H NMR

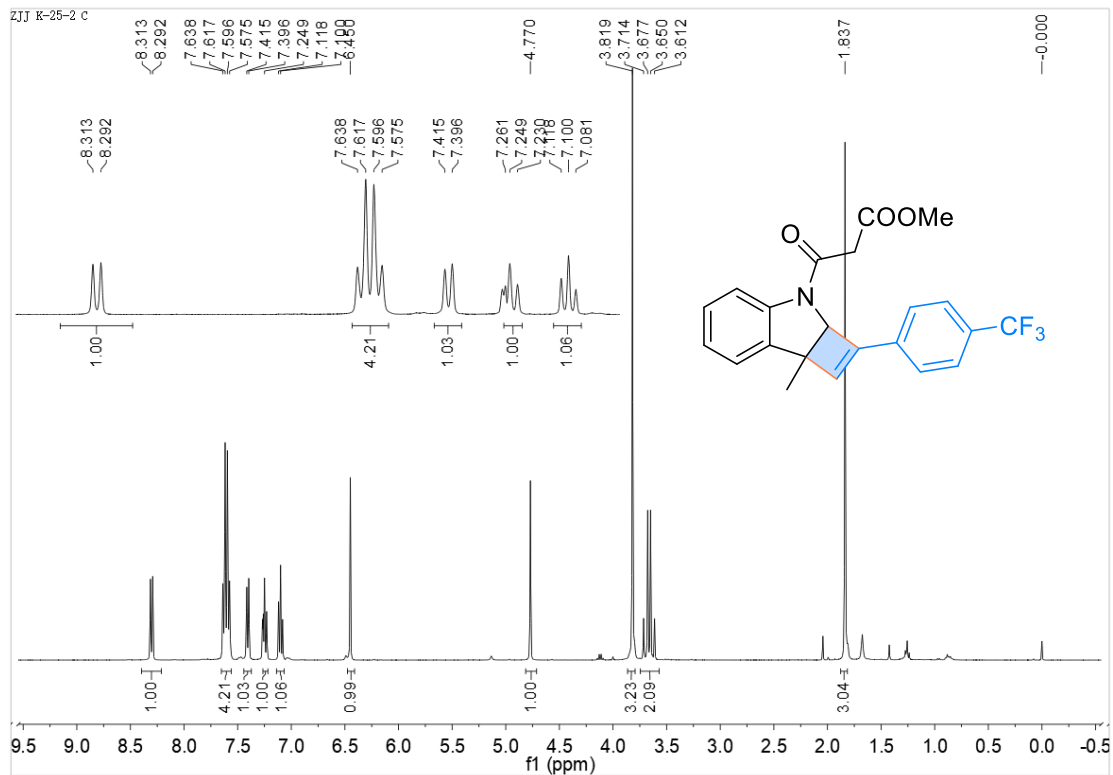

### 3a5 <sup>13</sup>C NMR

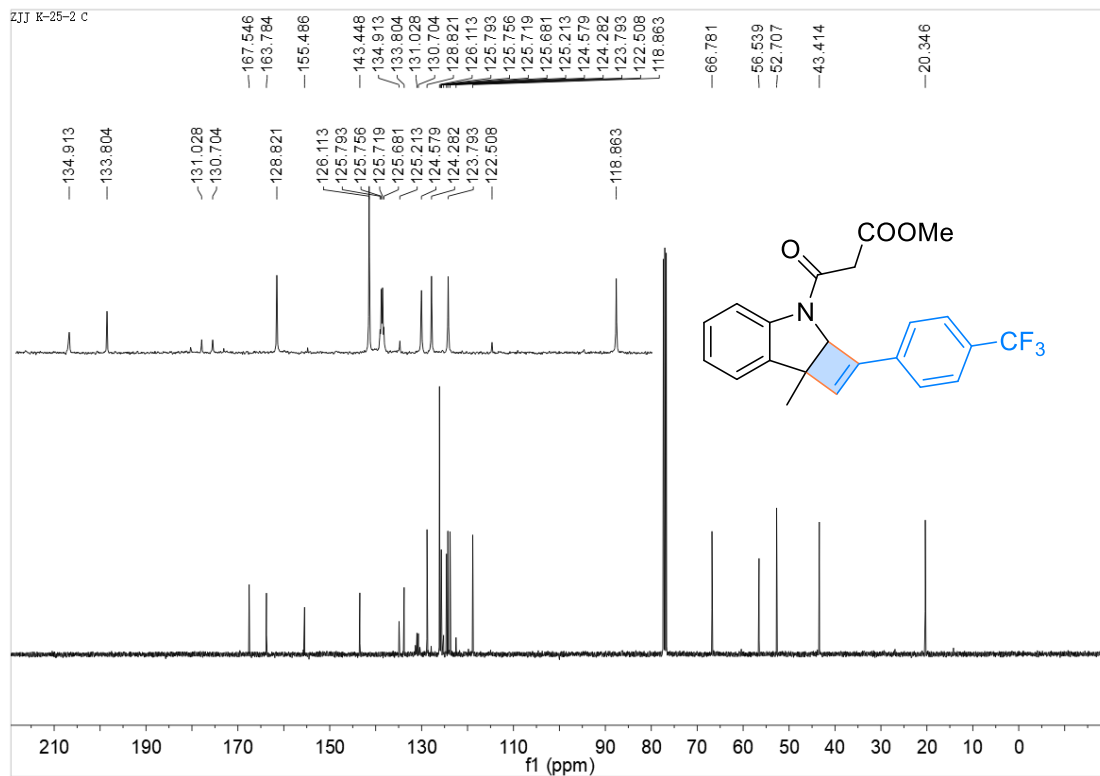

### 3a5 DEPT 90 and DEPT 135

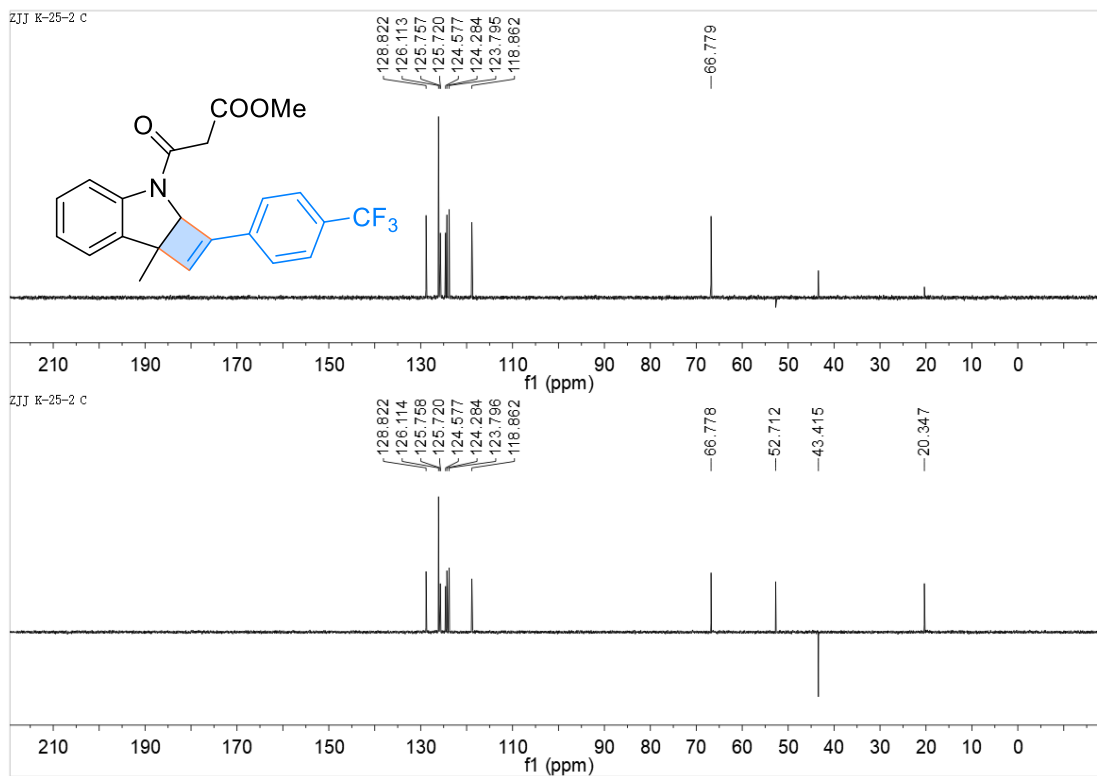

### 3a6 <sup>1</sup>H NMR

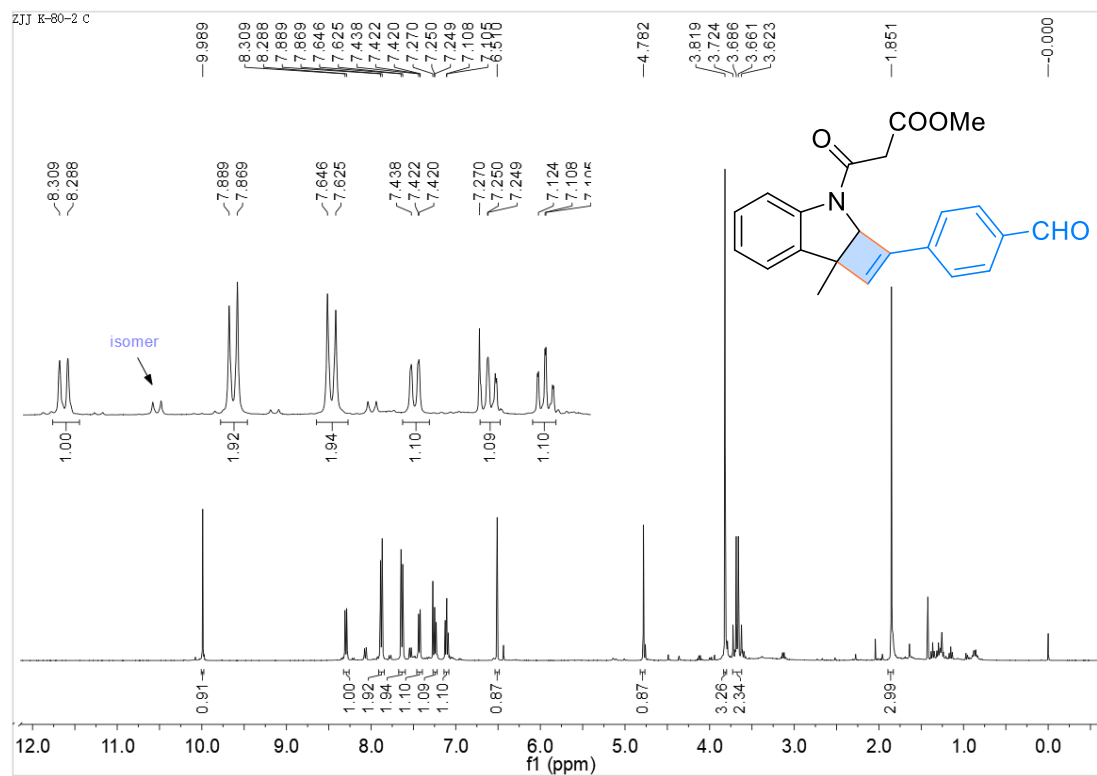

### 3a6 <sup>13</sup>C NMR

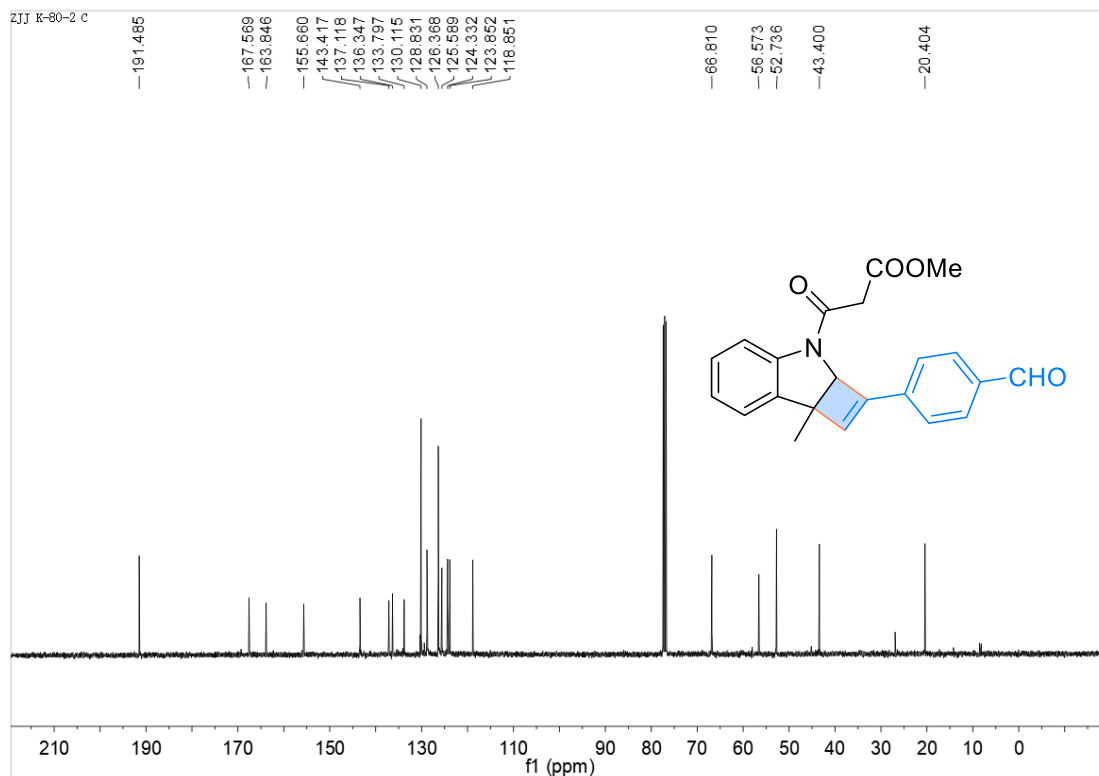

### 3a6 DEPT 90 and DEPT 135

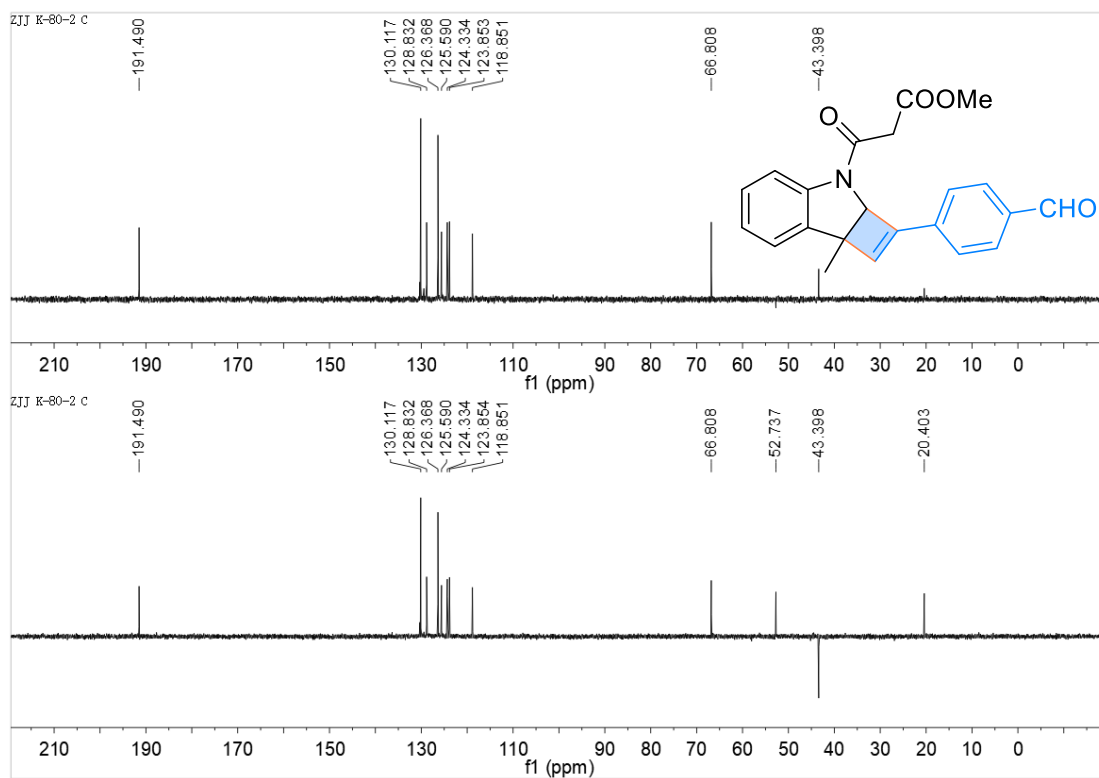

### 3a7 <sup>1</sup>H NMR

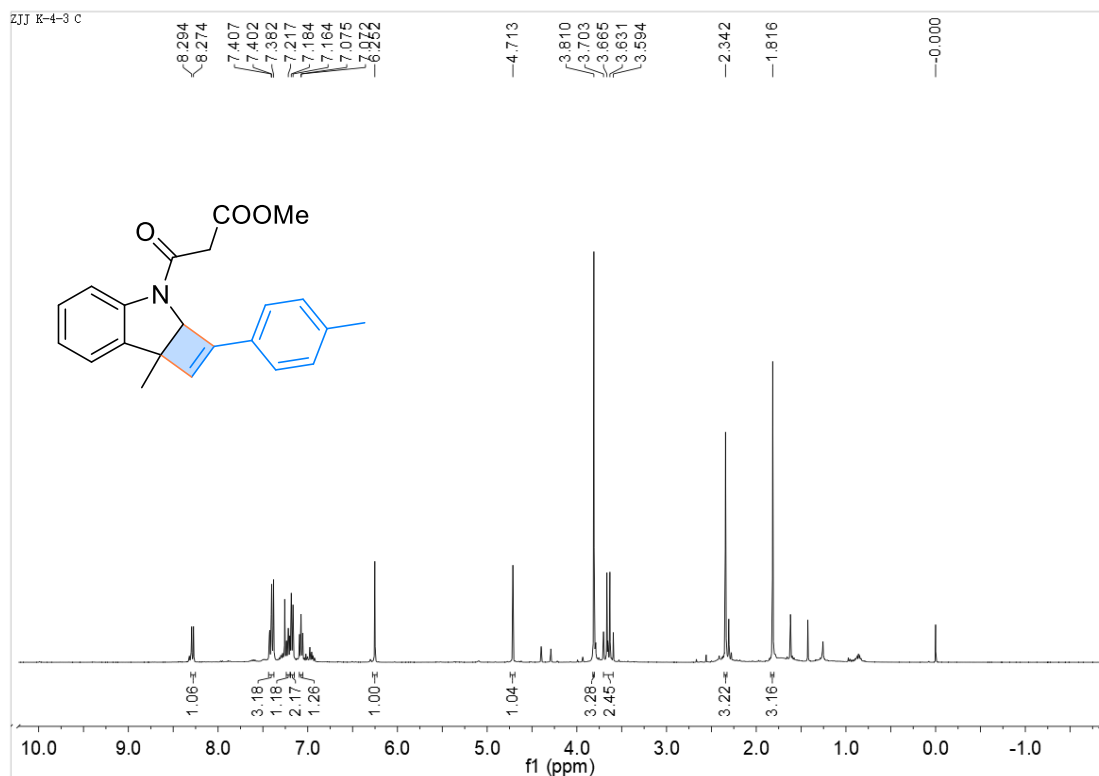

### 3a7 <sup>13</sup>C NMR

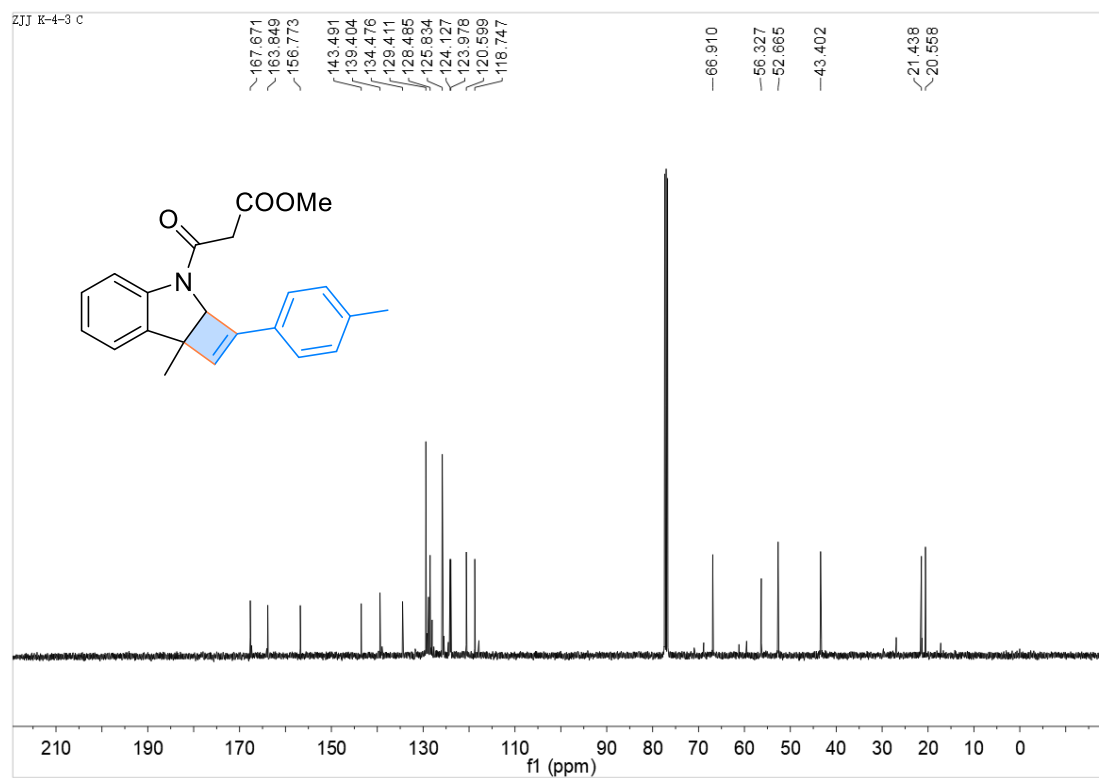

### 3a7 DEPT 90 and DEPT 135

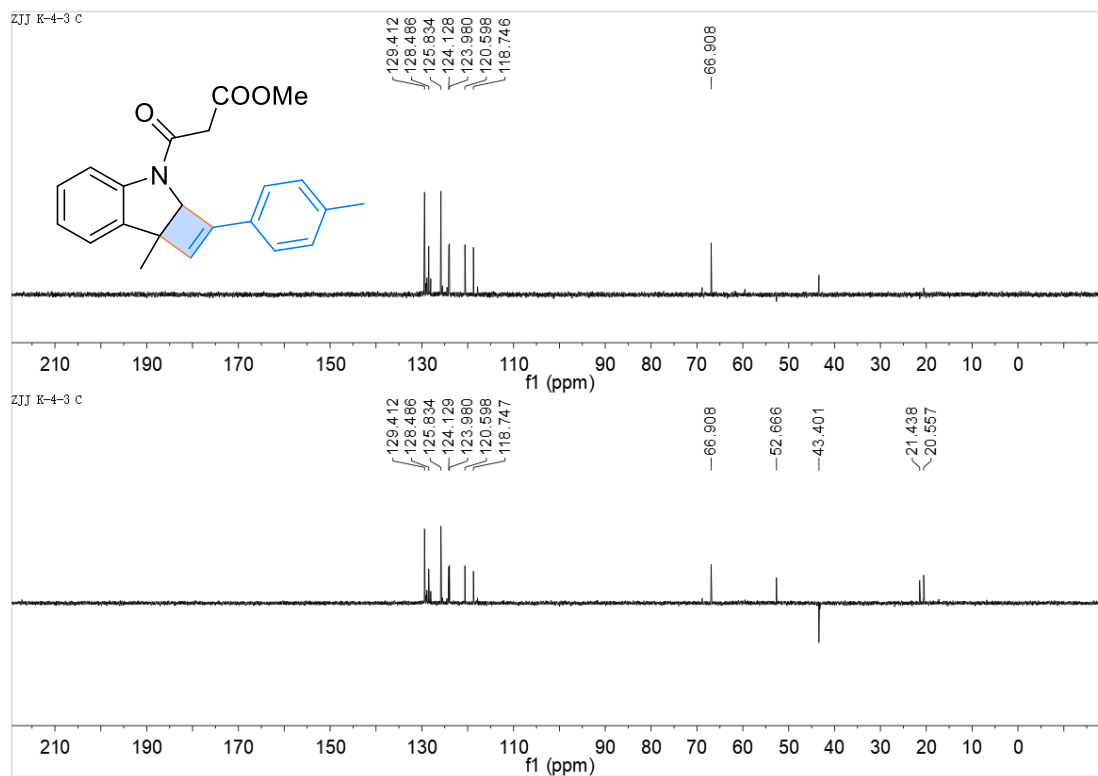

### 3a8 <sup>1</sup>H NMR

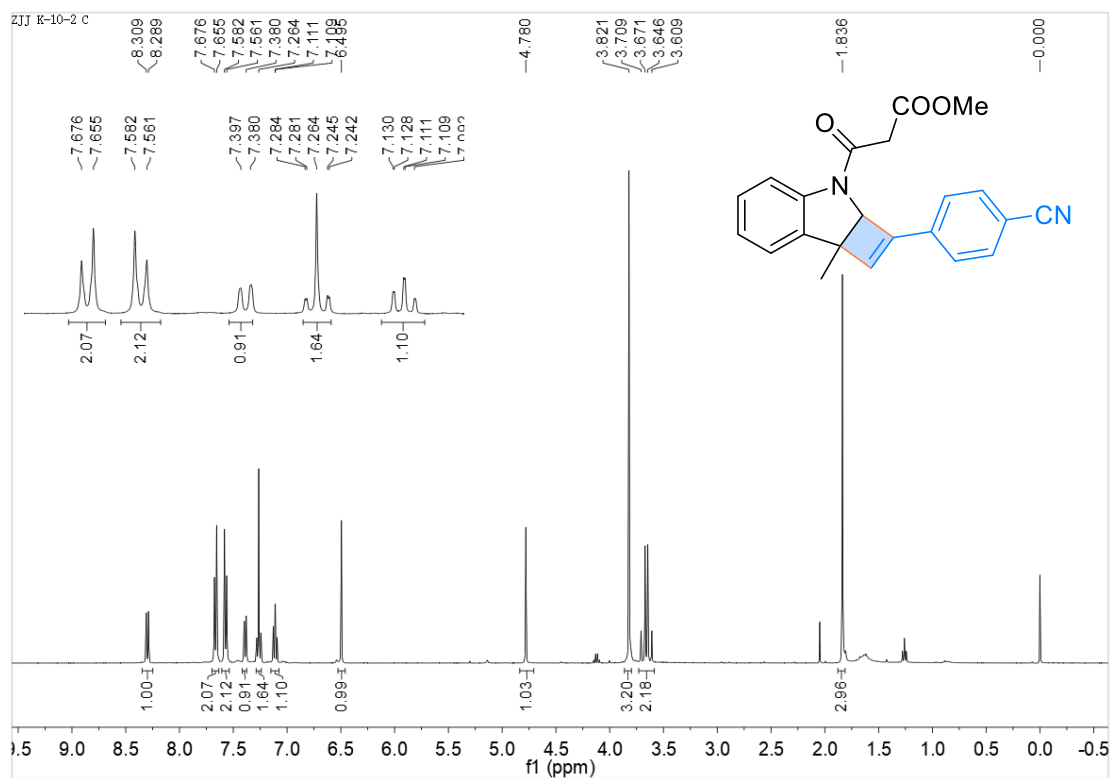

### 3a8 <sup>13</sup>C NMR

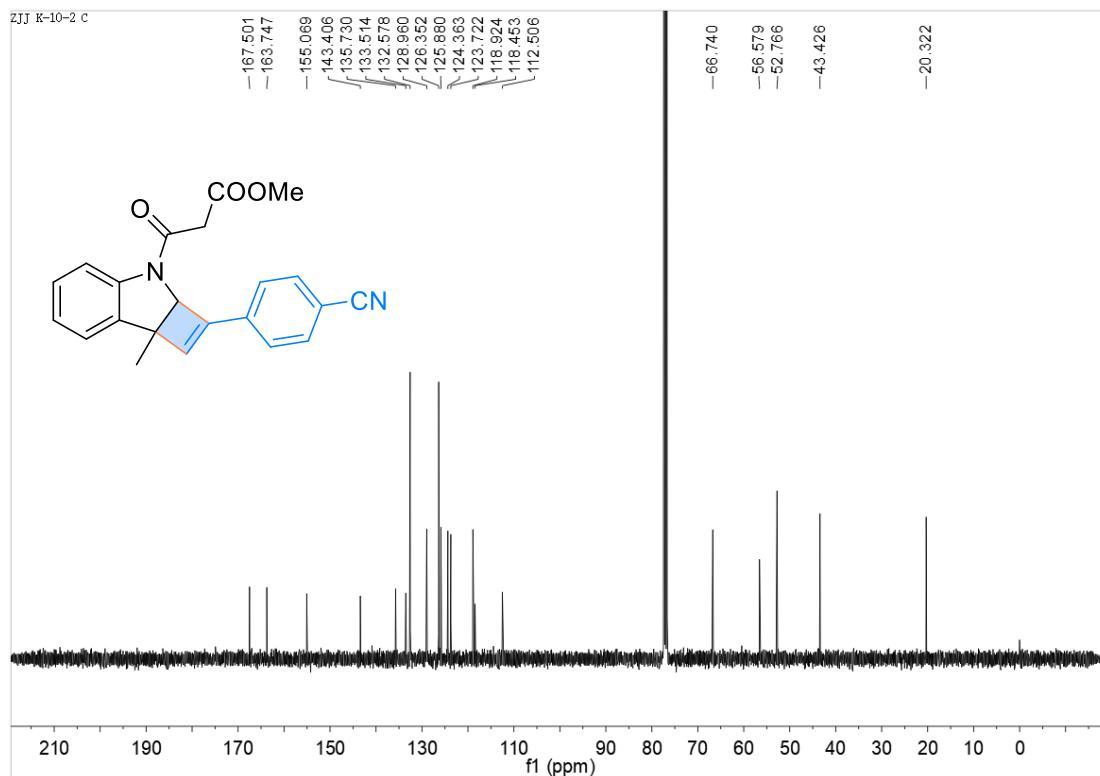

### 3a8 DEPT 90 and DEPT 135

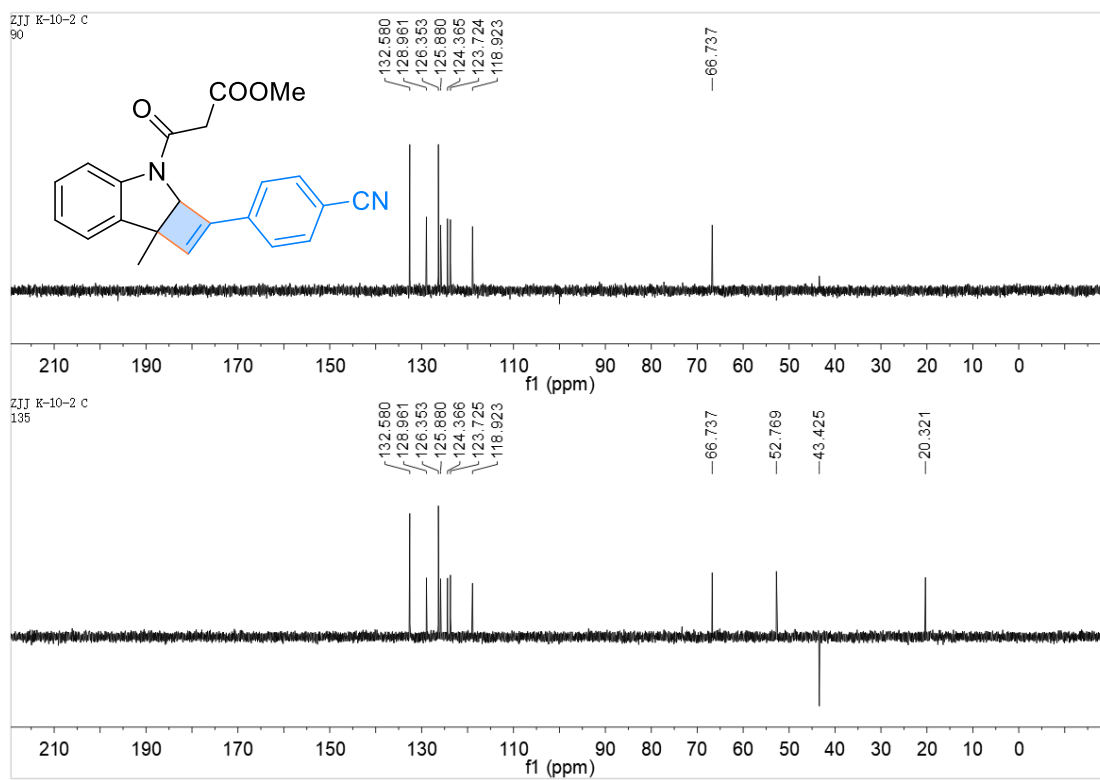



### 3b1 <sup>1</sup>H NMR

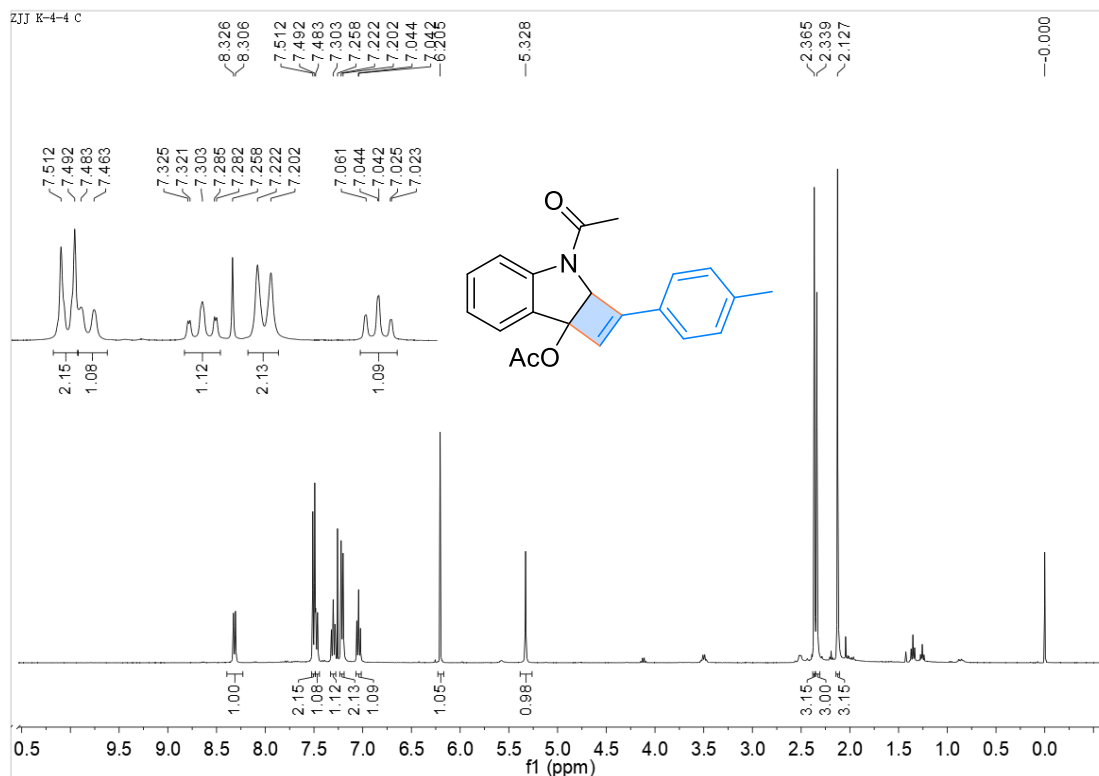

### 3b1 <sup>13</sup>C NMR

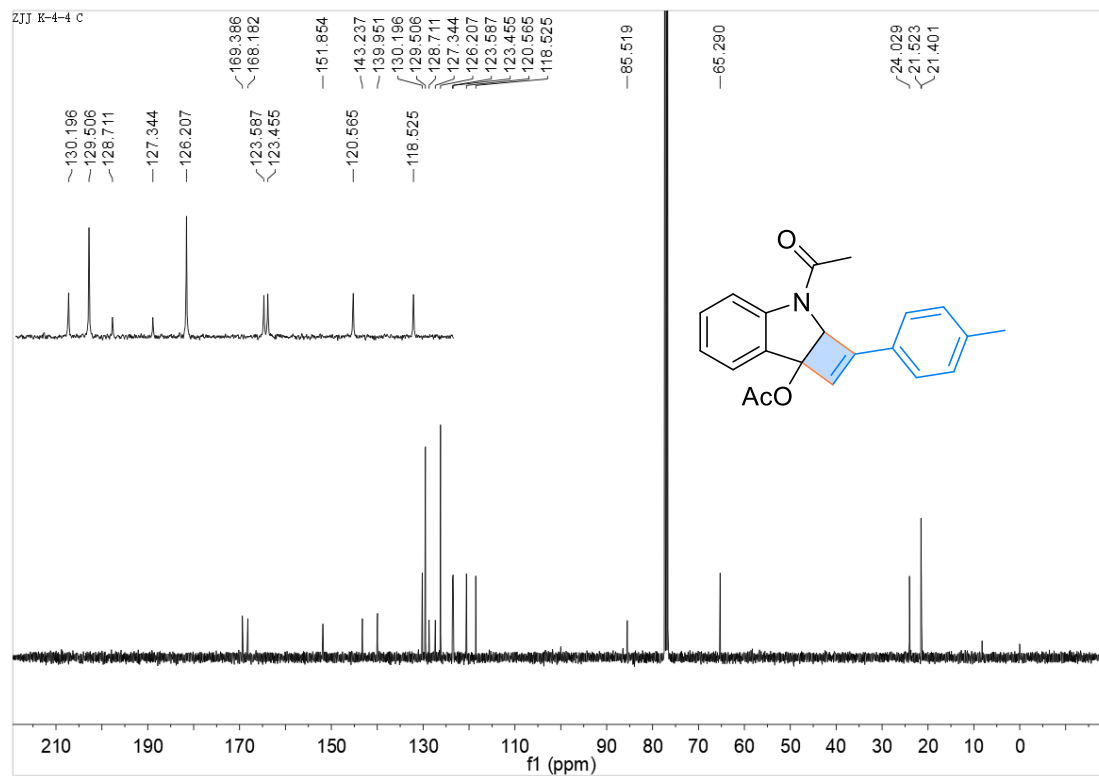

### 3b1 DEPT 90 and DEPT 135

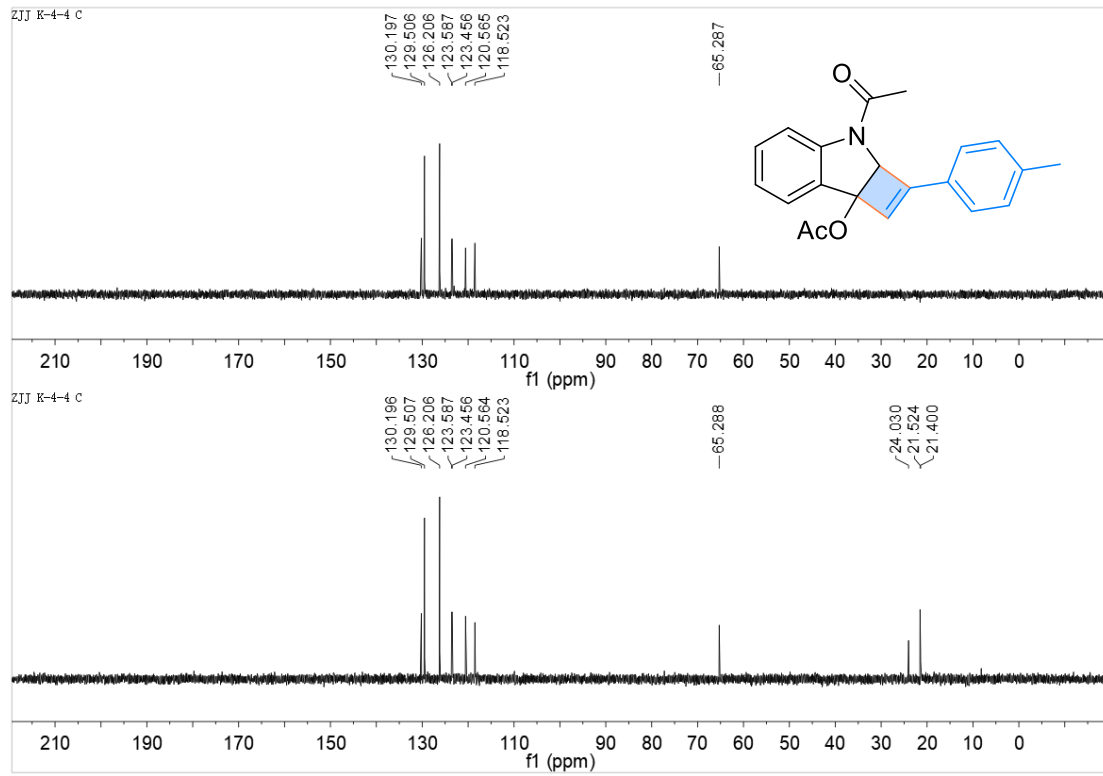

### 3b2 <sup>1</sup>H NMR

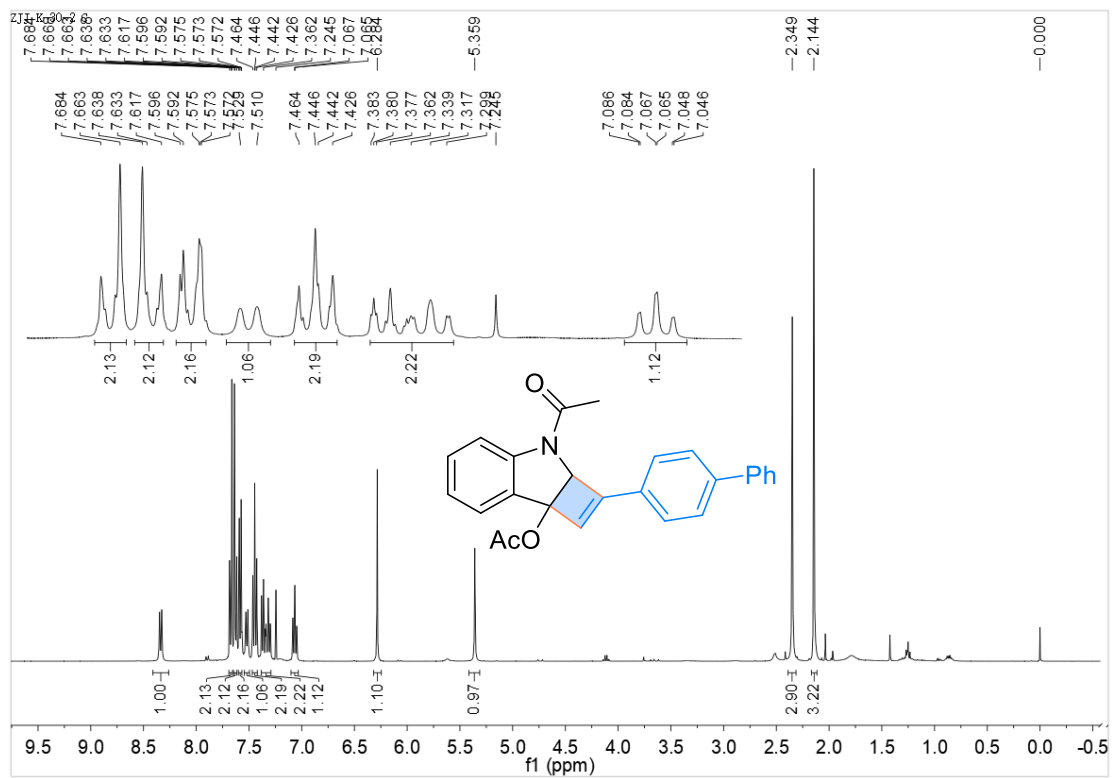

### 3b2 <sup>13</sup>C NMR

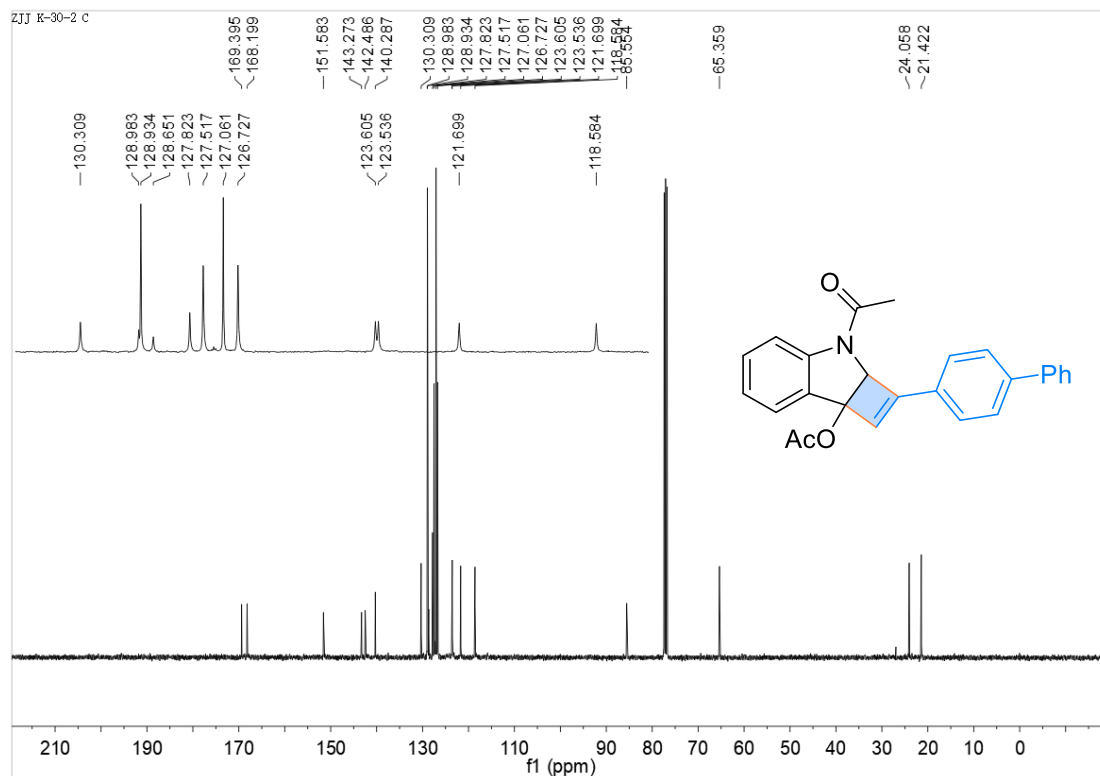

### 3b2 DEPT 90 and DEPT 135

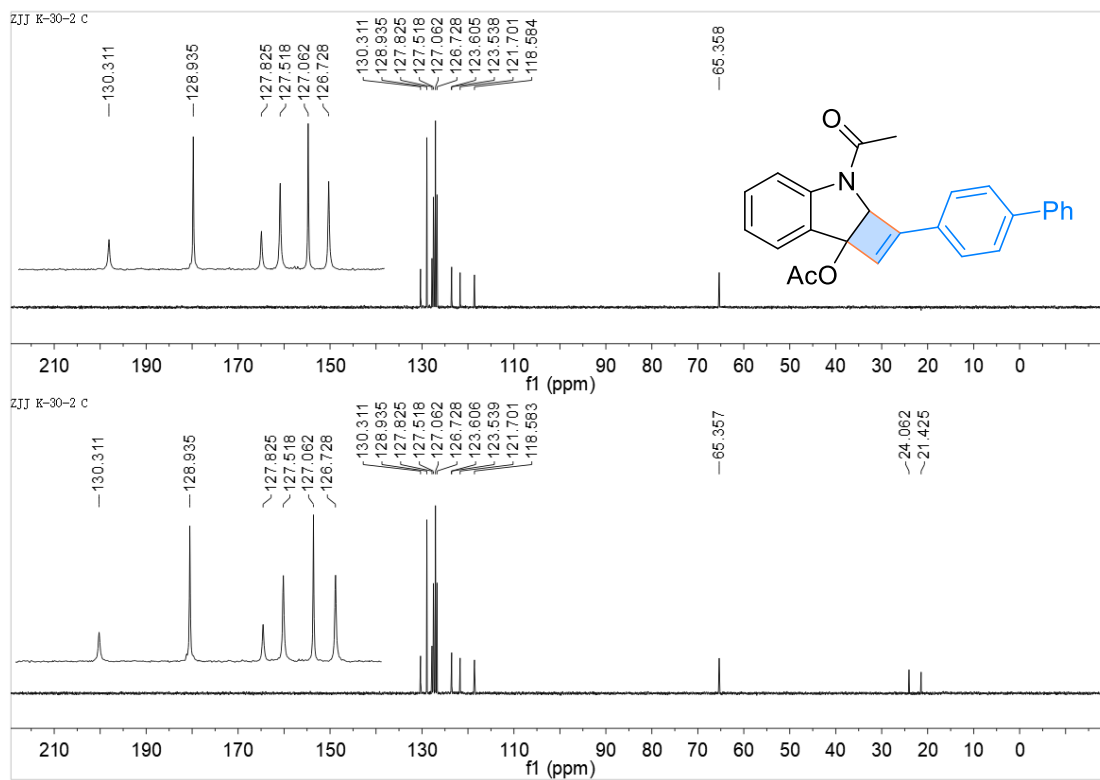

### 3c <sup>1</sup>H NMR

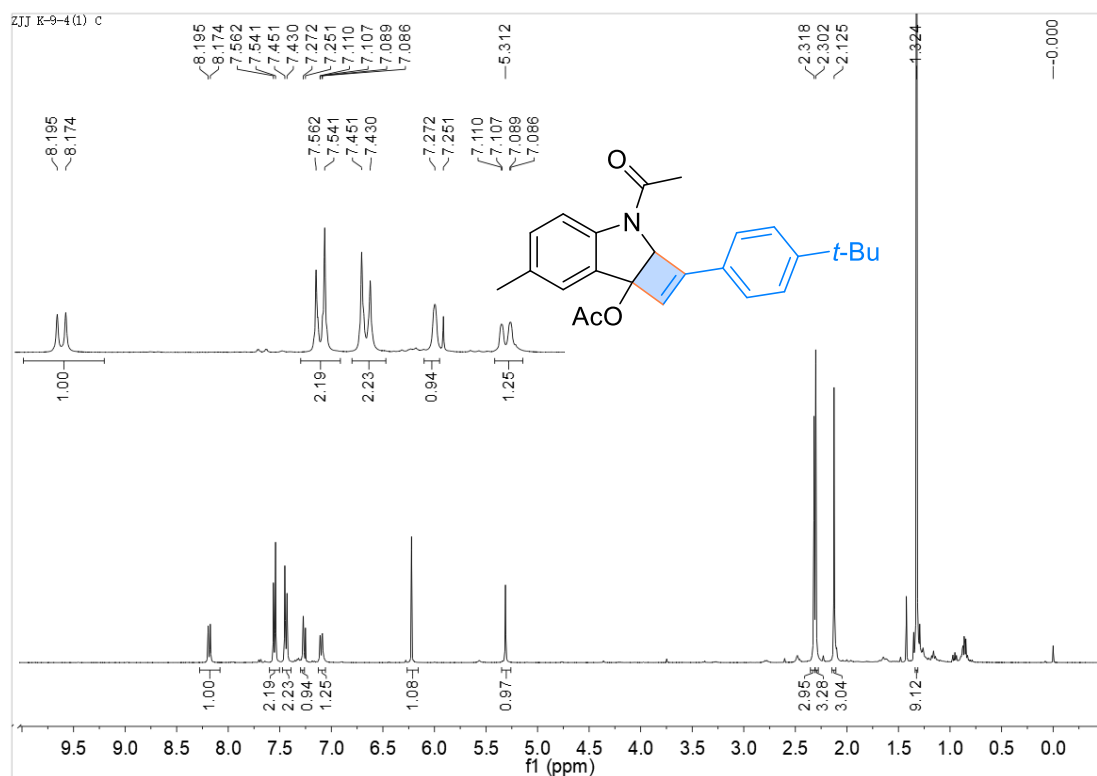

### 3c <sup>13</sup>C NMR

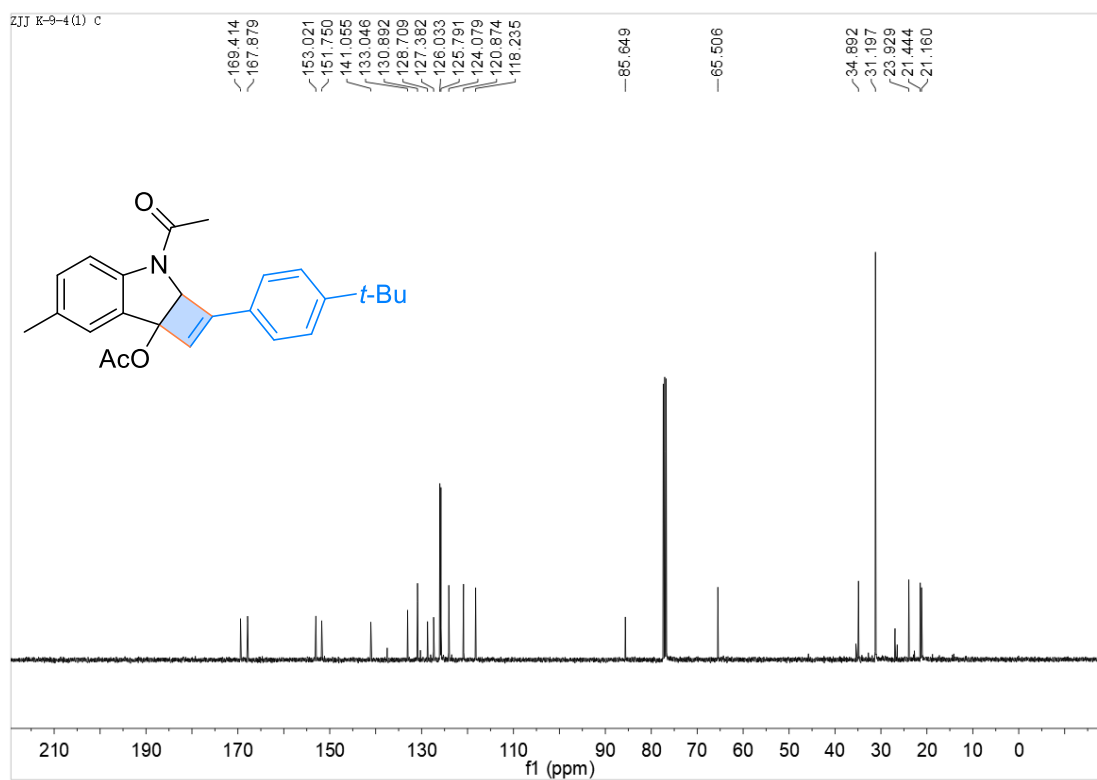

### 3c DEPT 90 and DEPT 135

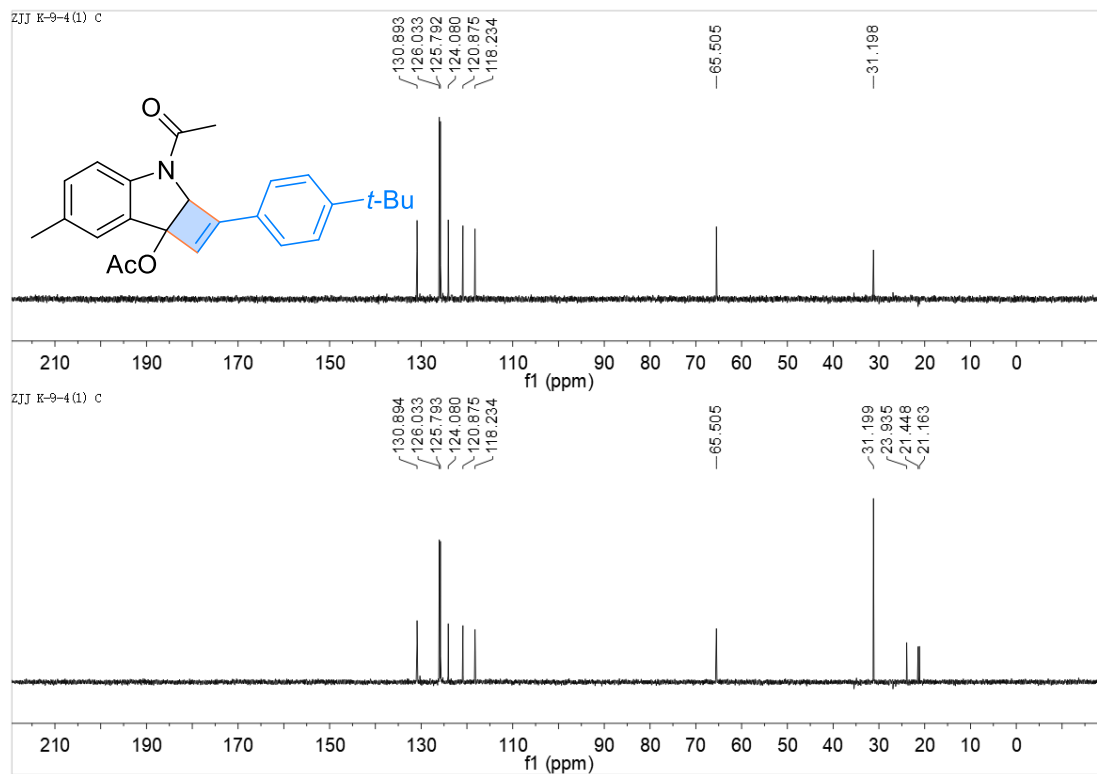

### 3d1 <sup>1</sup>H NMR

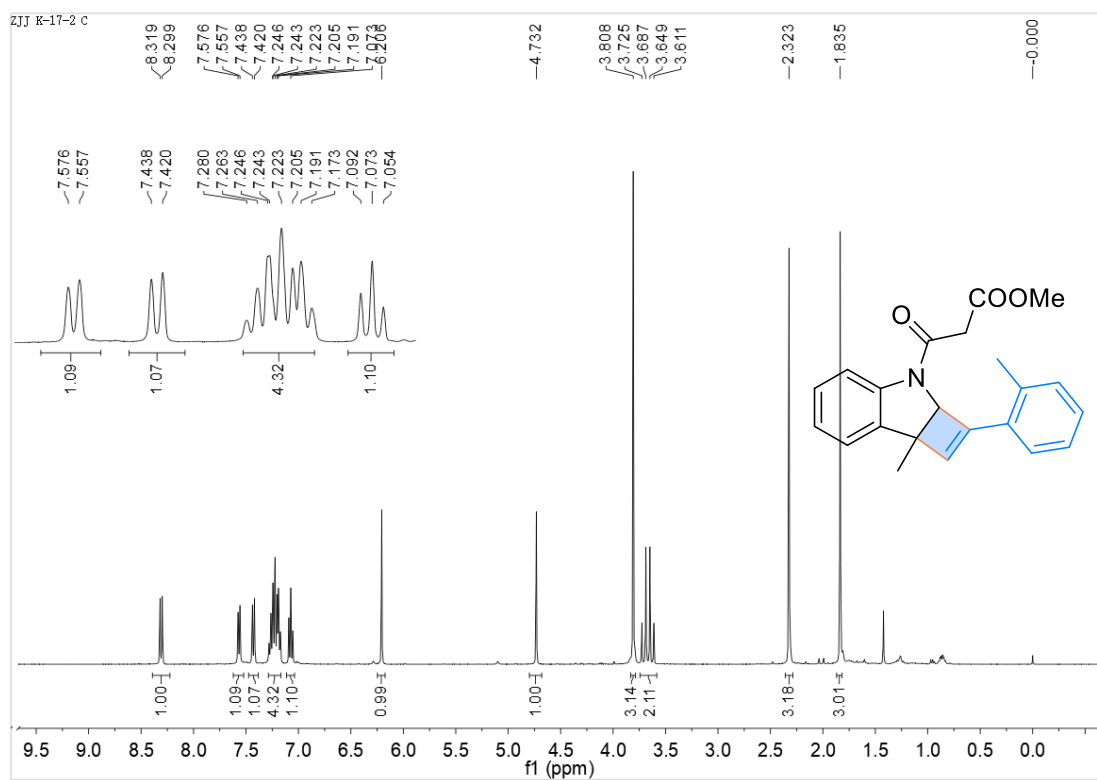

### 3d1 <sup>13</sup>C NMR

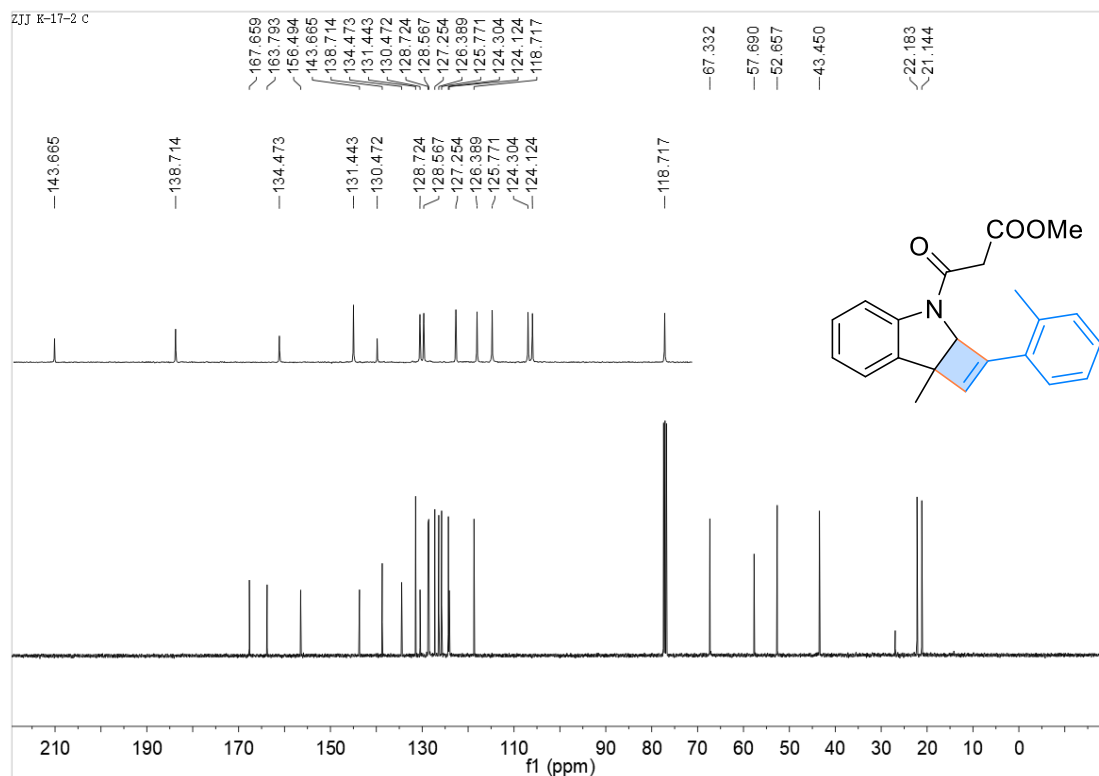

### 3d1 DEPT 90 and DEPT 135

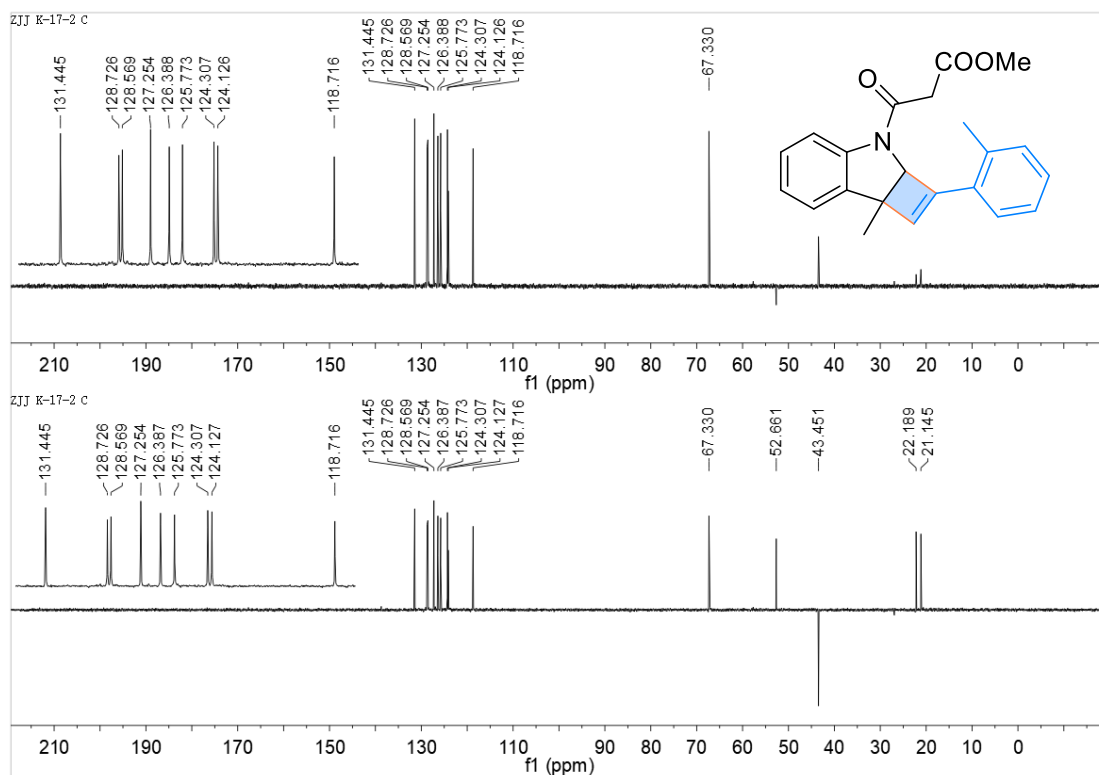

### 3d2 <sup>1</sup>H NMR

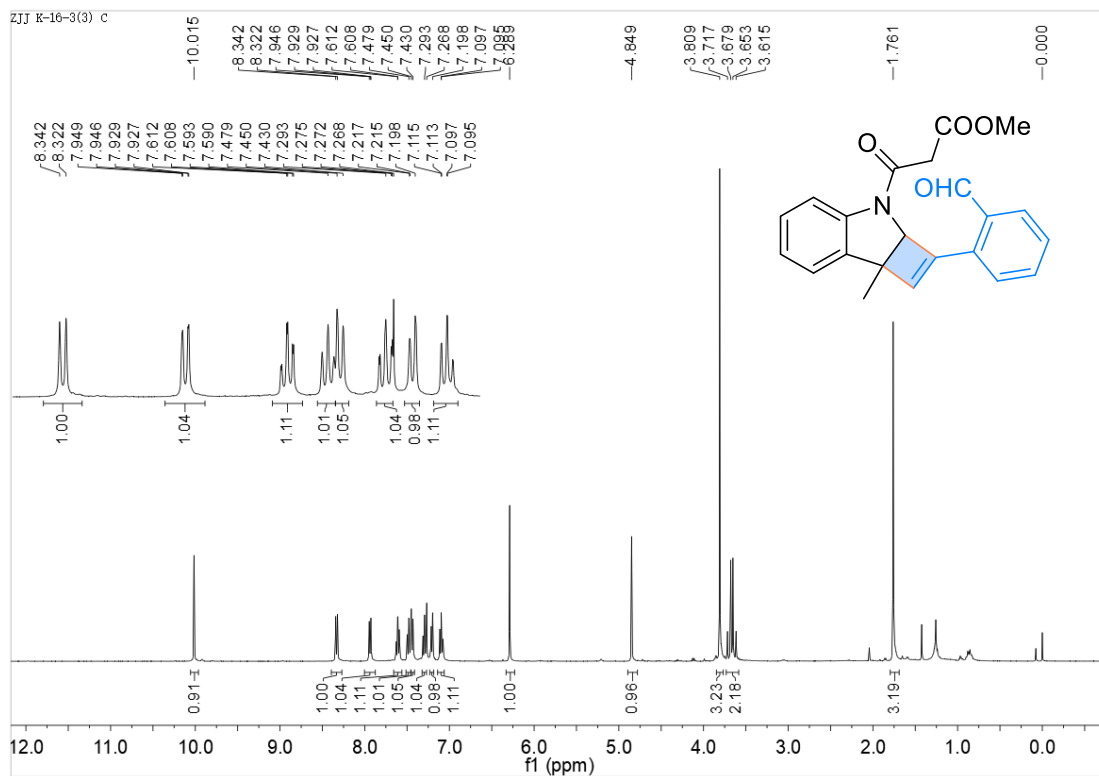

### 3d2 <sup>13</sup>C NMR

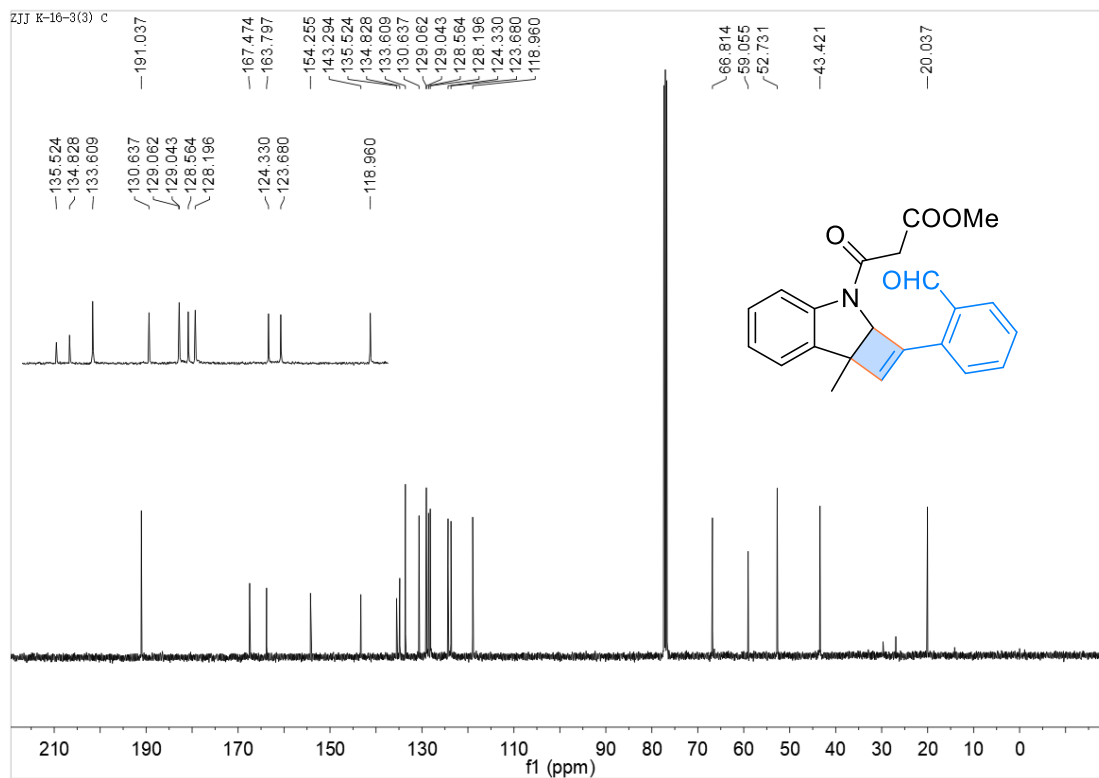

### 3d2 DEPT 90 and DEPT 135

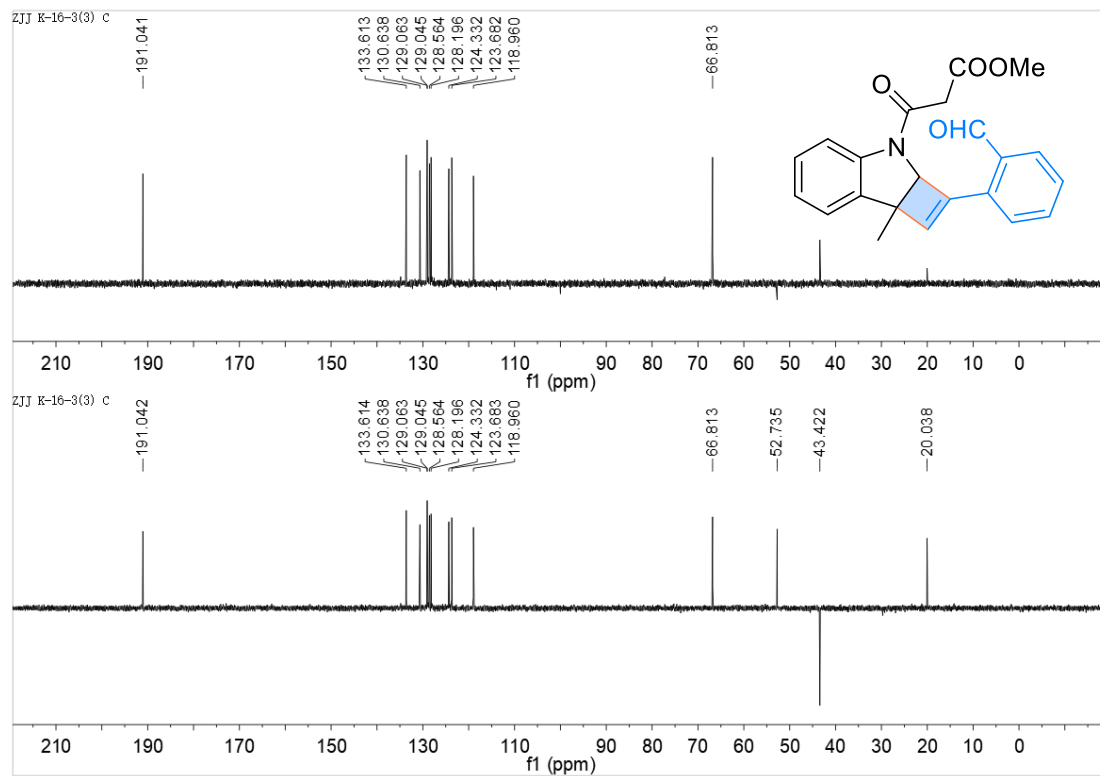

### 3d3 <sup>1</sup>H NMR

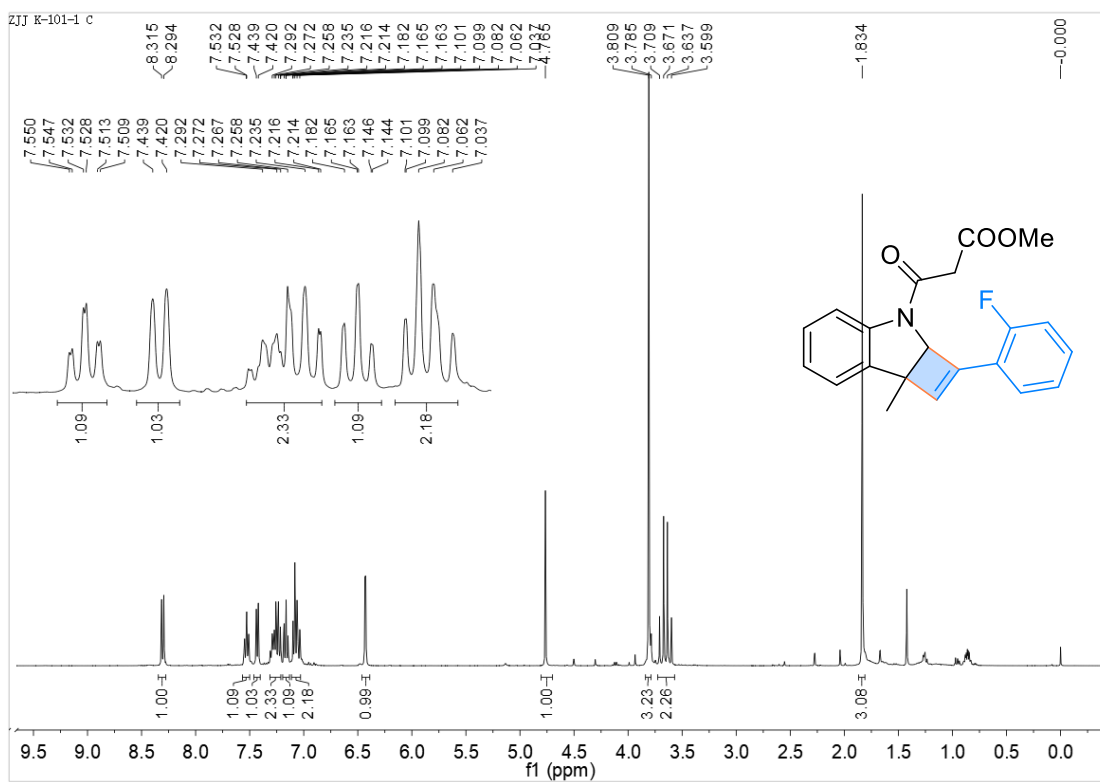



### 3d3 <sup>13</sup>C NMR

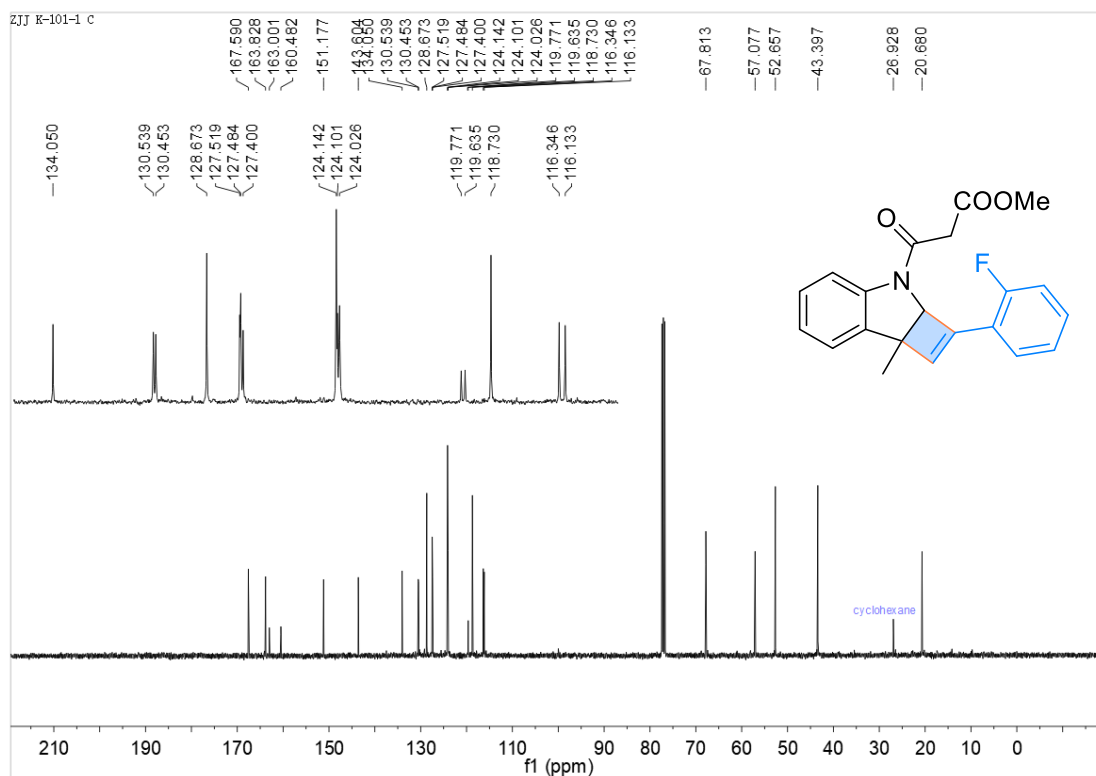

### 3d3 DEPT 90 and DEPT 135

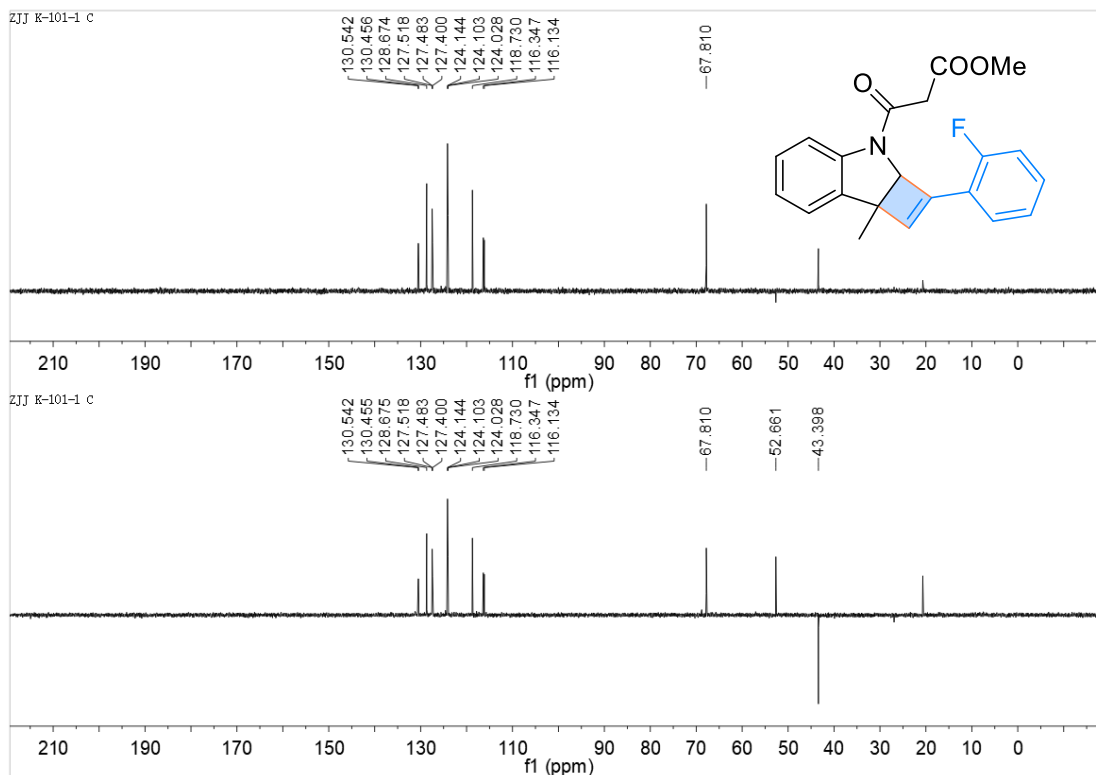

### 3d3 <sup>19</sup>F NMR

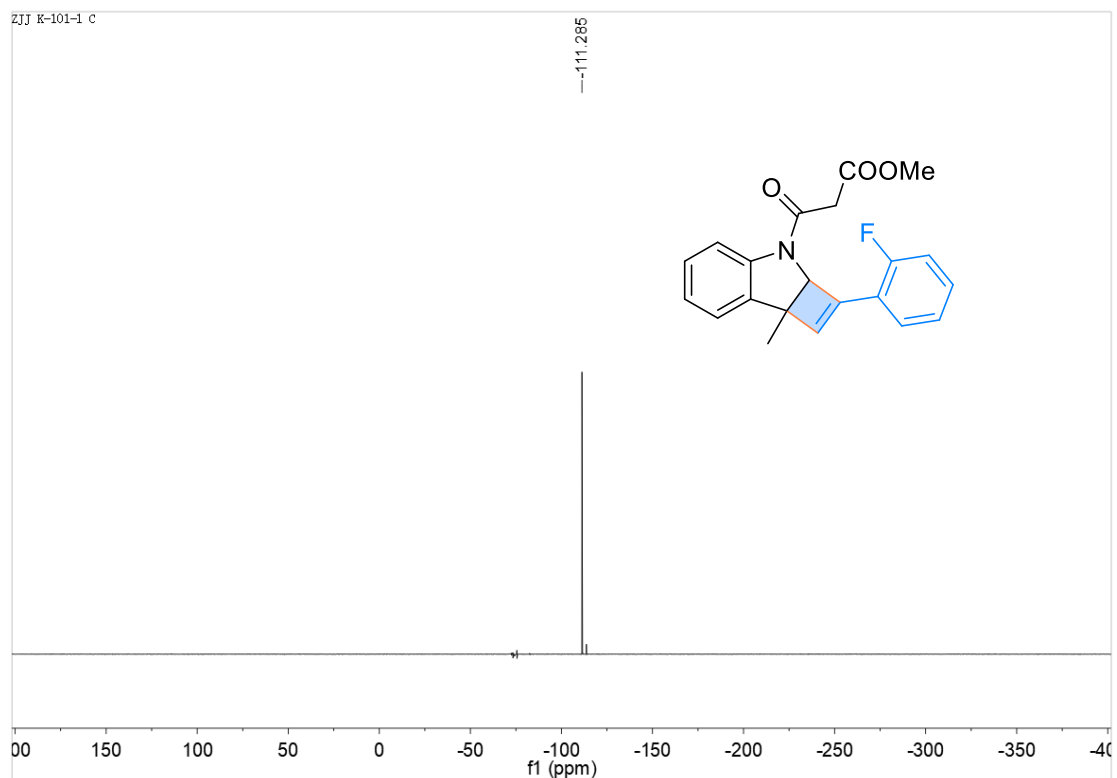

### 3e1 <sup>1</sup>H NMR

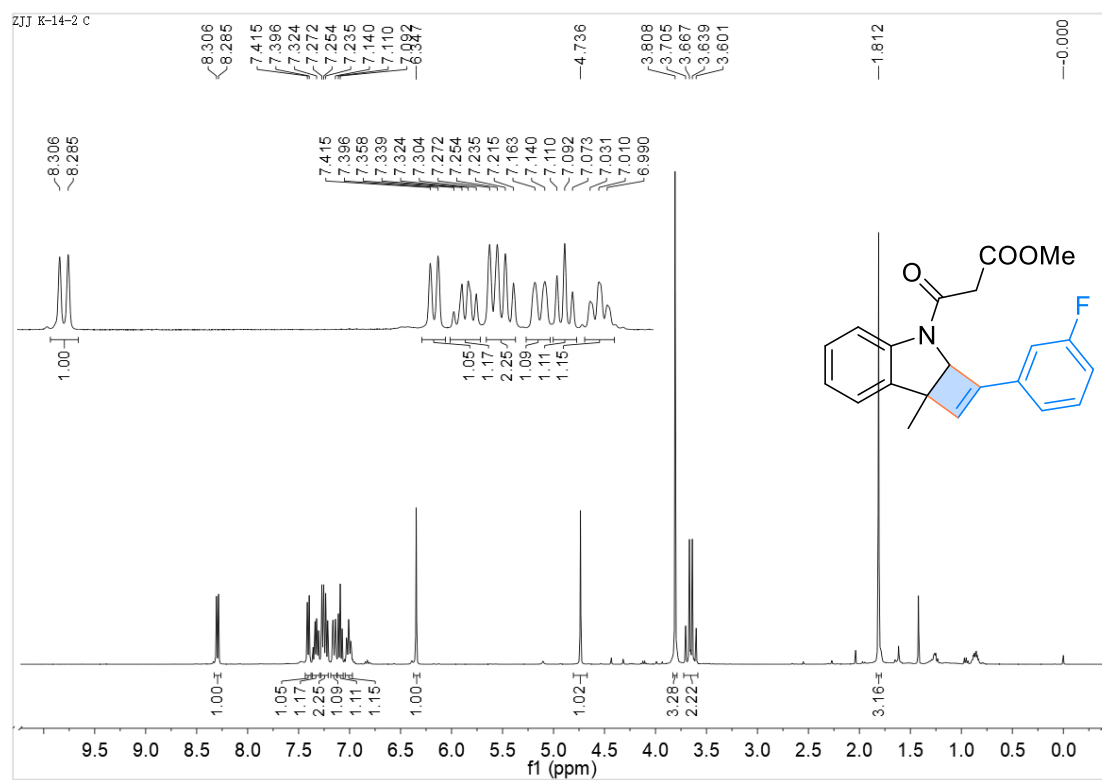

### 3e1 <sup>13</sup>C NMR

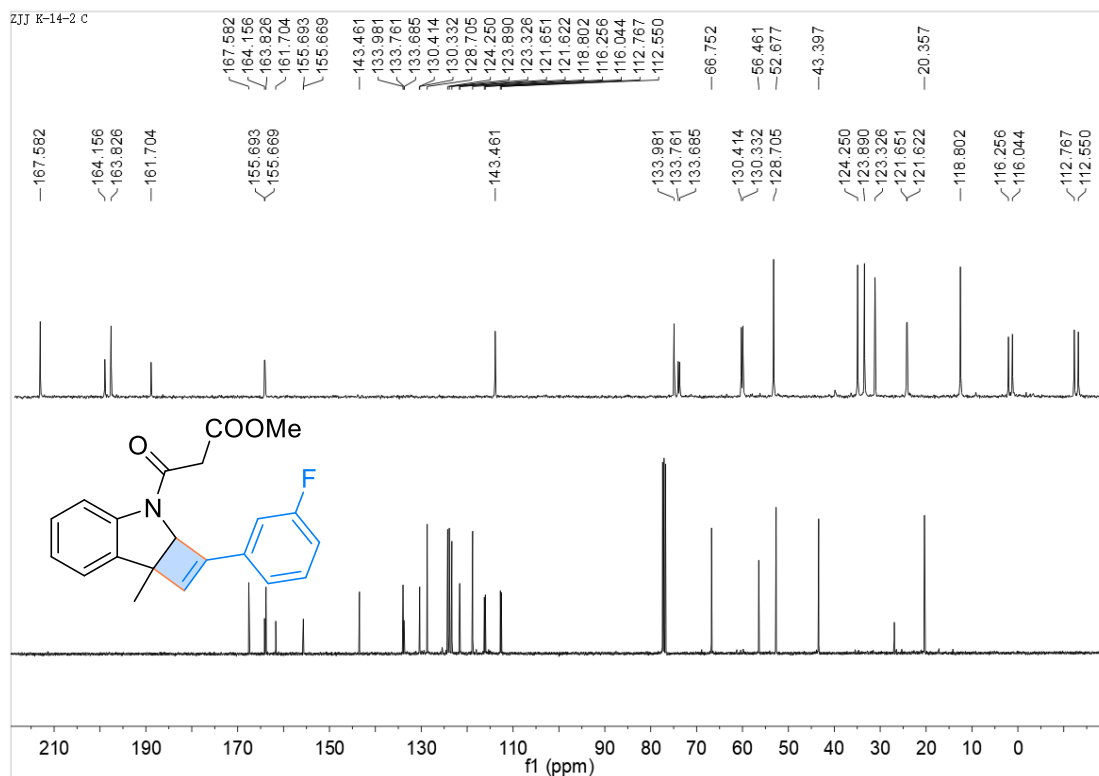

### 3e1 DEPT 90 and DEPT 135

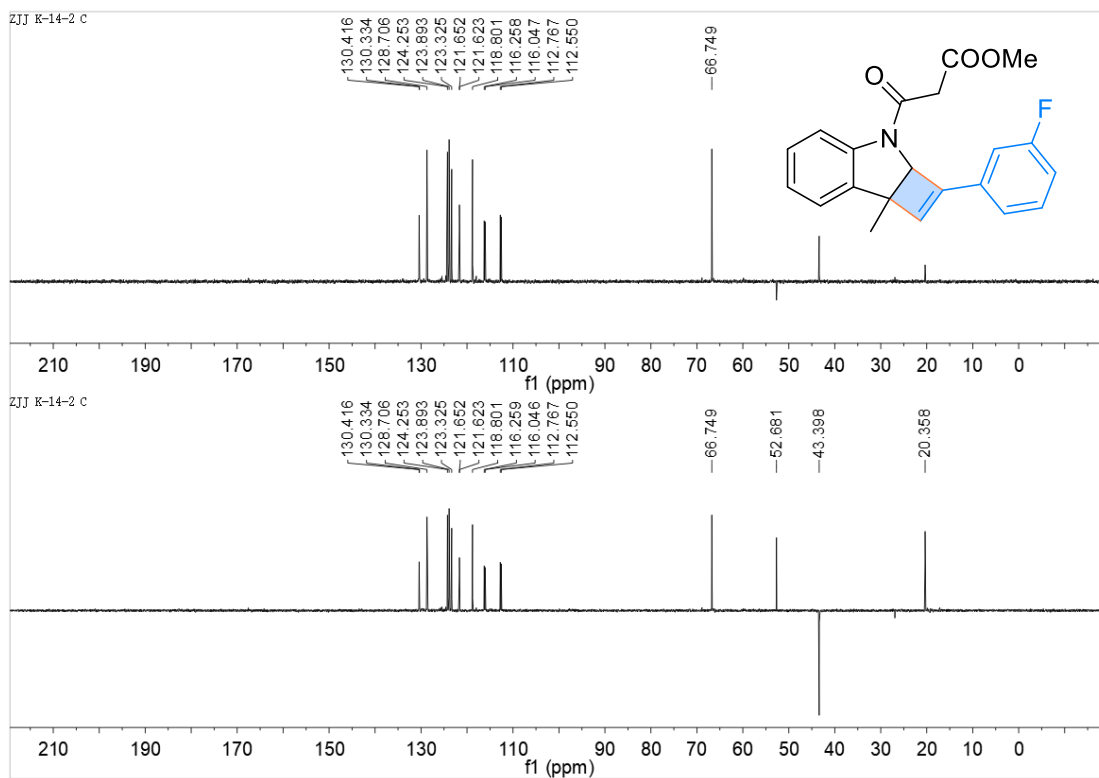

### 3e2 <sup>1</sup>H NMR

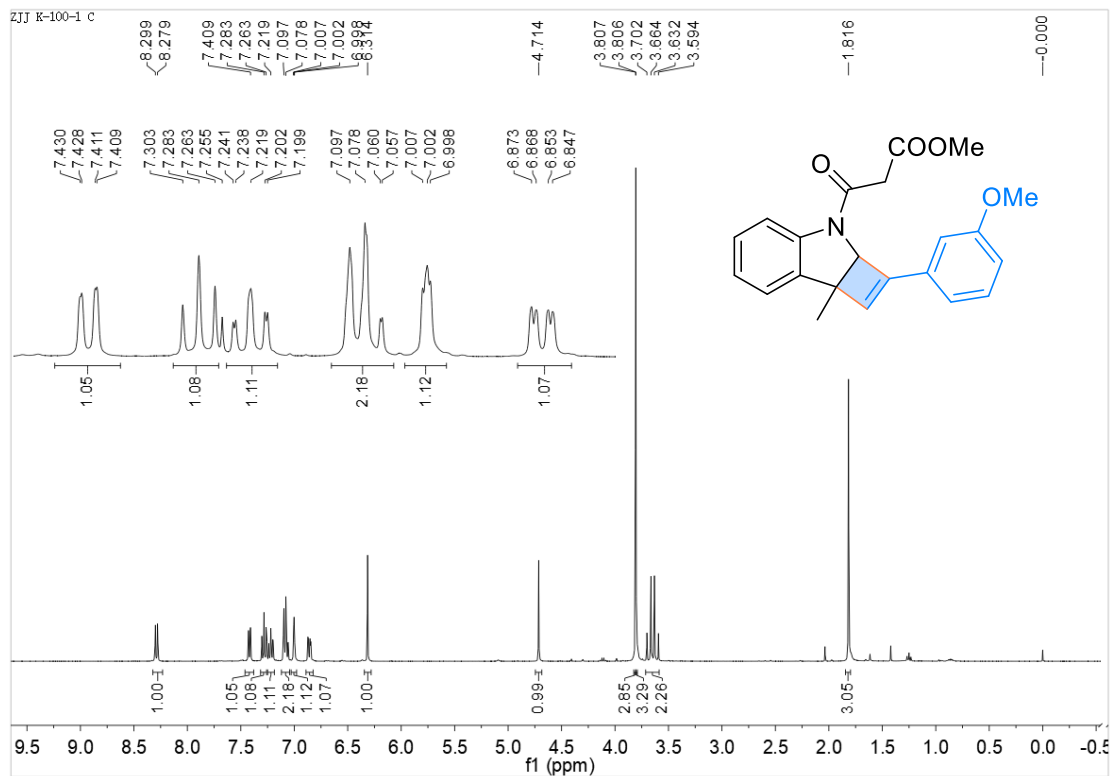

### 3e2 <sup>13</sup>C NMR

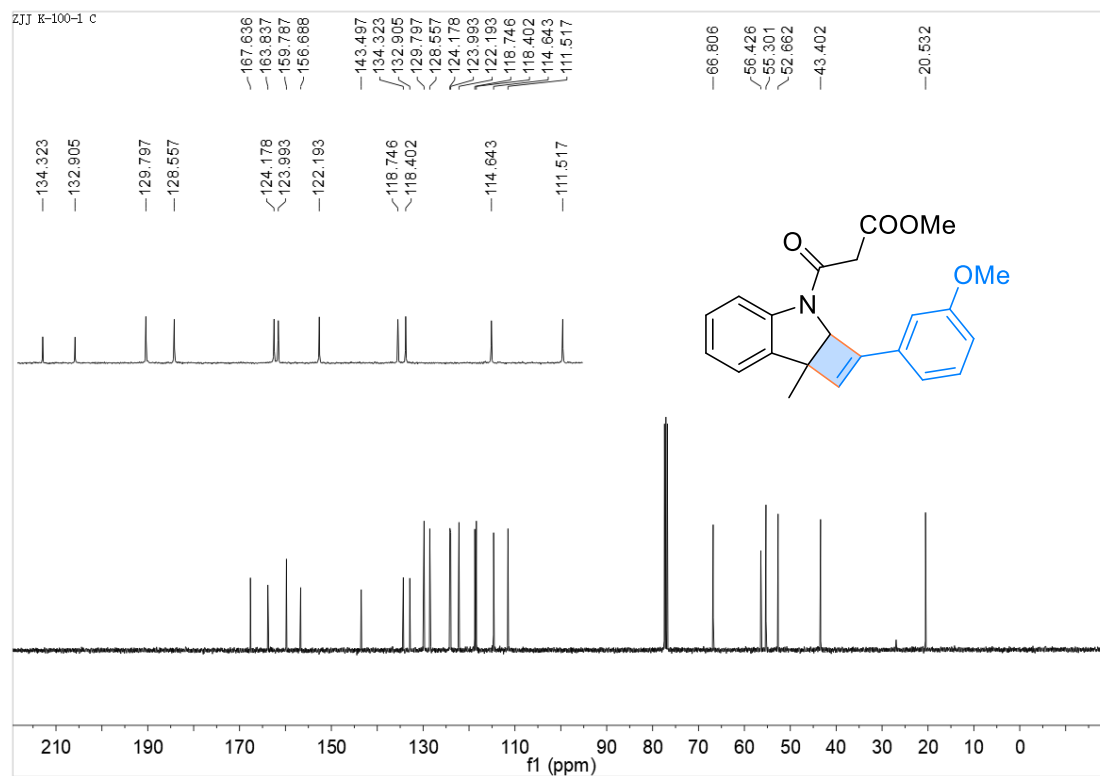

### 3e2 DEPT 90 and DEPT 135

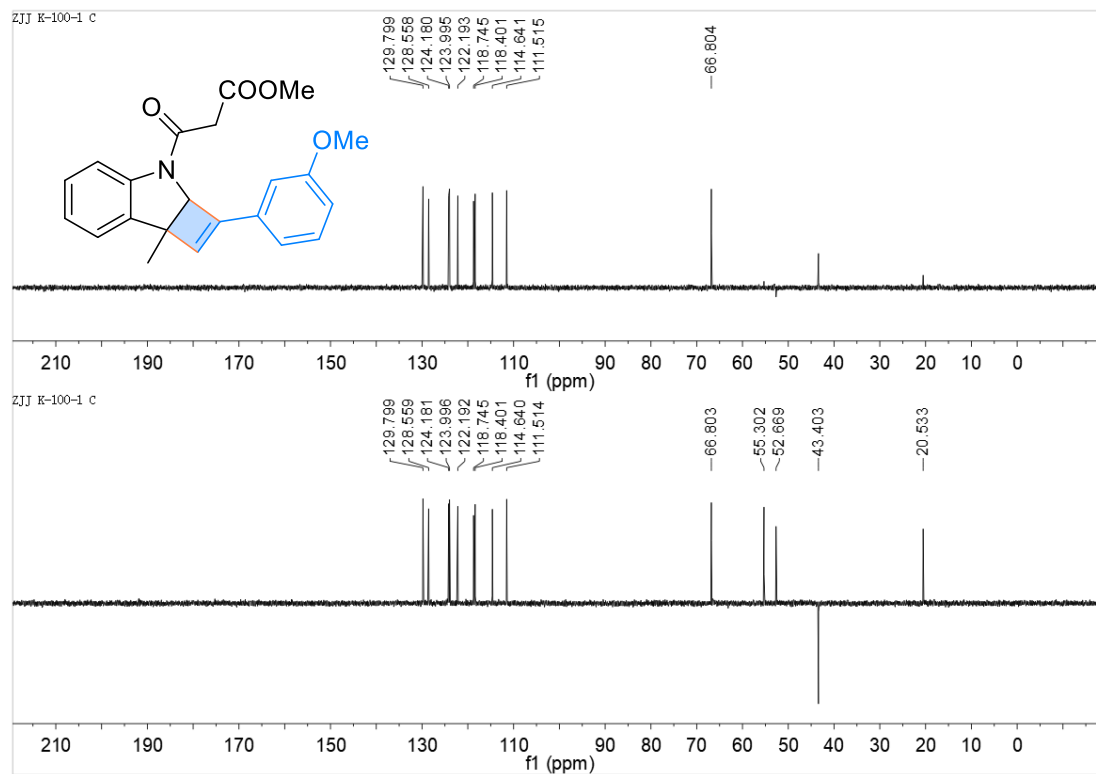

### 3f <sup>1</sup>H NMR

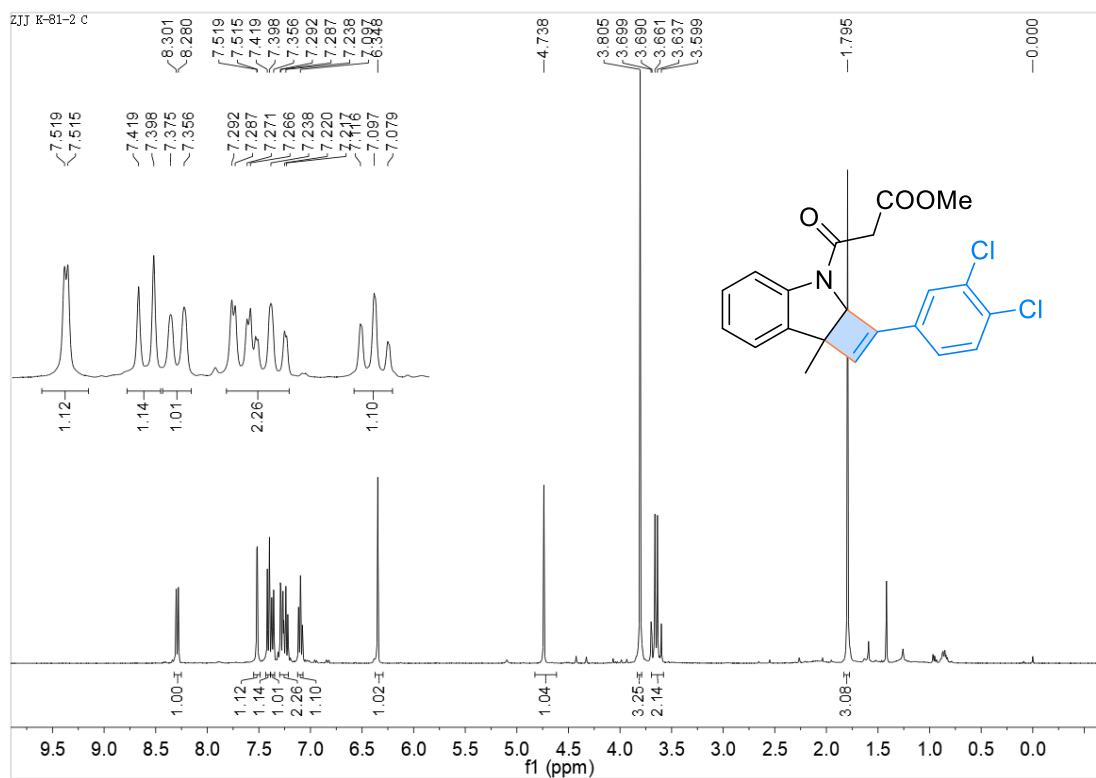

### 3f <sup>13</sup>C NMR

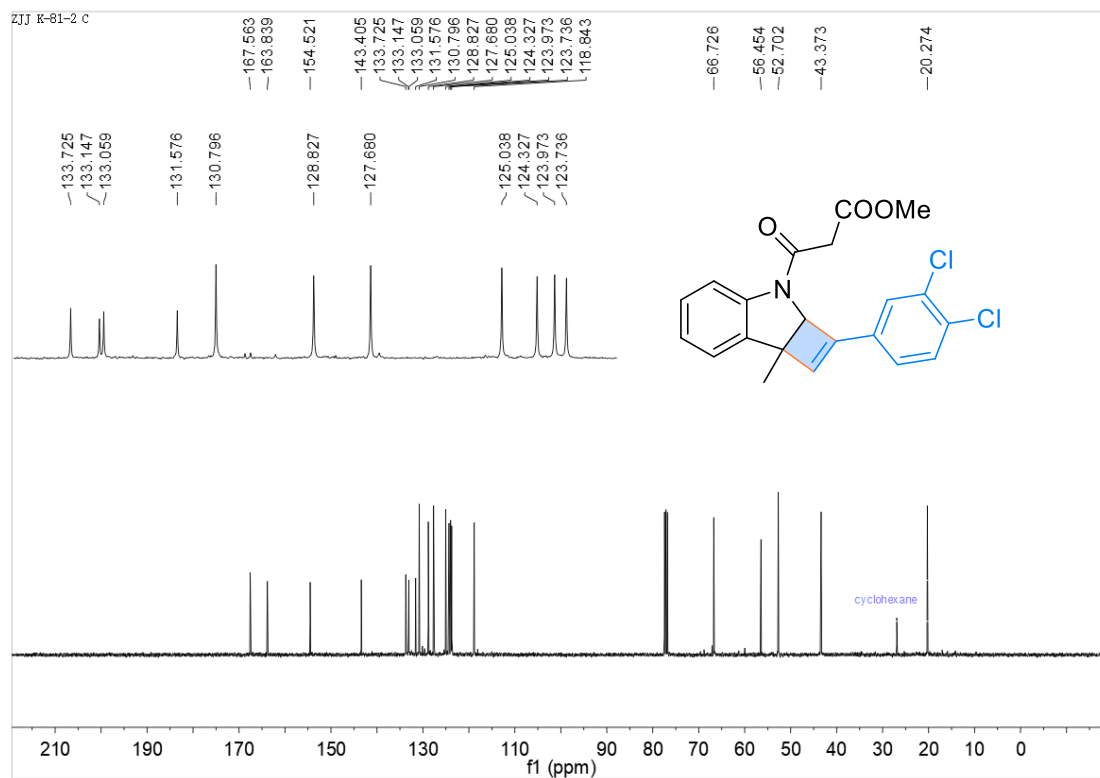

### 3f DEPT 90 and DEPT 135

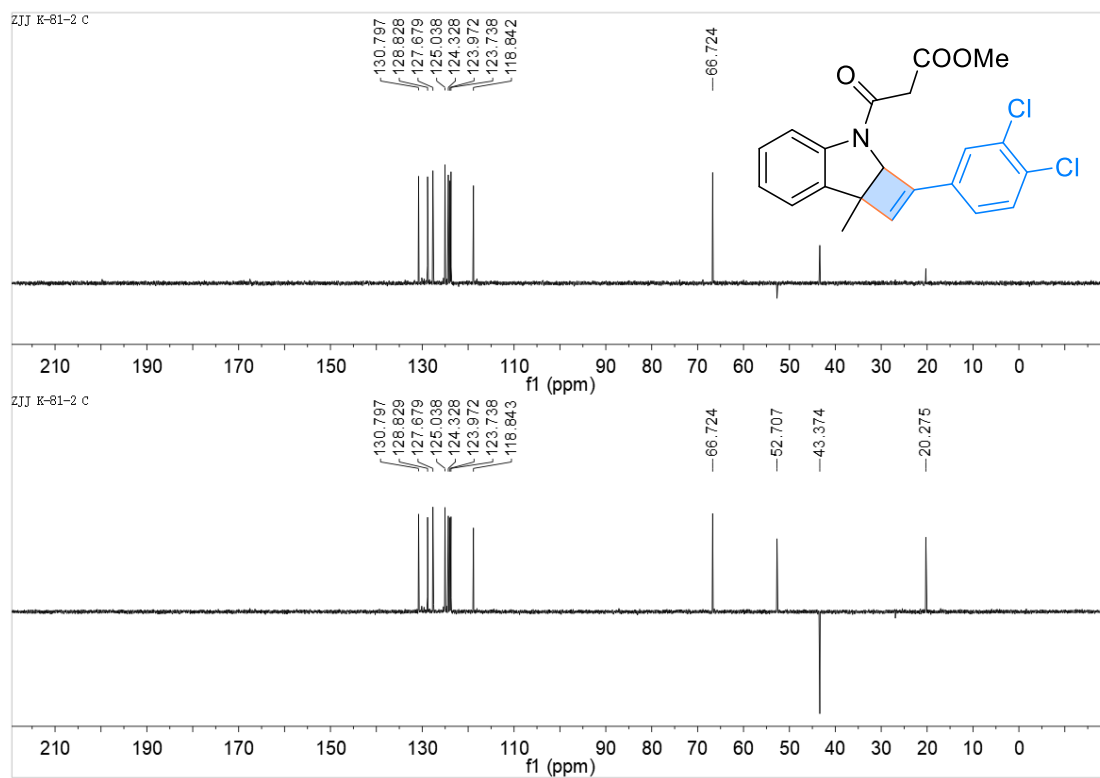

### 3g <sup>1</sup>H NMR

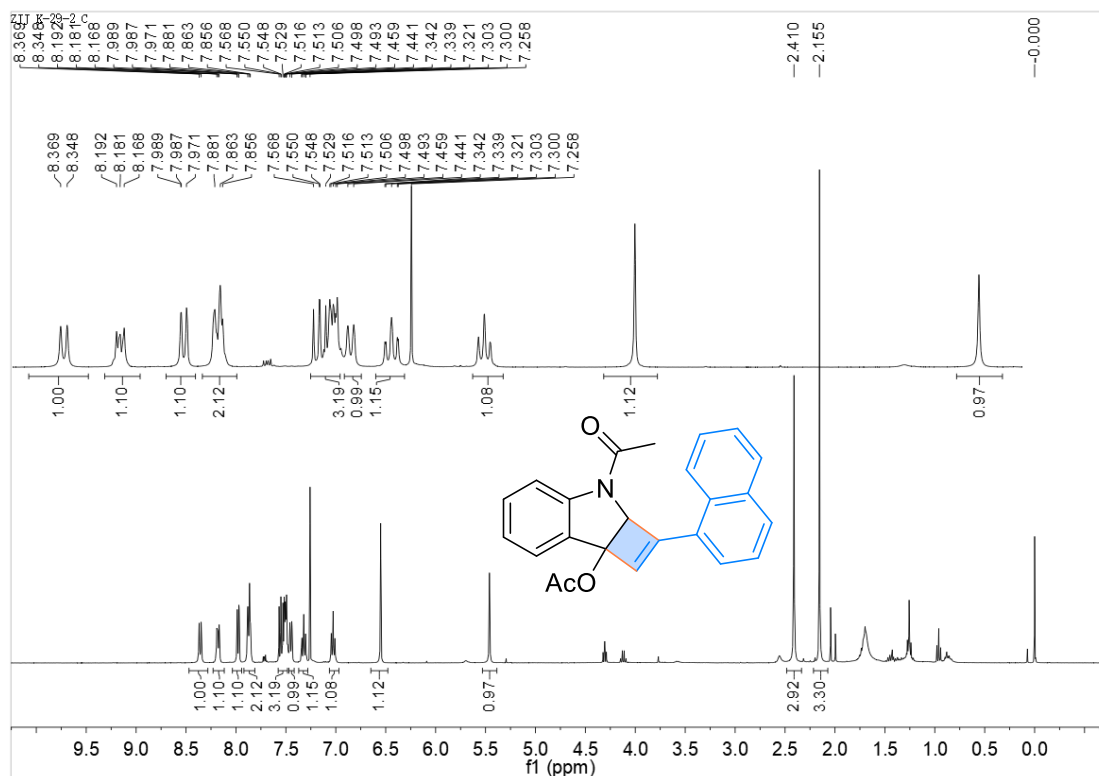

### 3g <sup>13</sup>C NMR

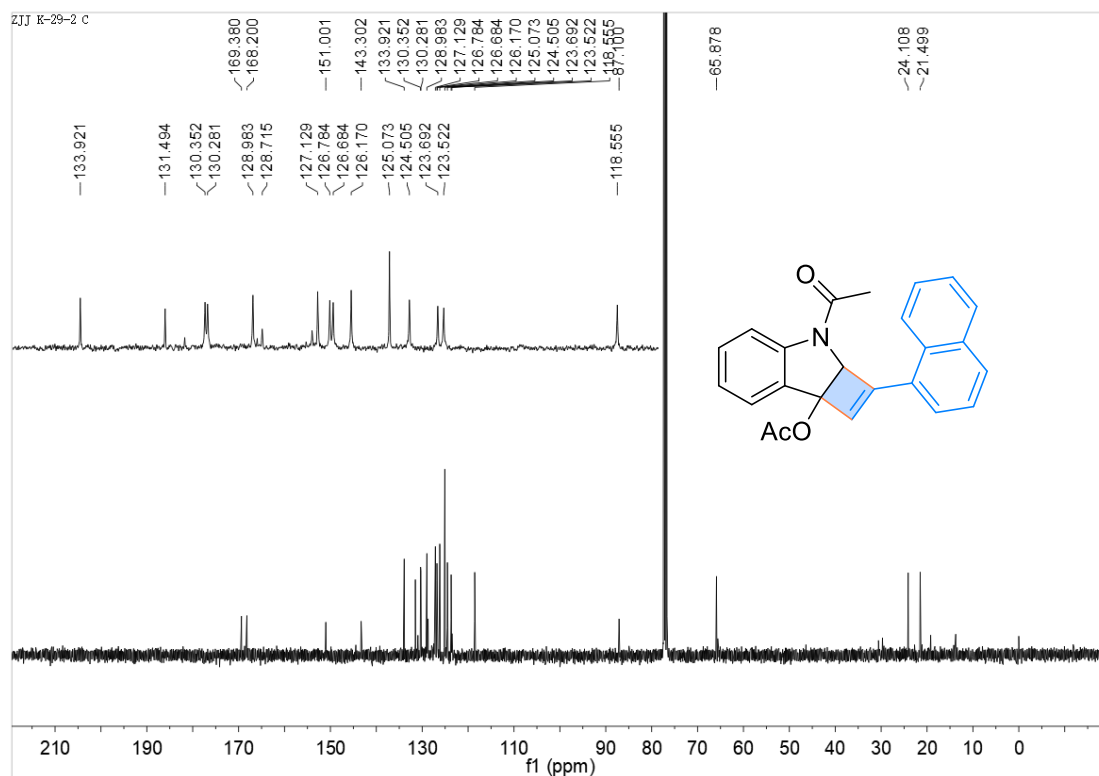

### 3g DEPT 90 and DEPT 135

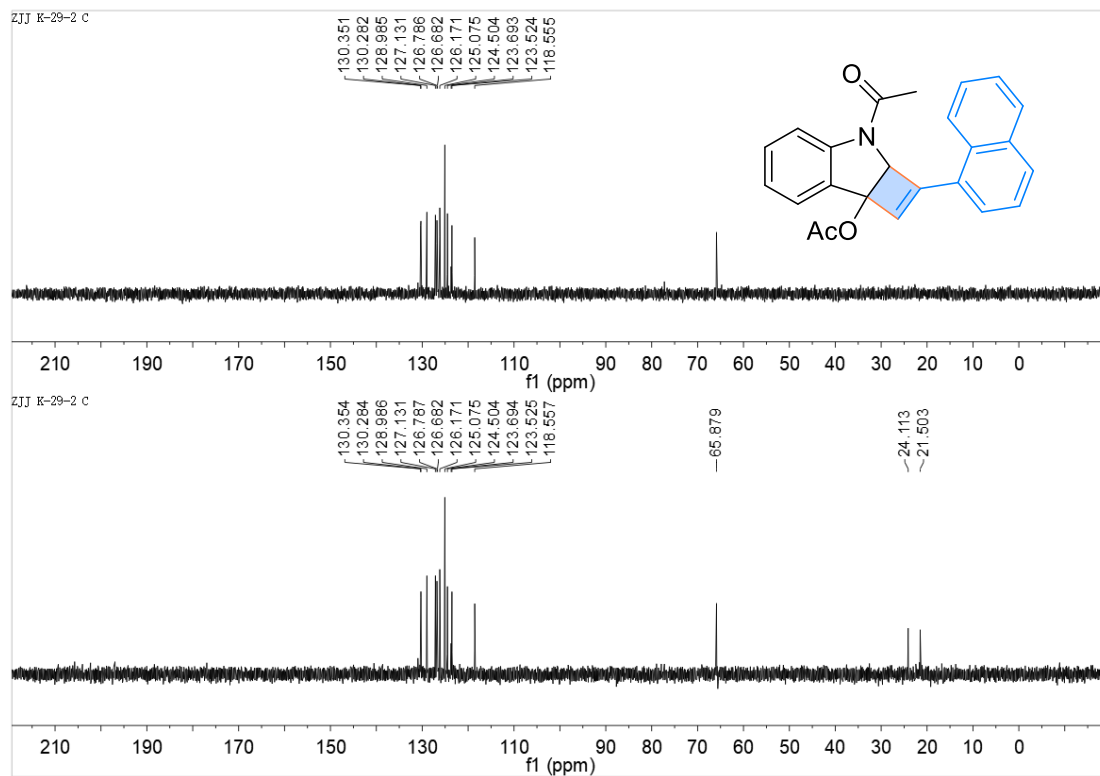

### 3h <sup>1</sup>H NMR

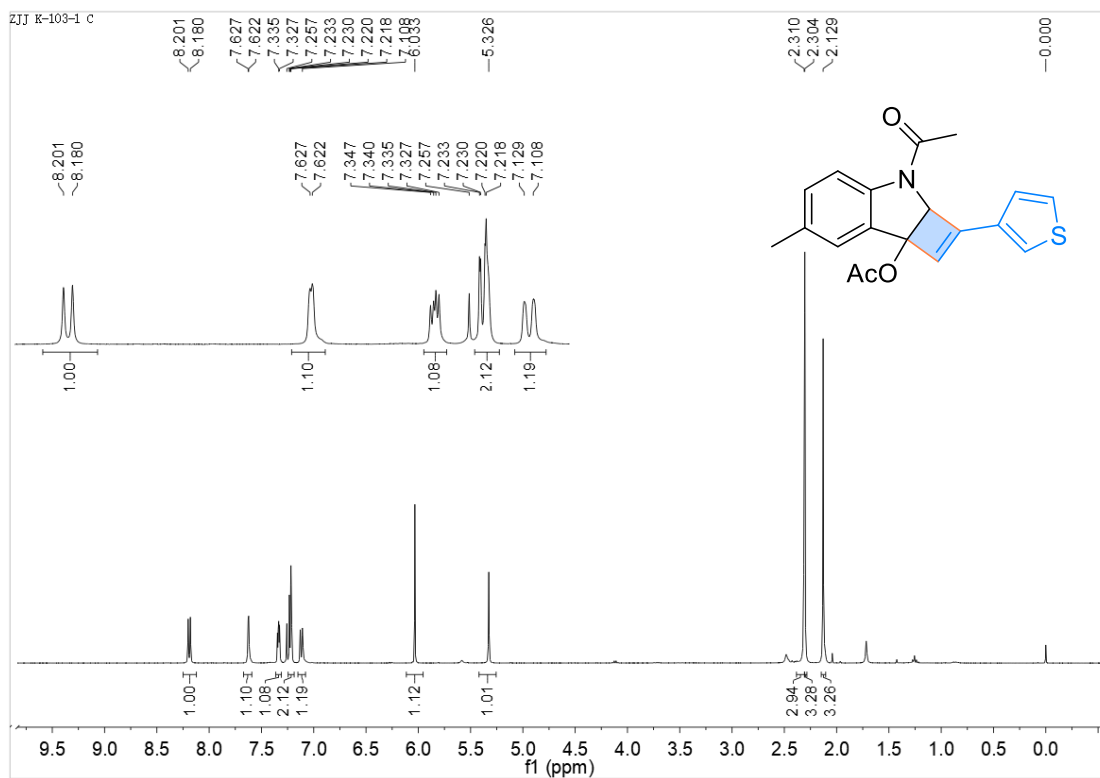



### 3h <sup>13</sup>C NMR

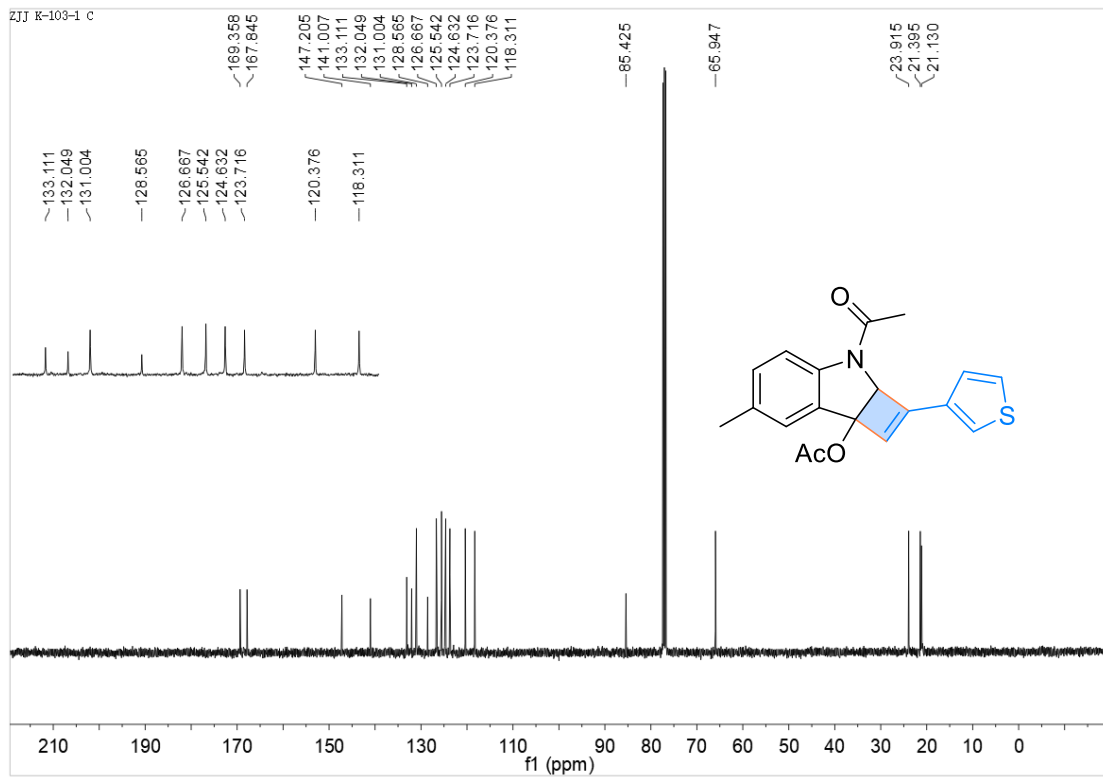

### 3h DEPT 90 and DEPT 135

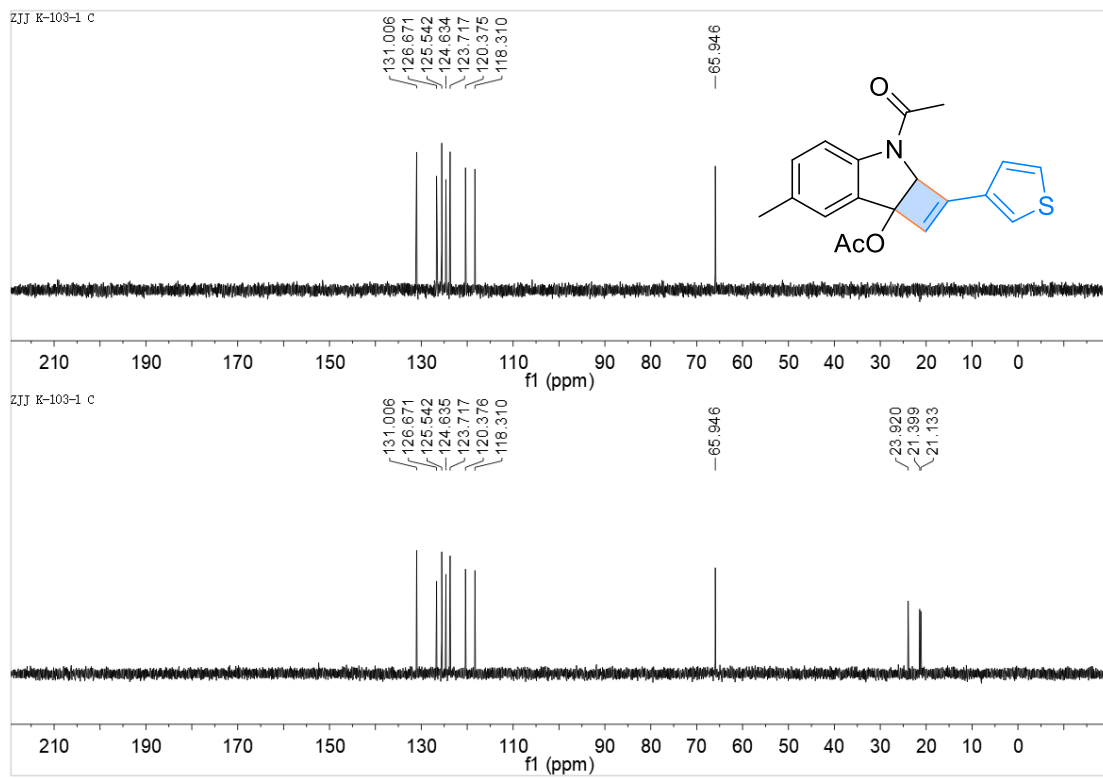

### 3i <sup>1</sup>H NMR

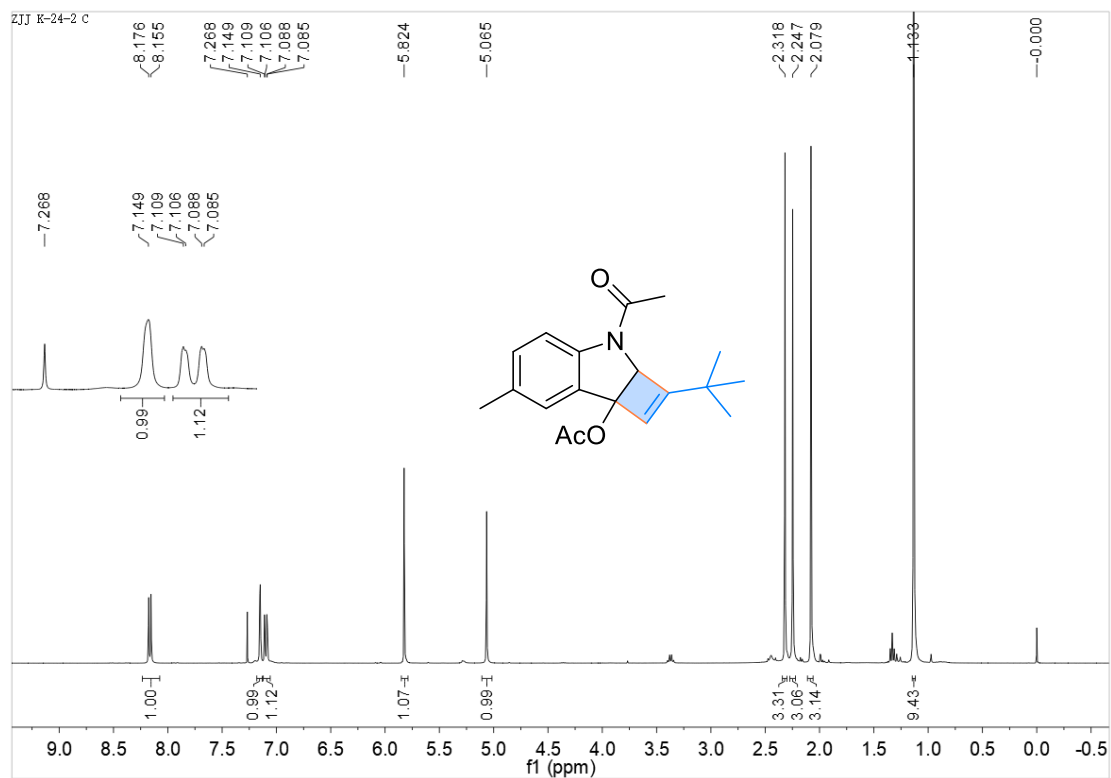

### 3i <sup>13</sup>C NMR

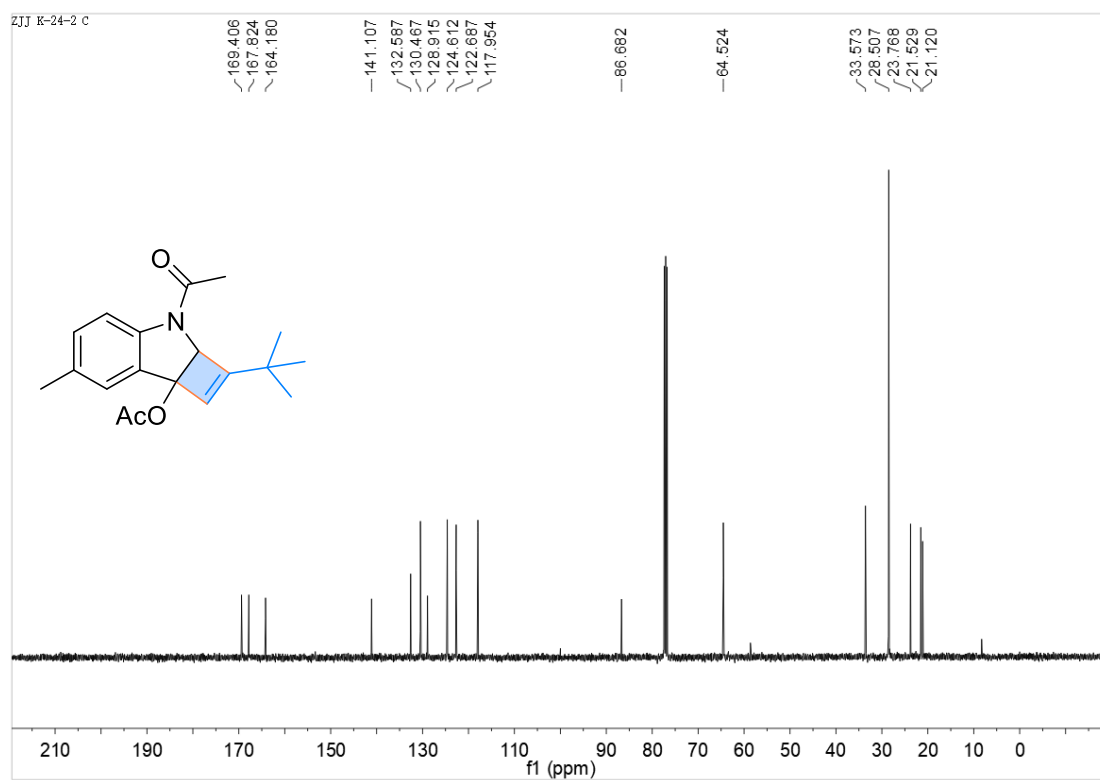

### 3i DEPT 90 and DEPT 135

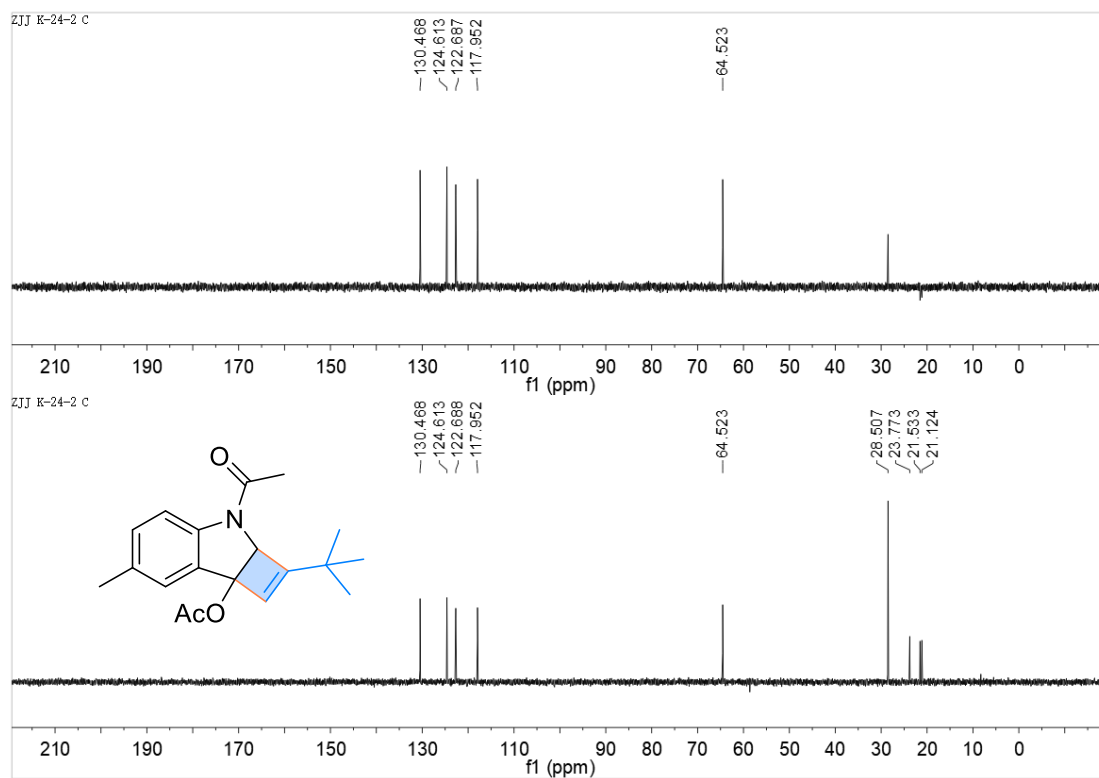

### 3j <sup>1</sup>H NMR

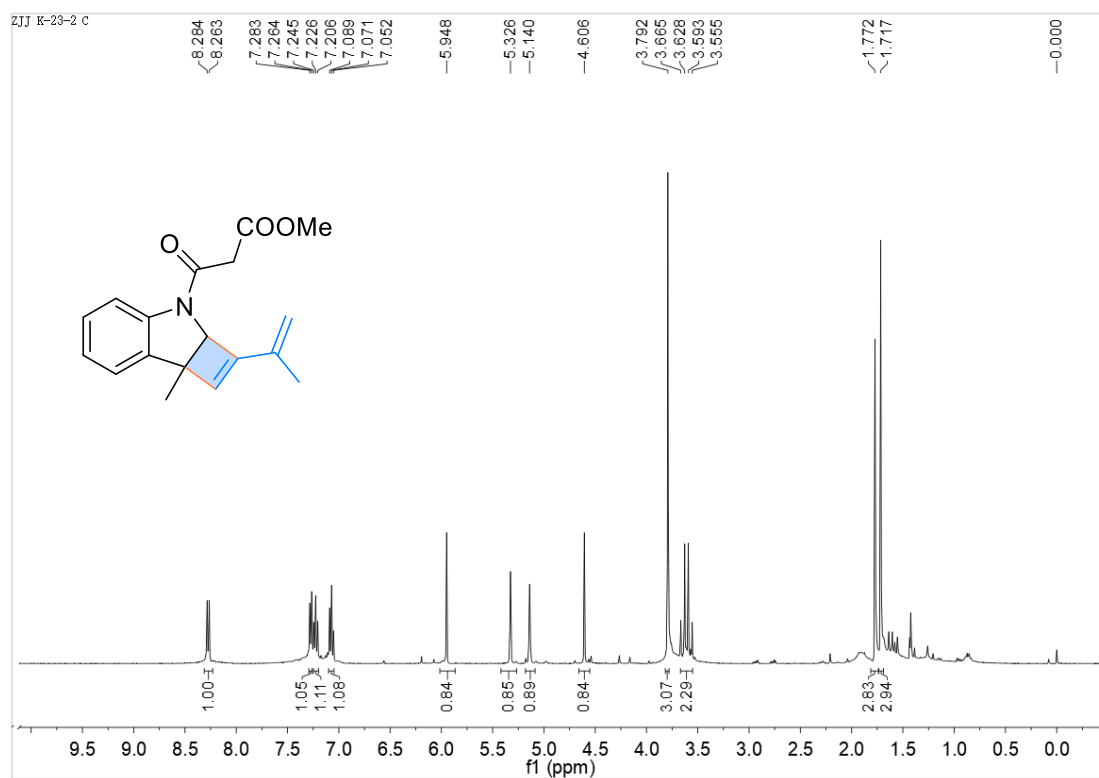

### 3j <sup>13</sup>C NMR

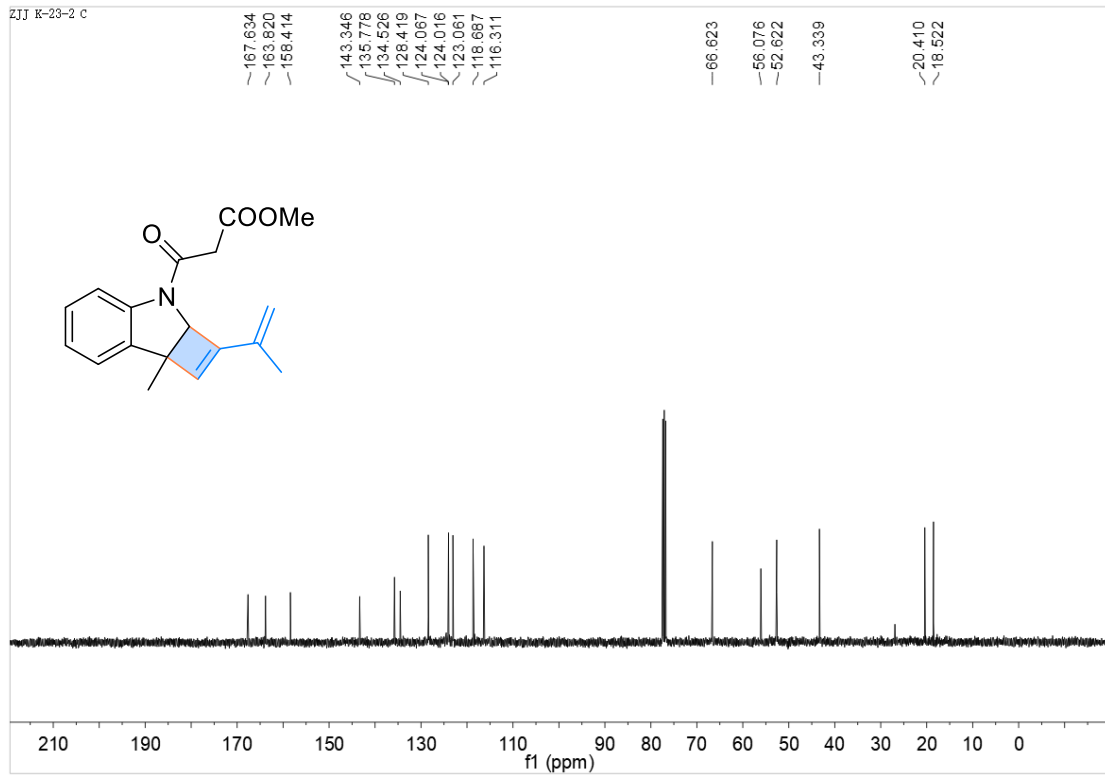

### 3j DEPT 90 and DEPT 135

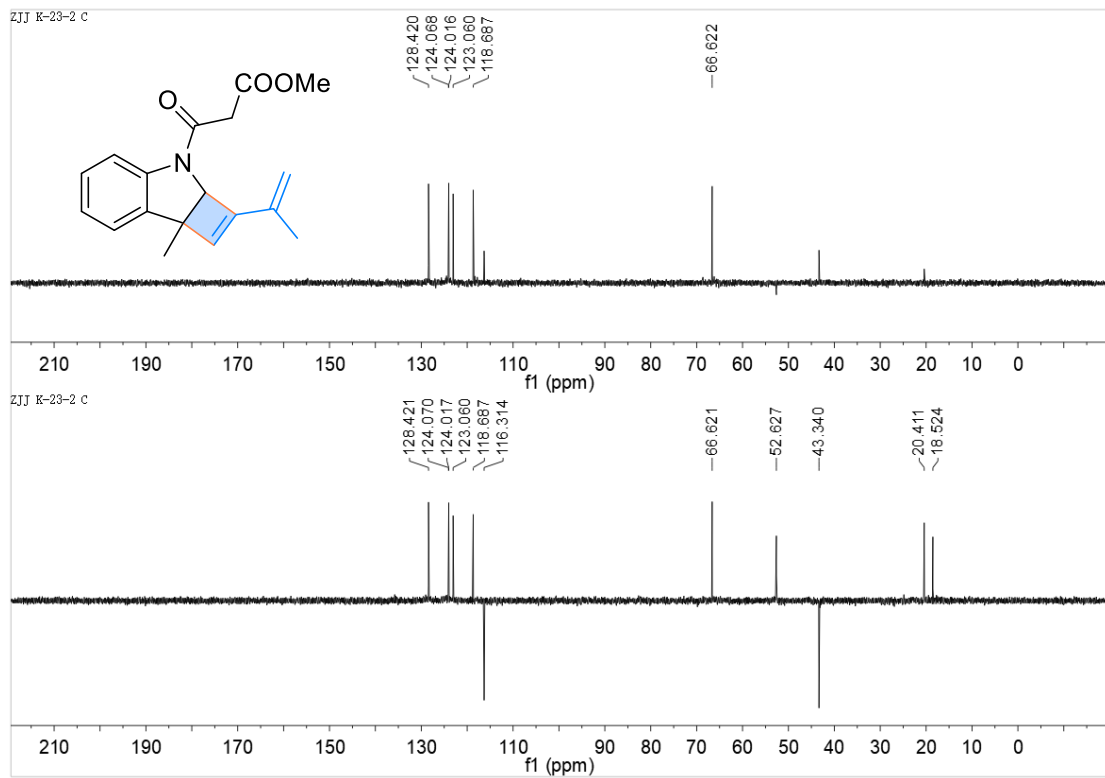

### 3k <sup>1</sup>H NMR

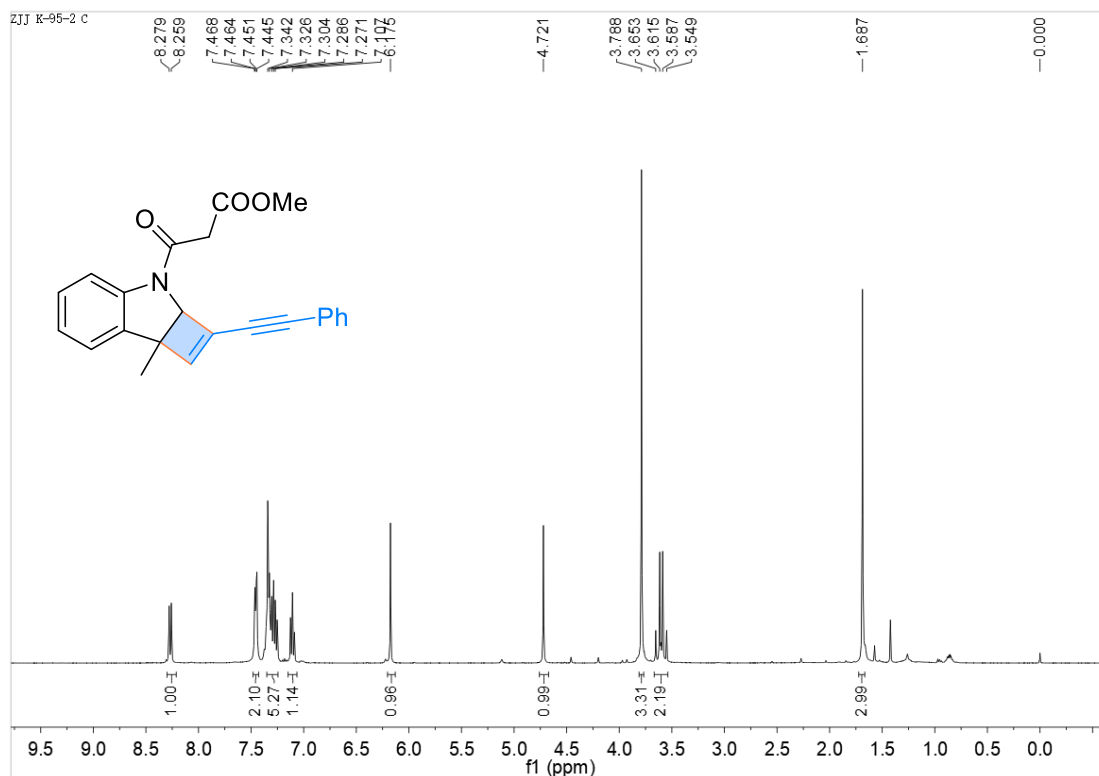

### 3k <sup>13</sup>C NMR

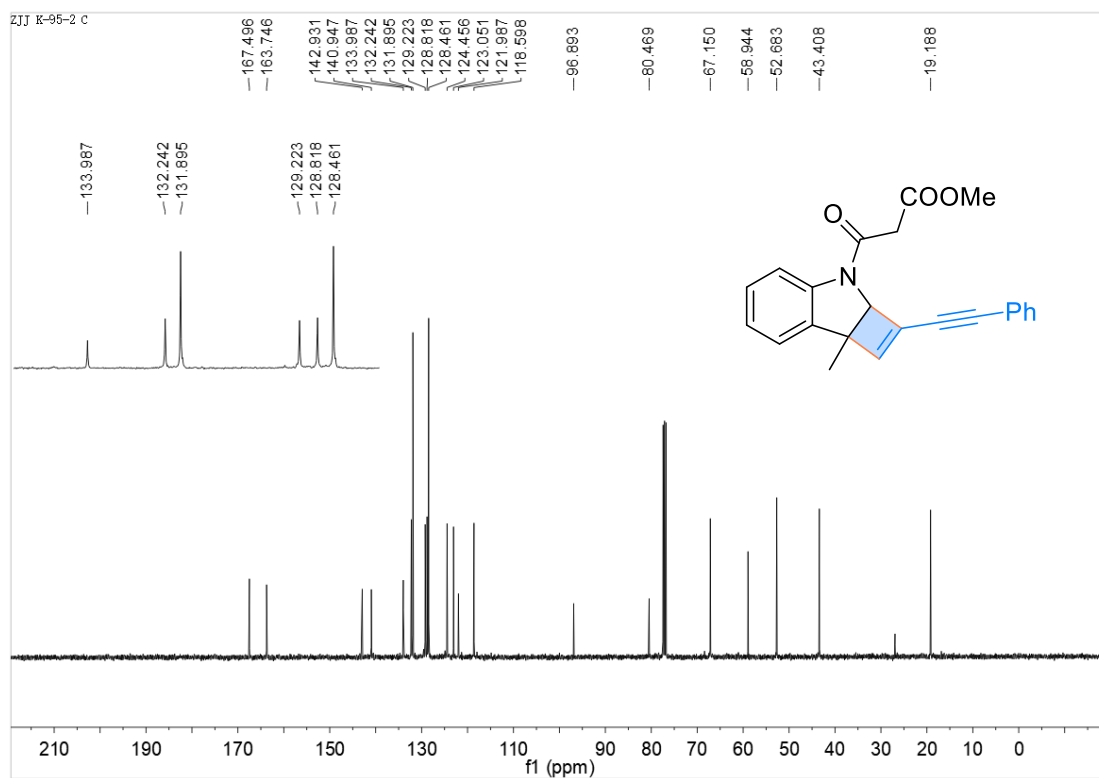

### 3k DEPT 90 and DEPT 135

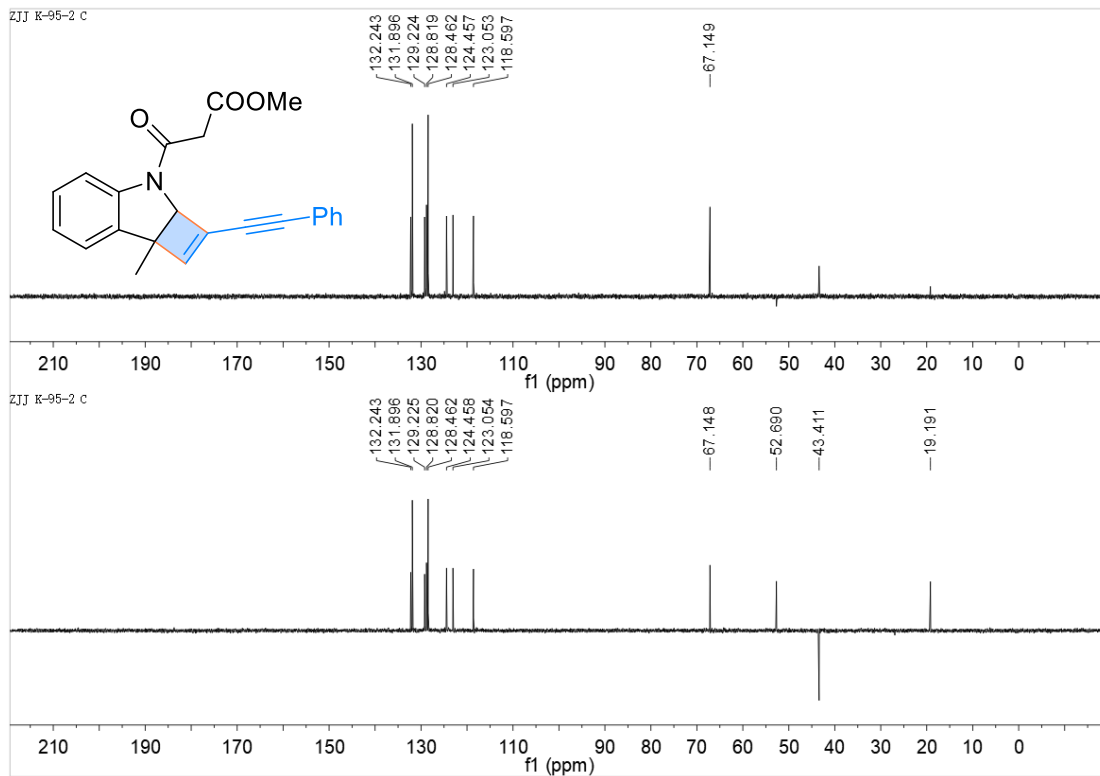

### 311 <sup>1</sup>H NMR

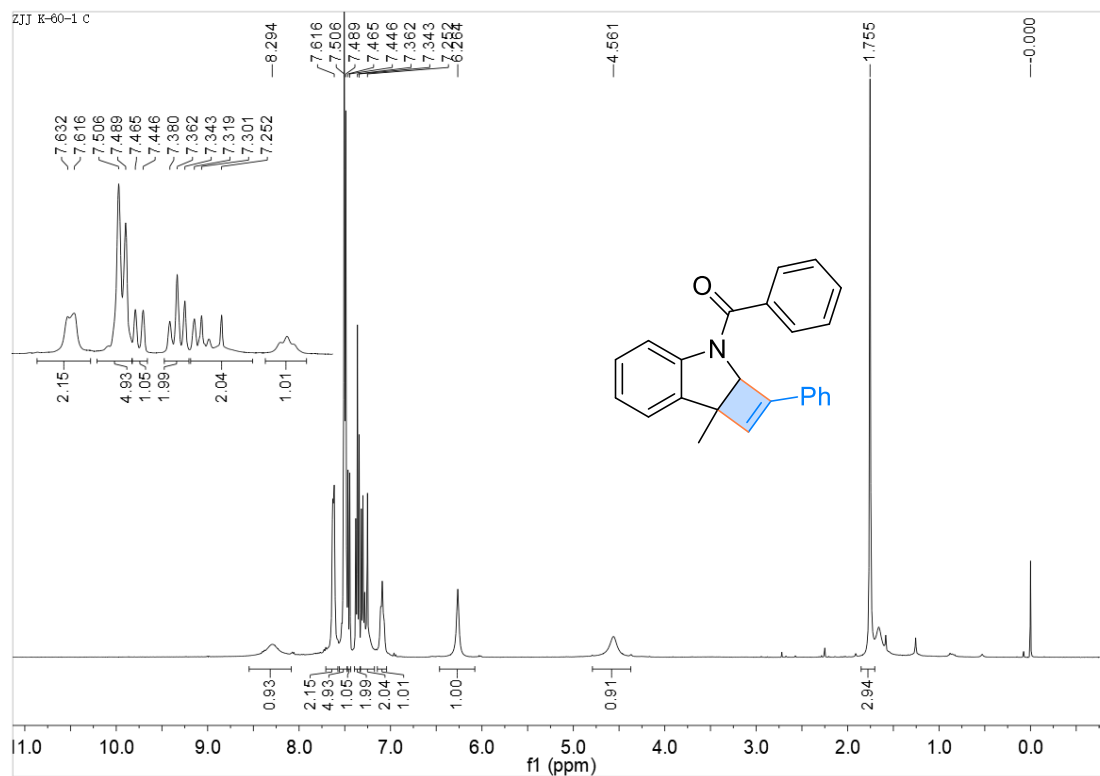

### 311 <sup>13</sup>C NMR

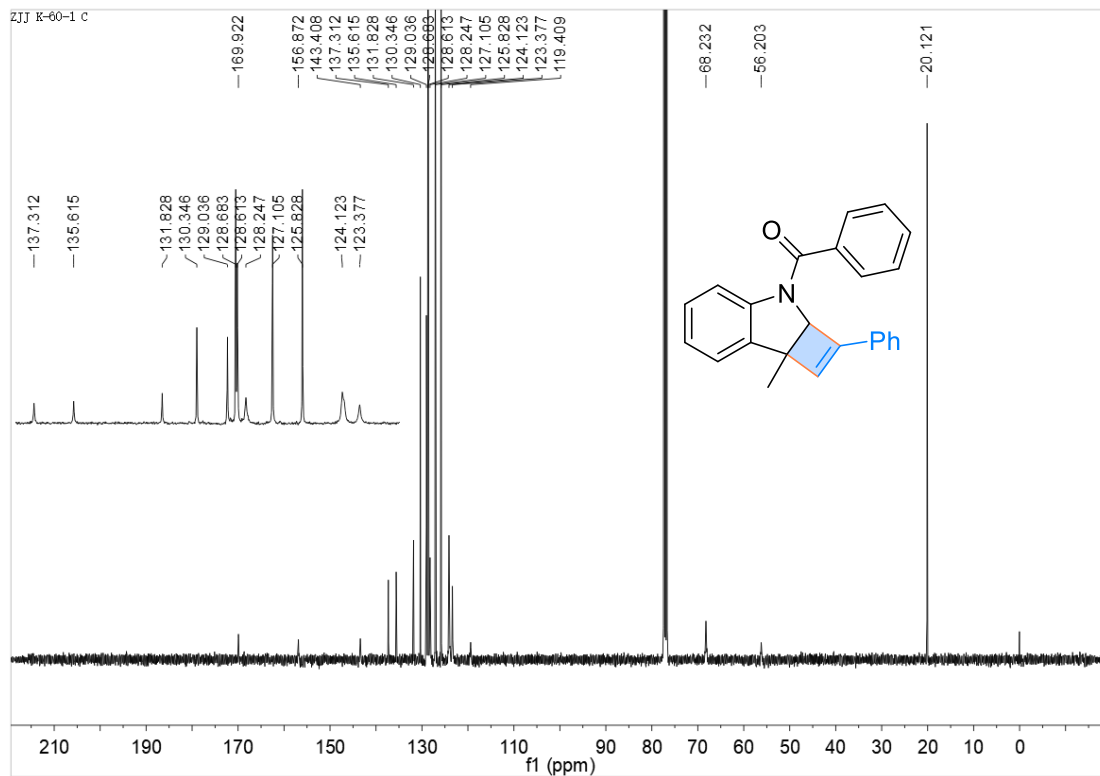

### 311 DEPT 90 and DEPT 135

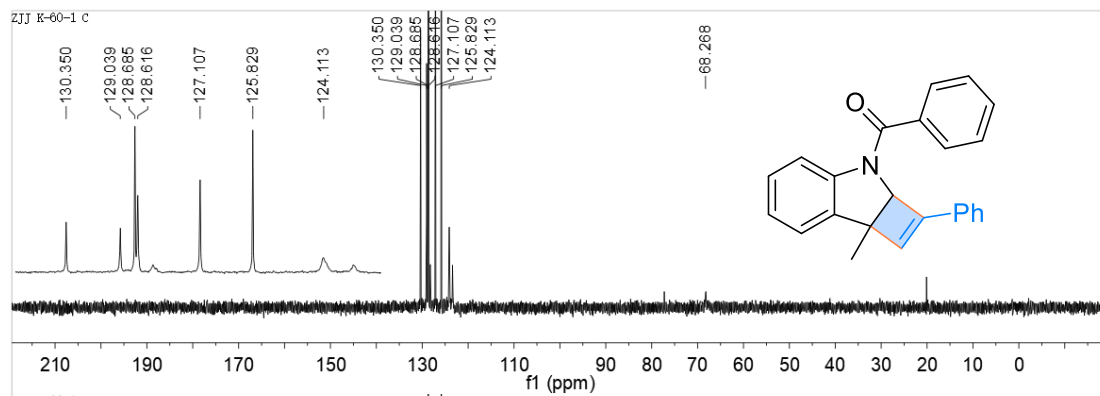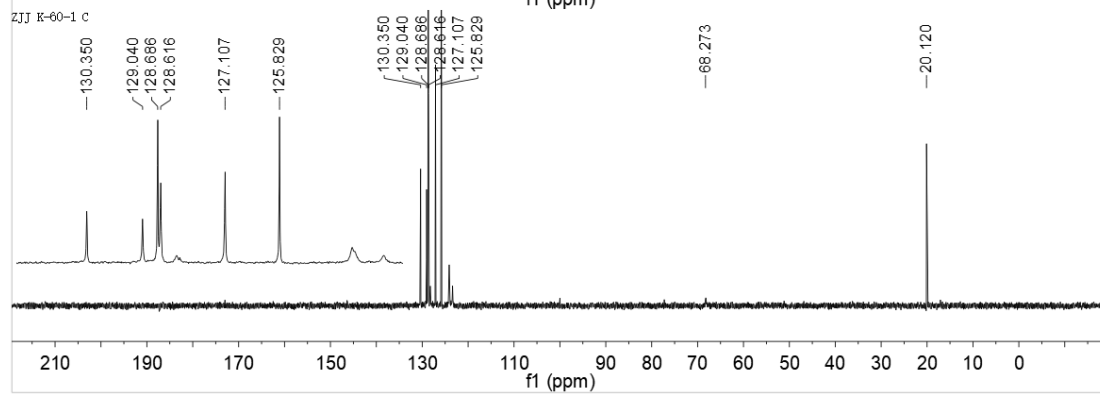

### 312 <sup>1</sup>H NMR

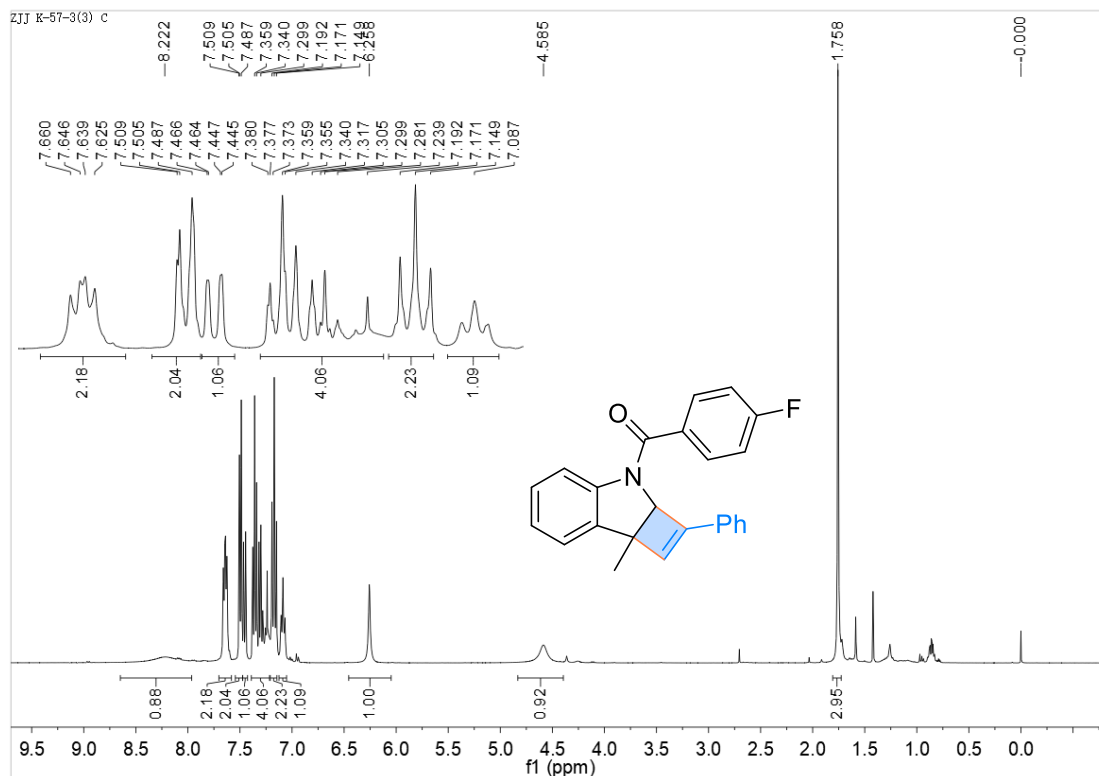

### 312 <sup>13</sup>C NMR

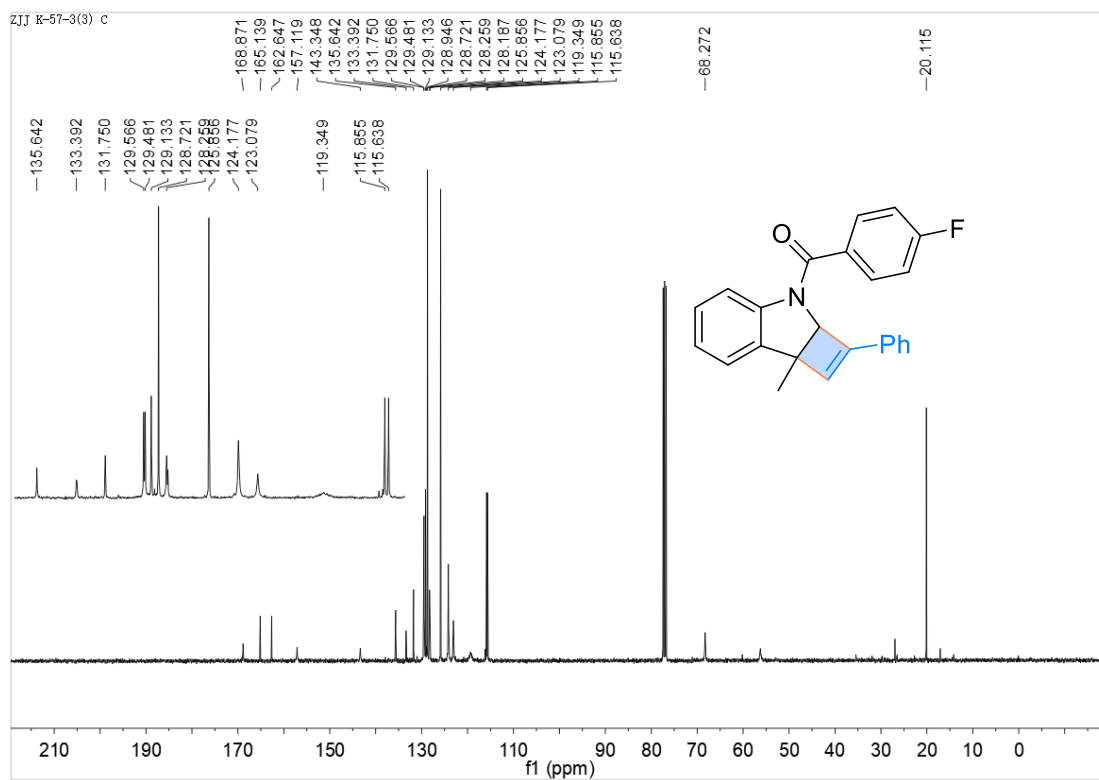



### 312 DEPT 90 and DEPT 135

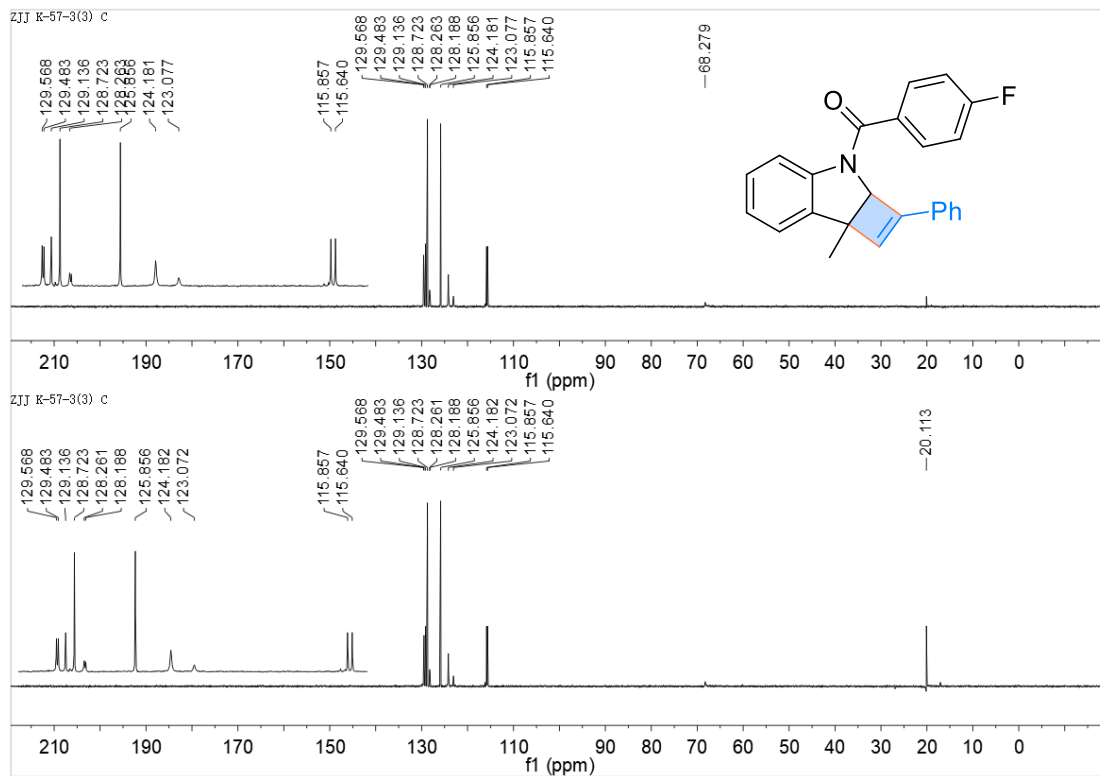

### 312 <sup>19</sup>F NMR

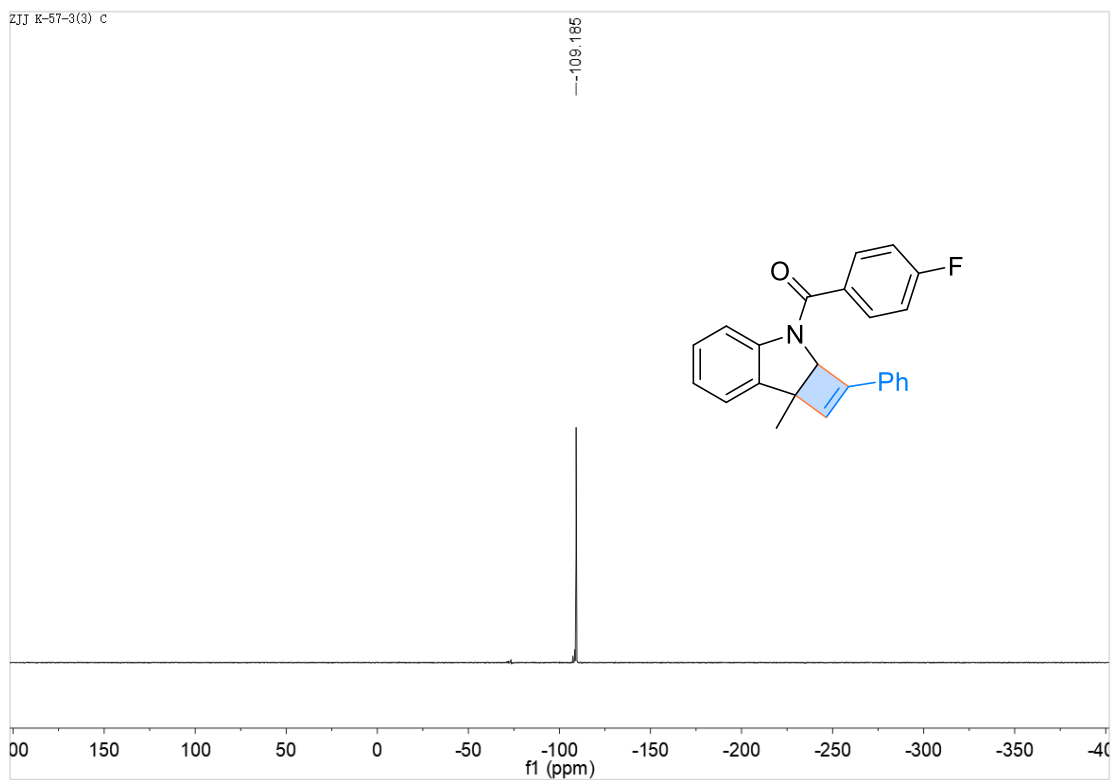

### 3m1 <sup>1</sup>H NMR

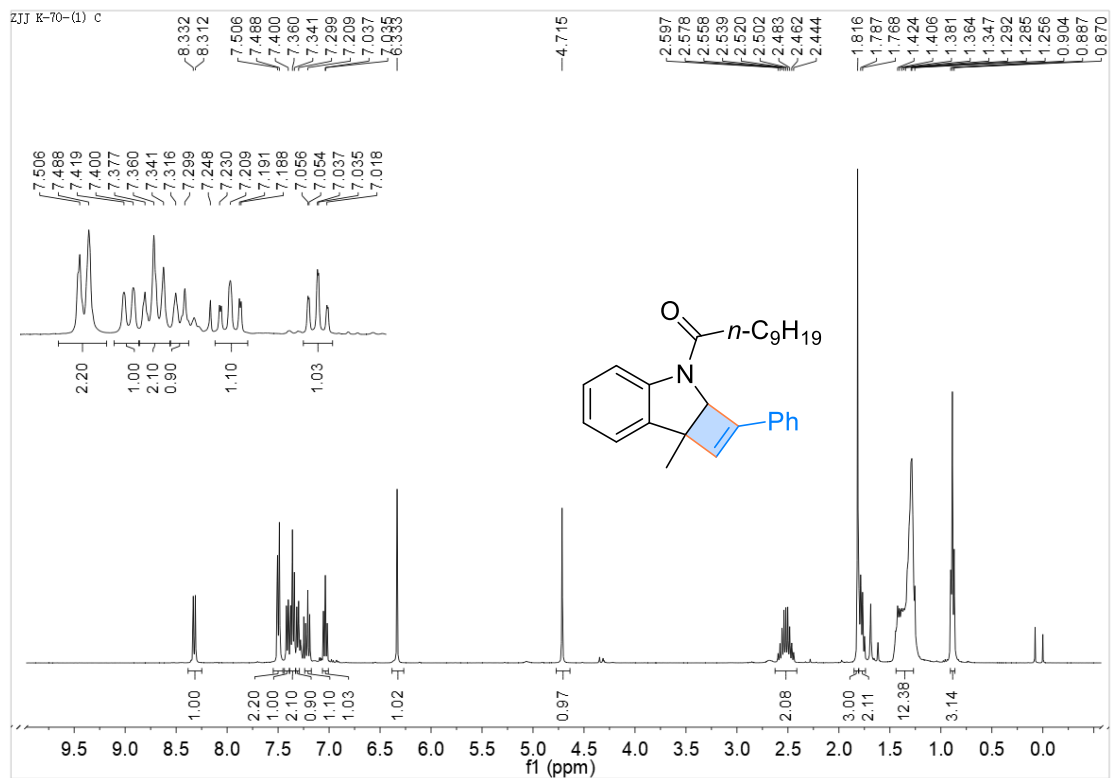

### 3m1 <sup>13</sup>C NMR

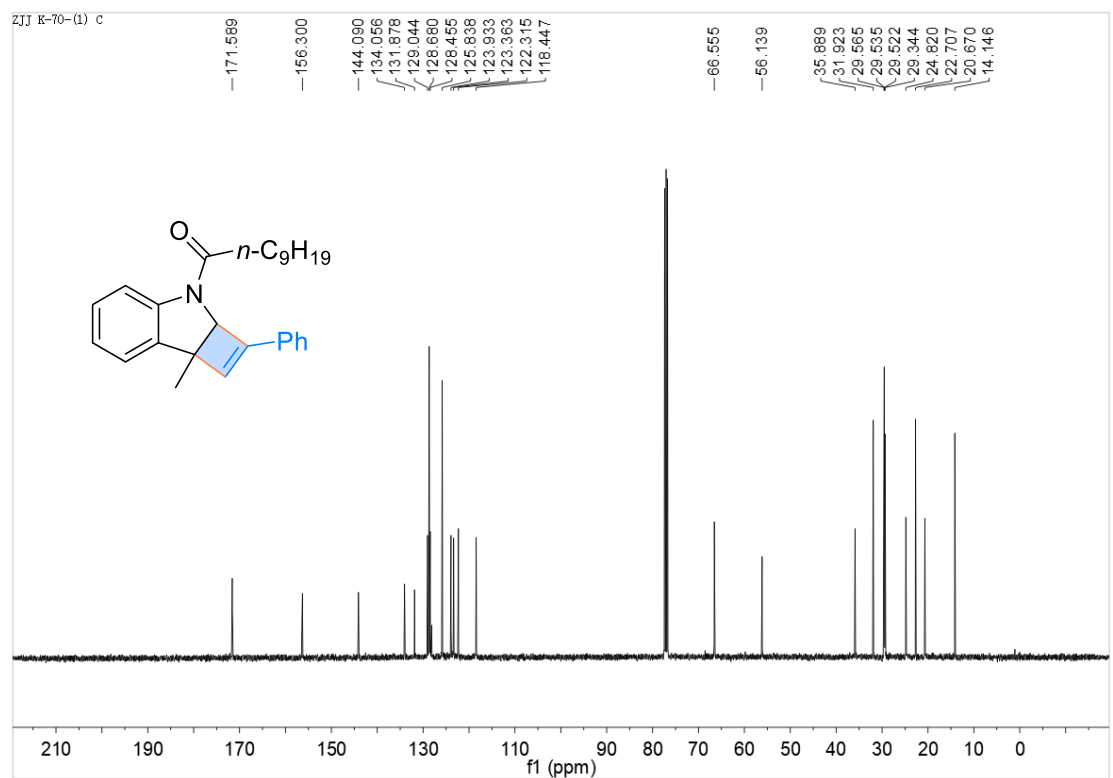

### 3m1 DEPT 90 and DEPT 135

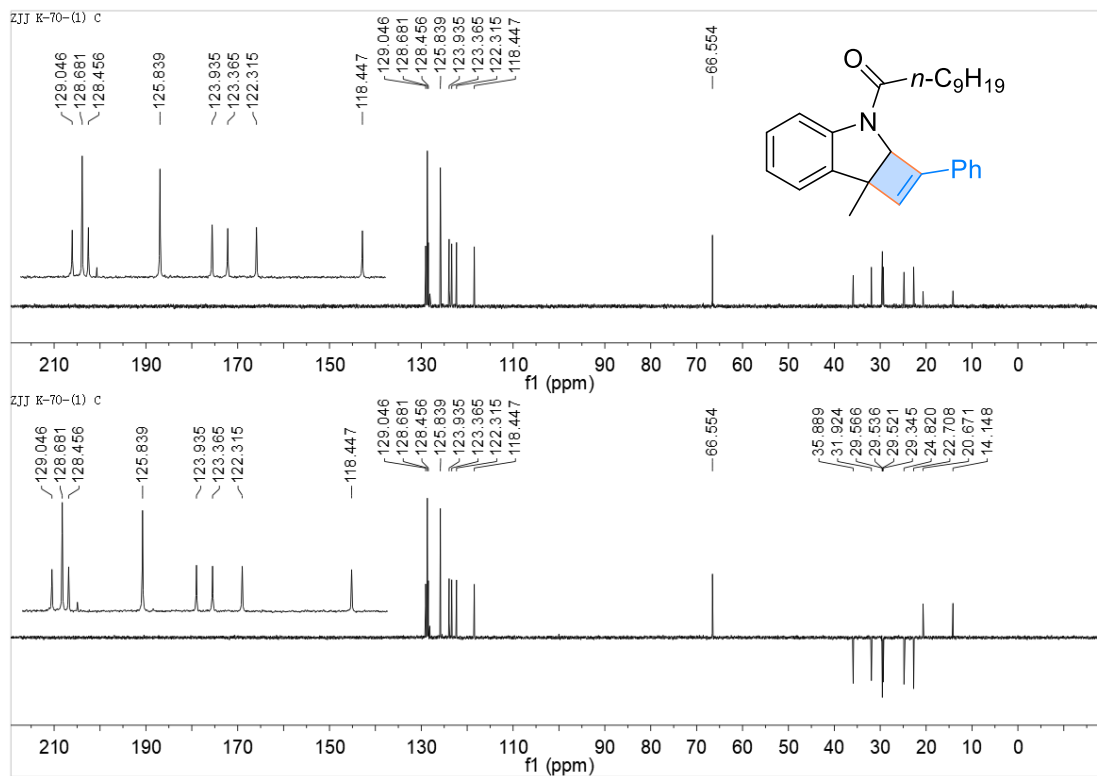

### 3m2 <sup>1</sup>H NMR

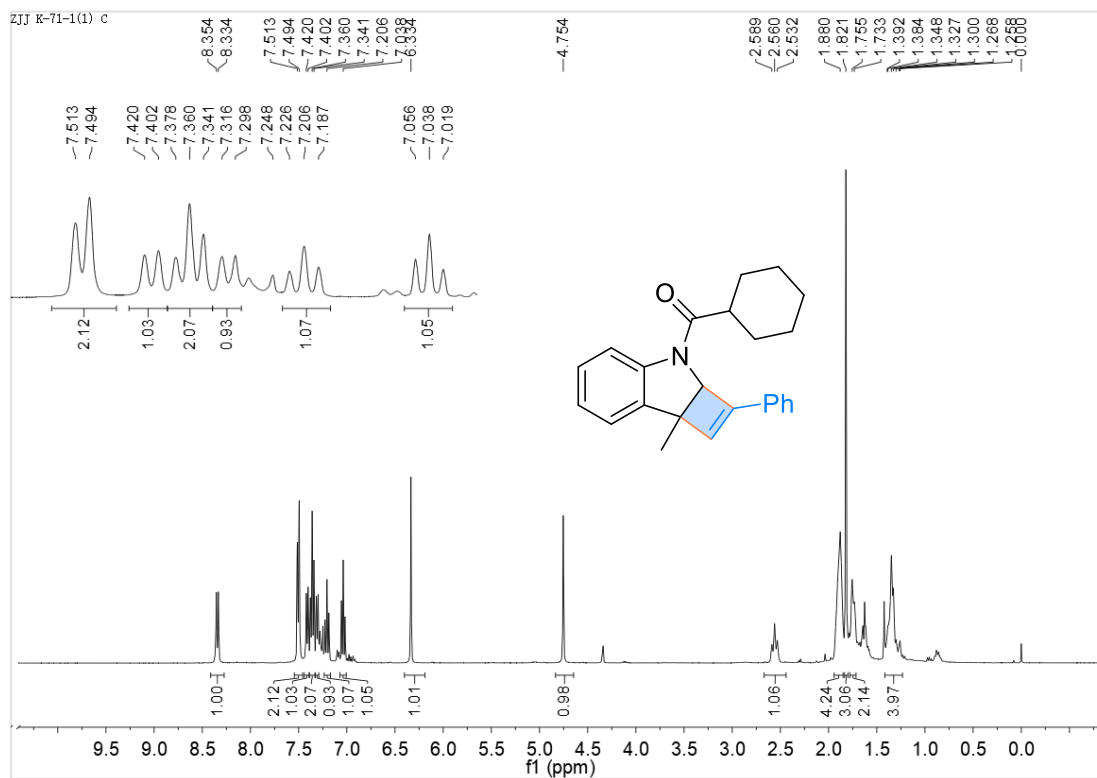

### 3m2 <sup>13</sup>C NMR

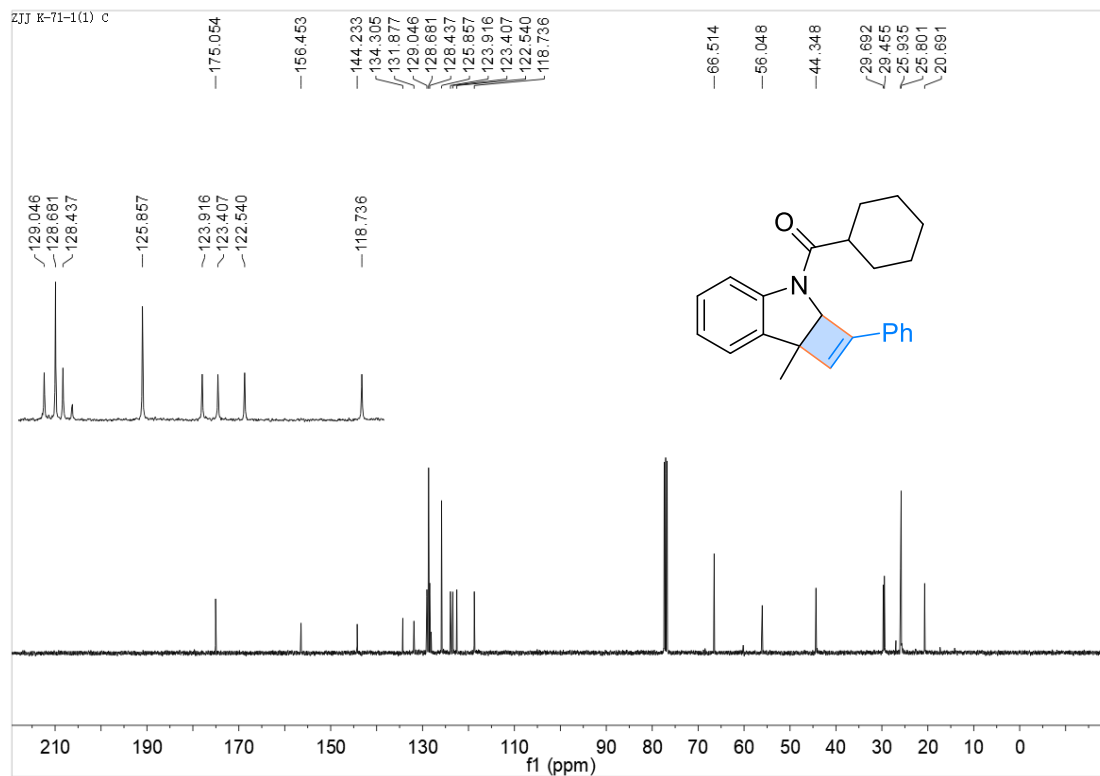

### 3m2 DEPT 90 and DEPT 135

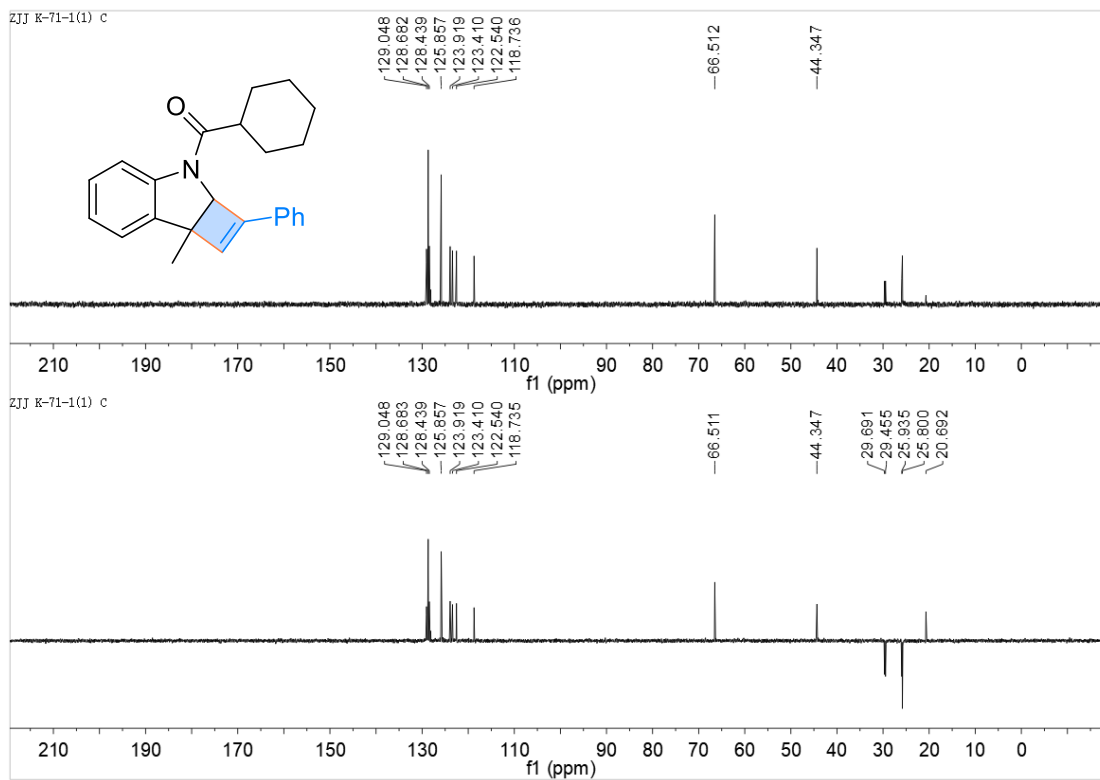

### 3n <sup>1</sup>H NMR

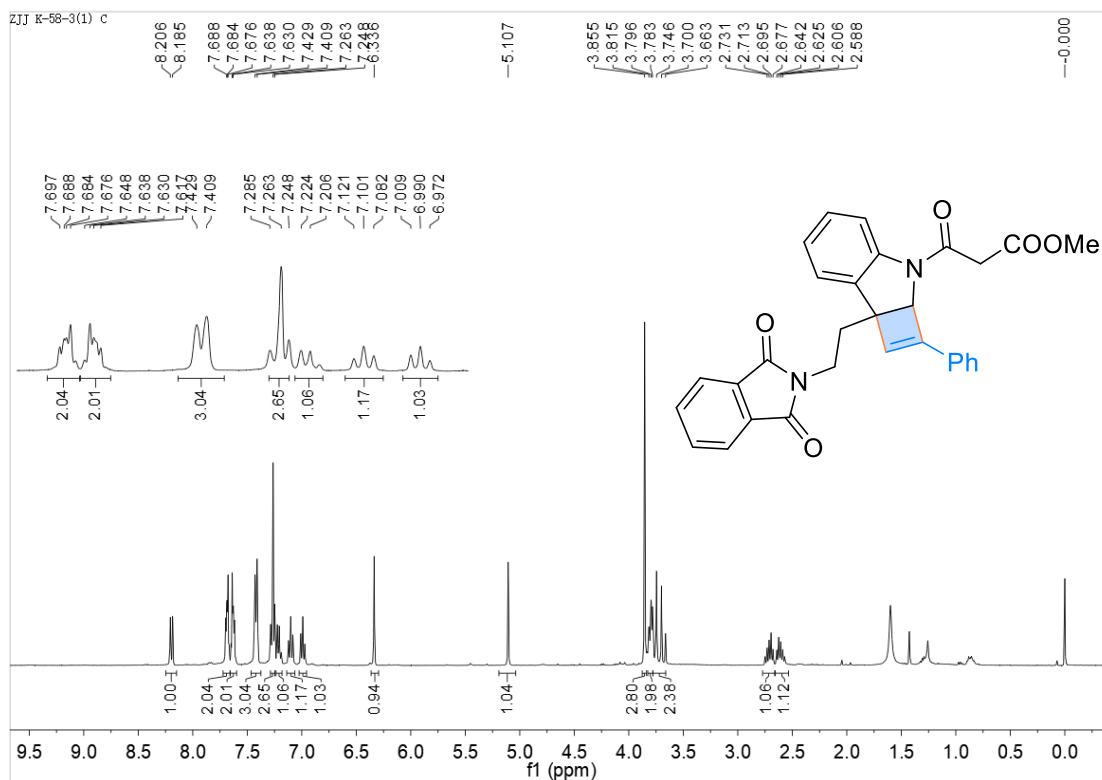

### 3n <sup>13</sup>C NMR

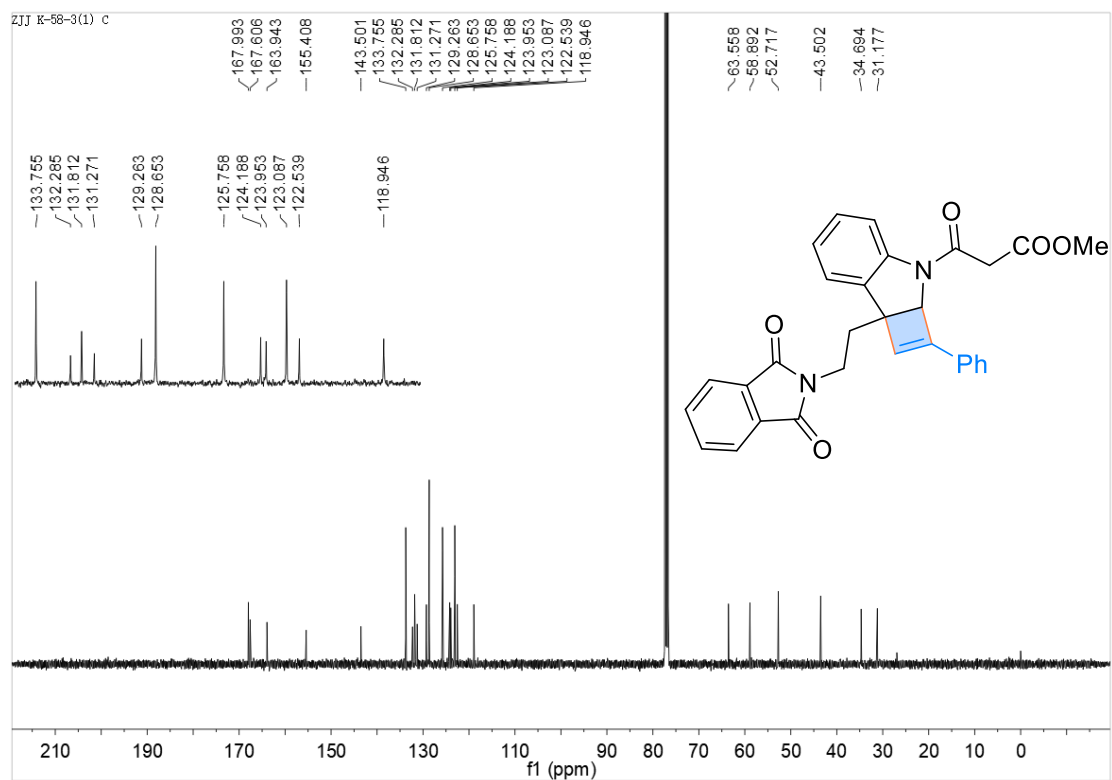

### 3n DEPT 90 and DEPT 135

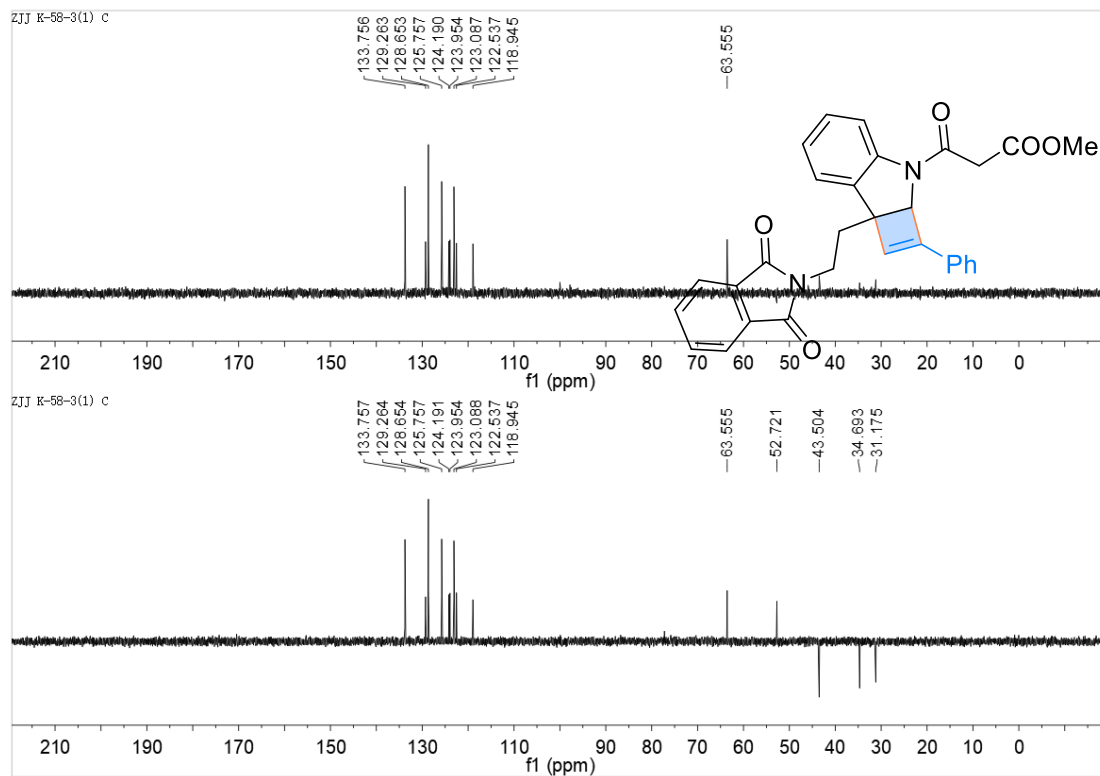

### 3o <sup>1</sup>H NMR

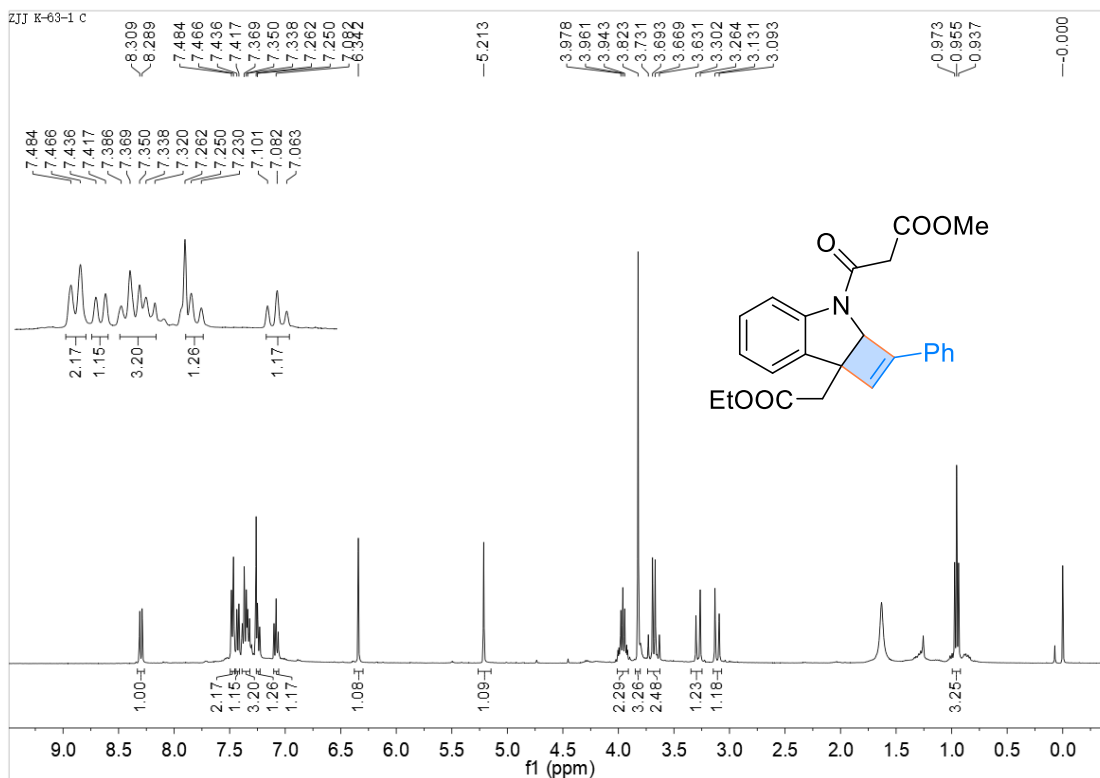

### 3o <sup>13</sup>C NMR

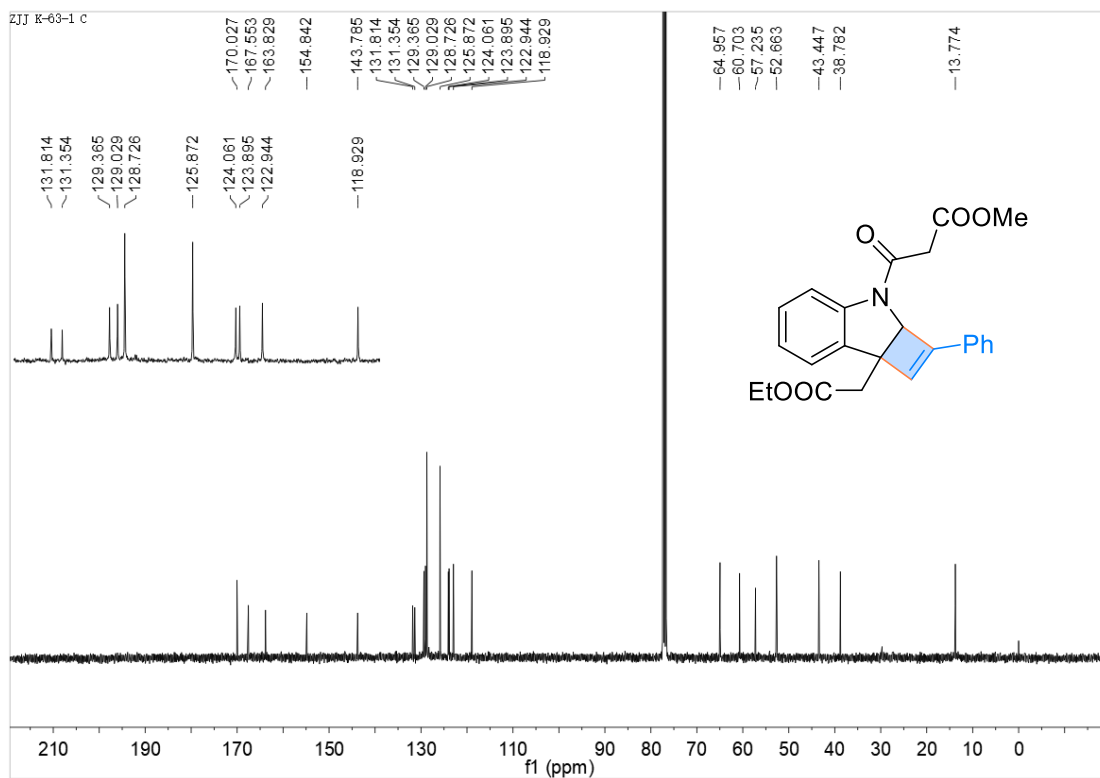

### 3o DEPT 90 and DEPT 135

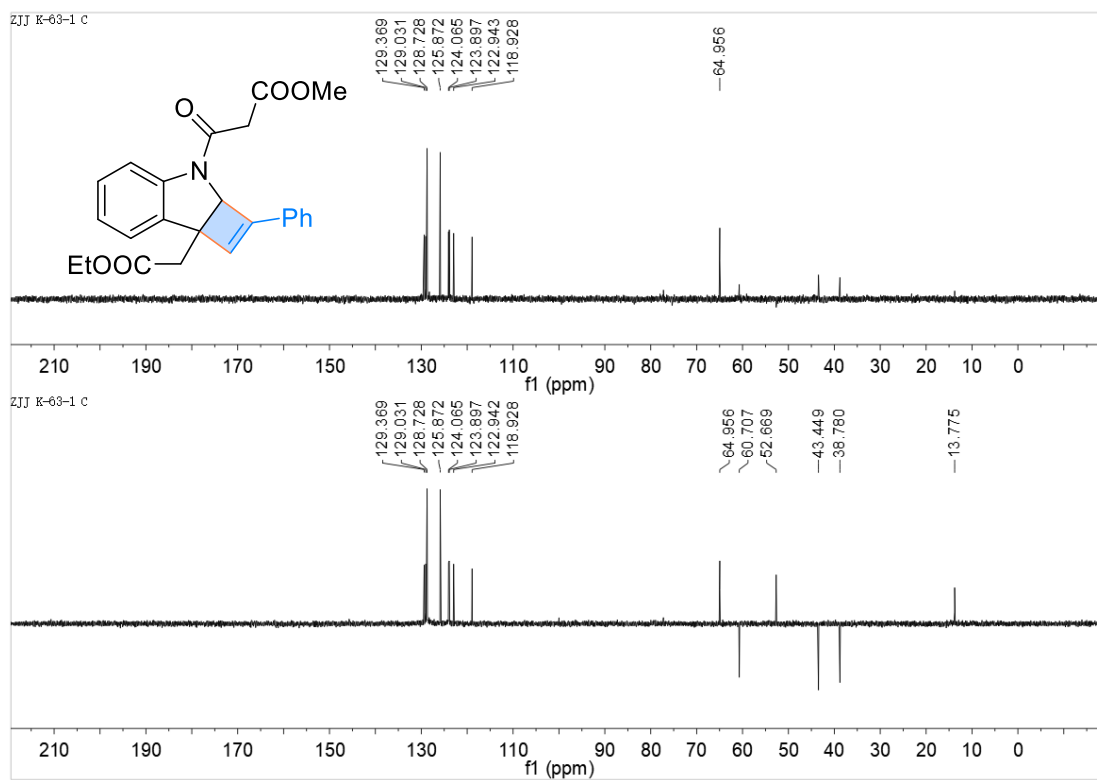

### 3p1 <sup>1</sup>H NMR

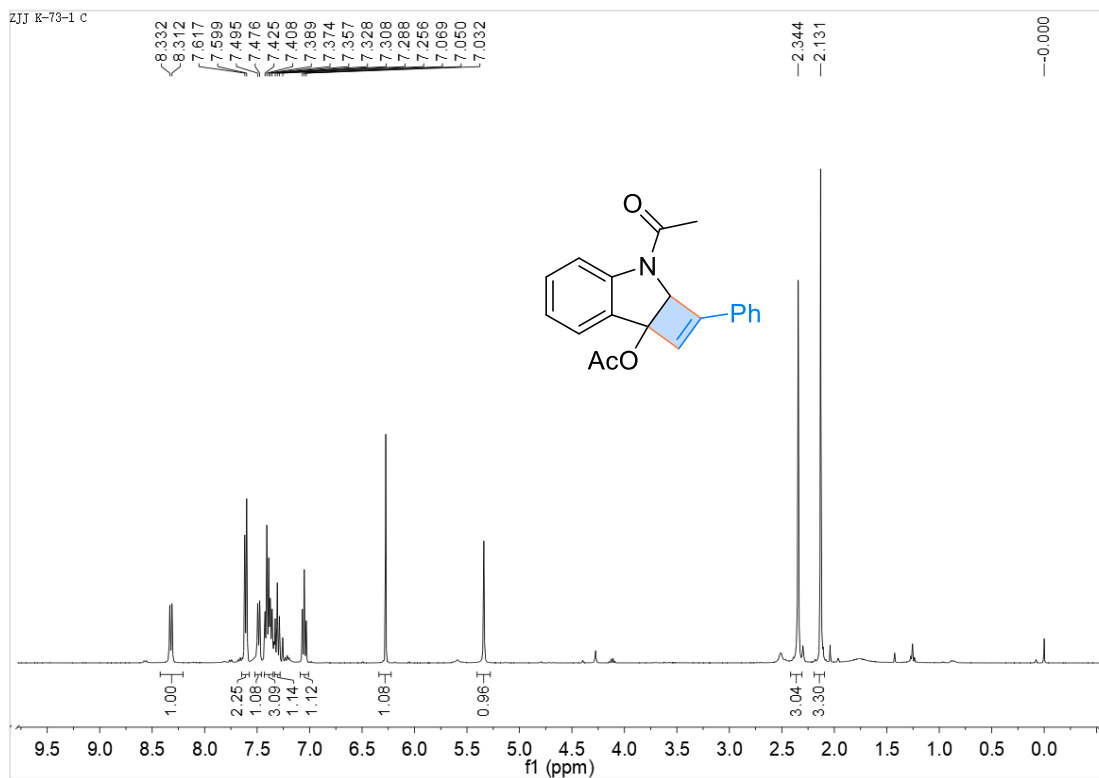

### 3p1 <sup>13</sup>C NMR

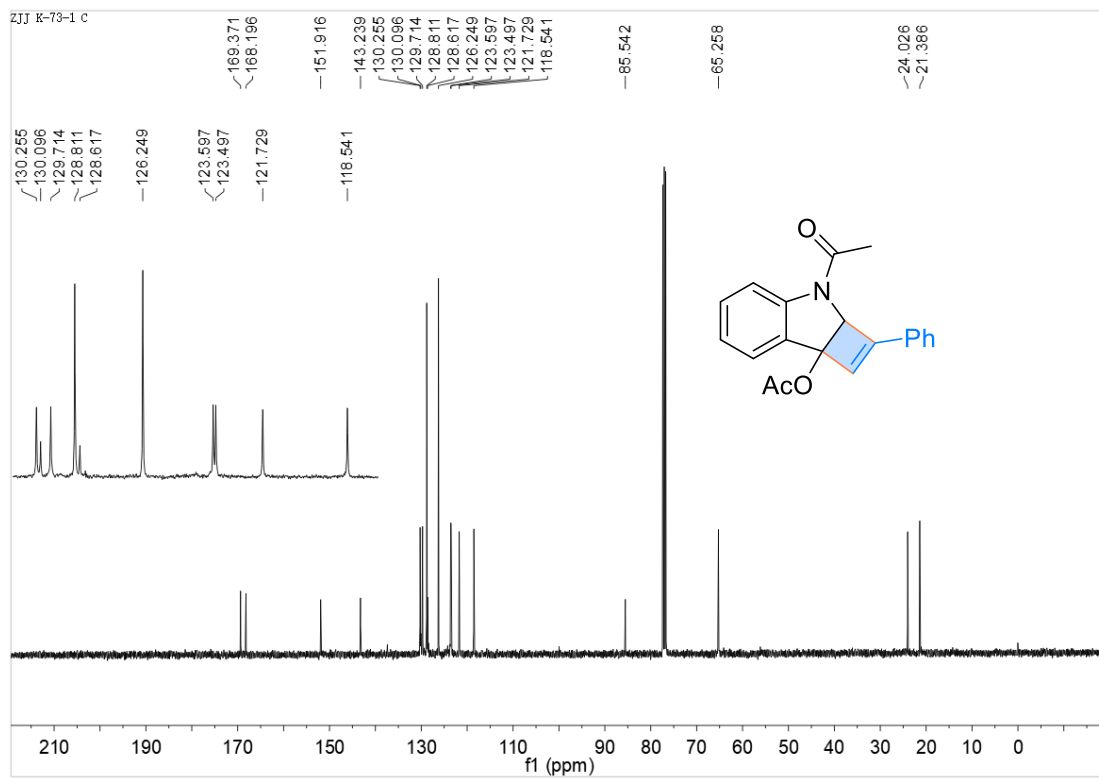



### 3p1 DEPT 90 and DEPT 135

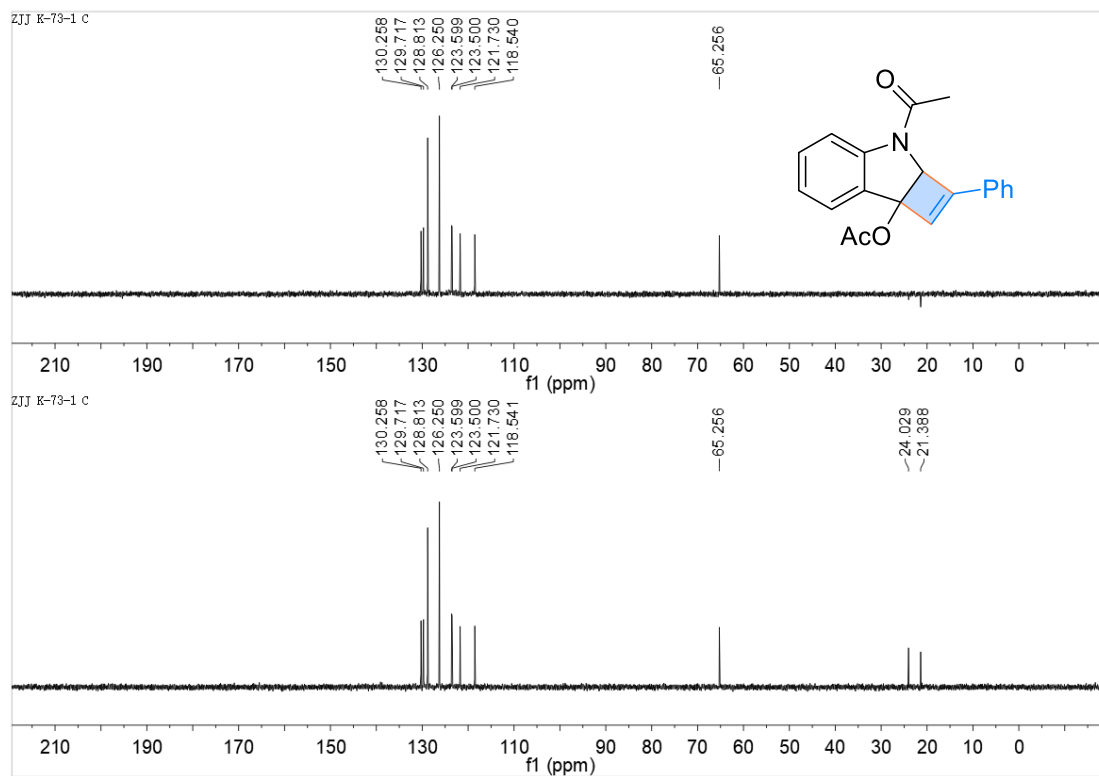

### 3p2 <sup>1</sup>H NMR

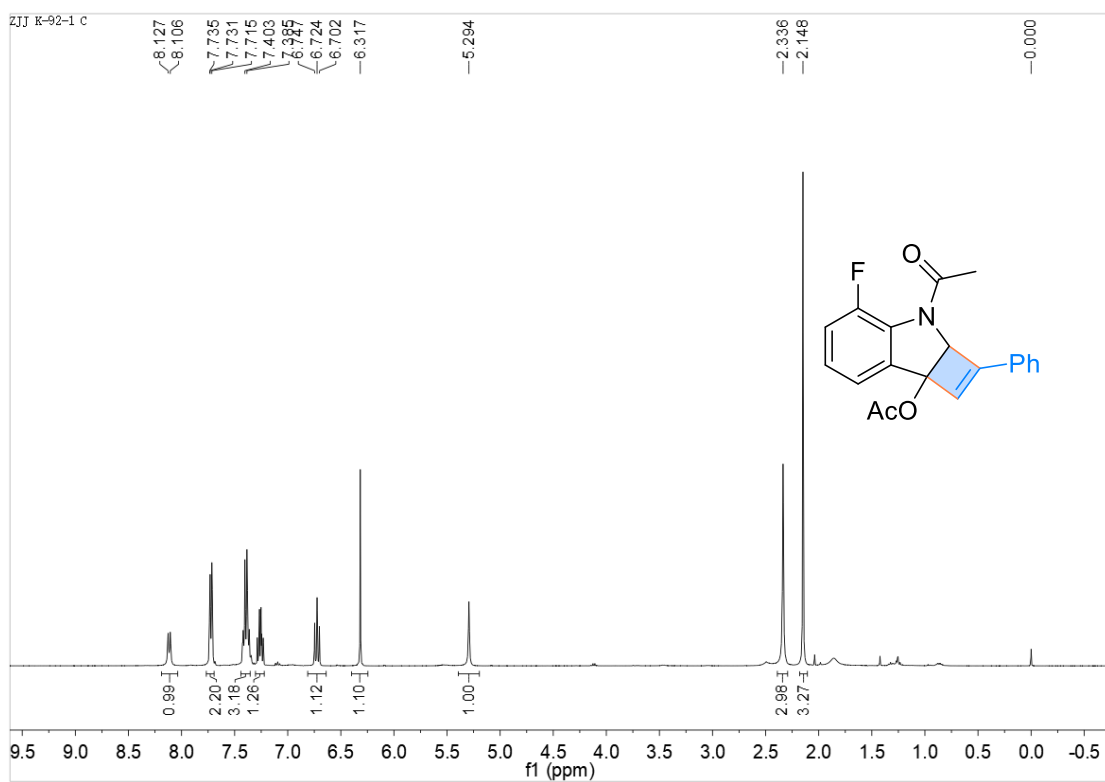

### 3p2 <sup>13</sup>C NMR

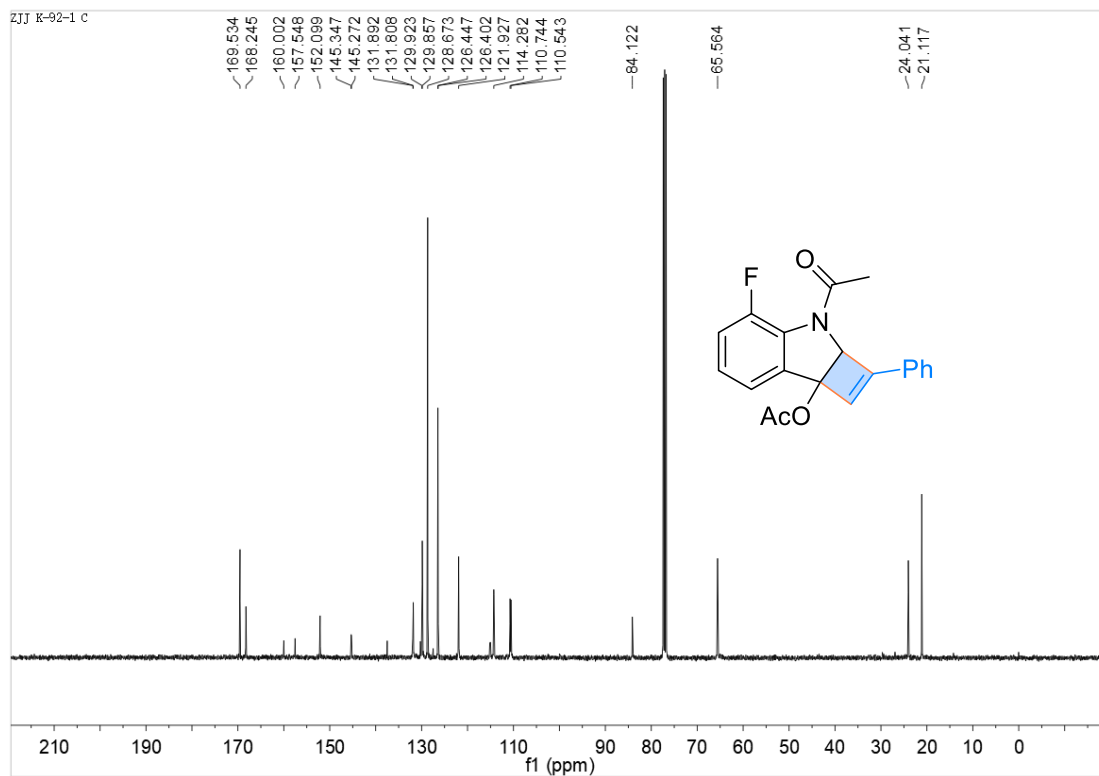

### 3p2 DEPT 90 and DEPT 135

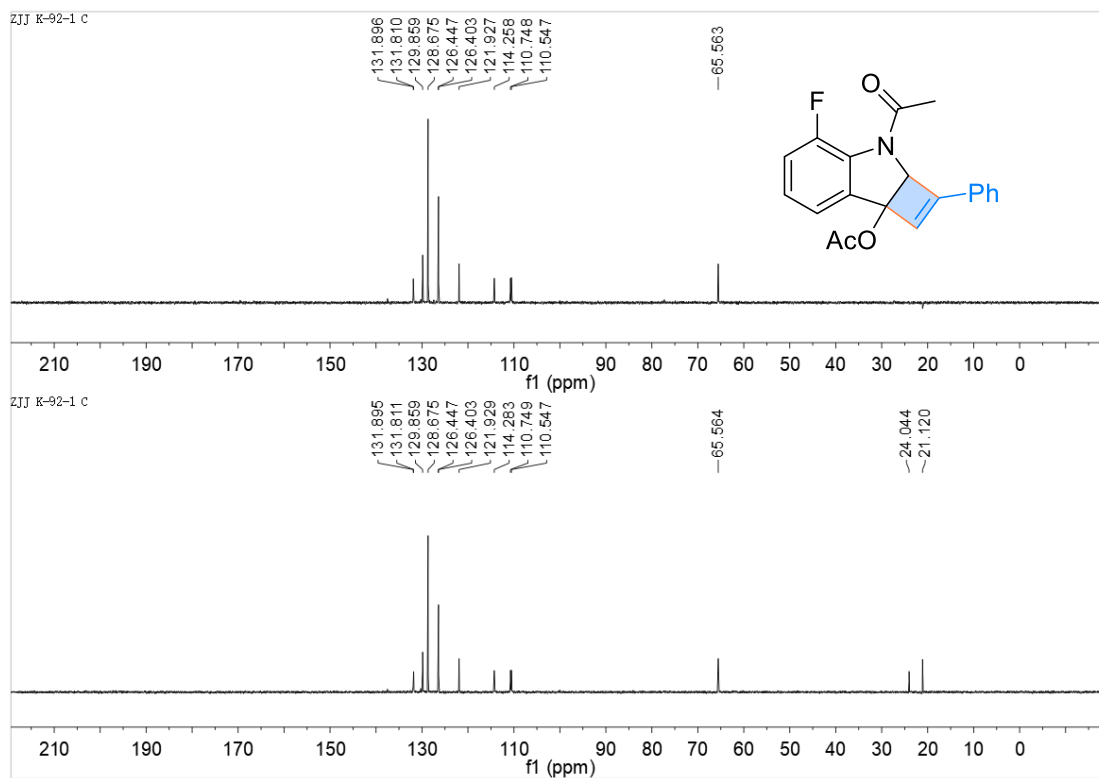

### 3p2 <sup>19</sup>F NMR

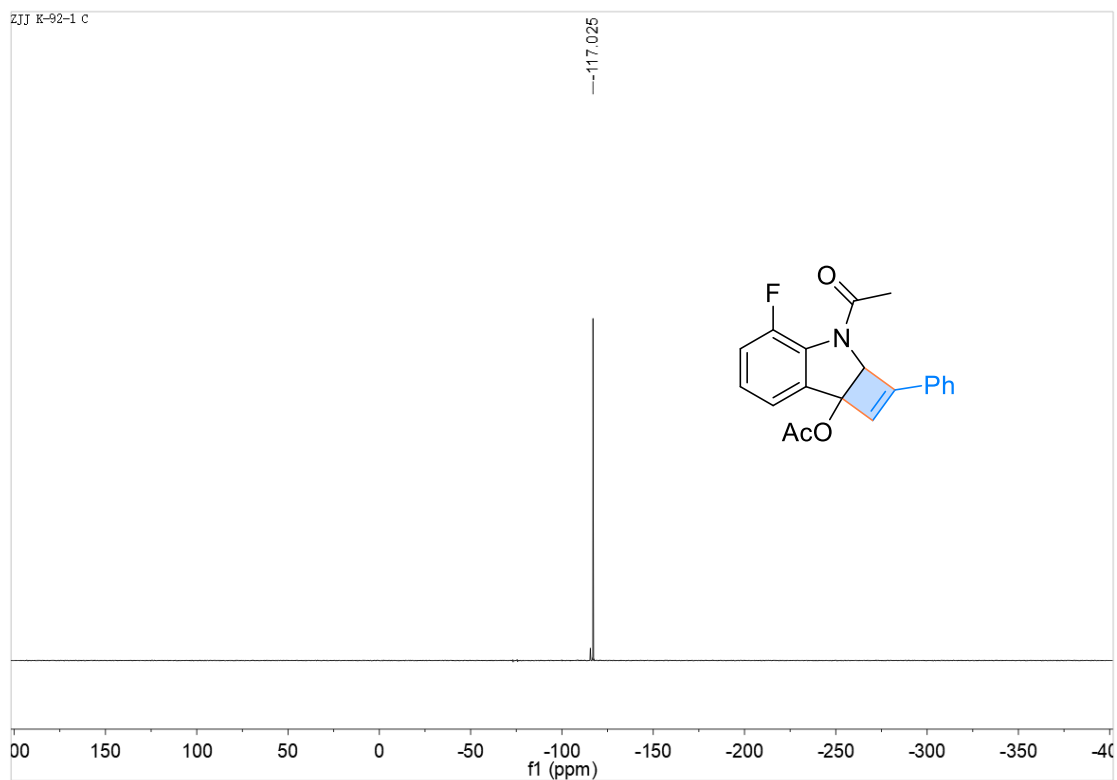

### 3q1 <sup>1</sup>H NMR

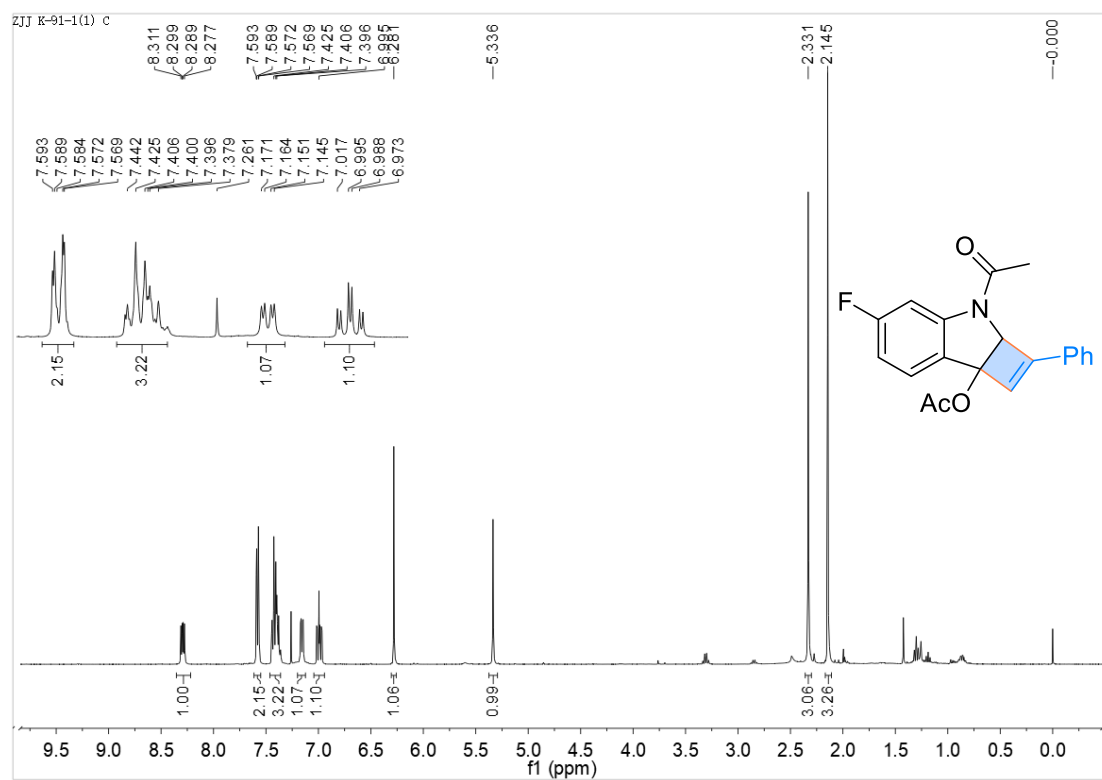

### 3q1 <sup>13</sup>C NMR

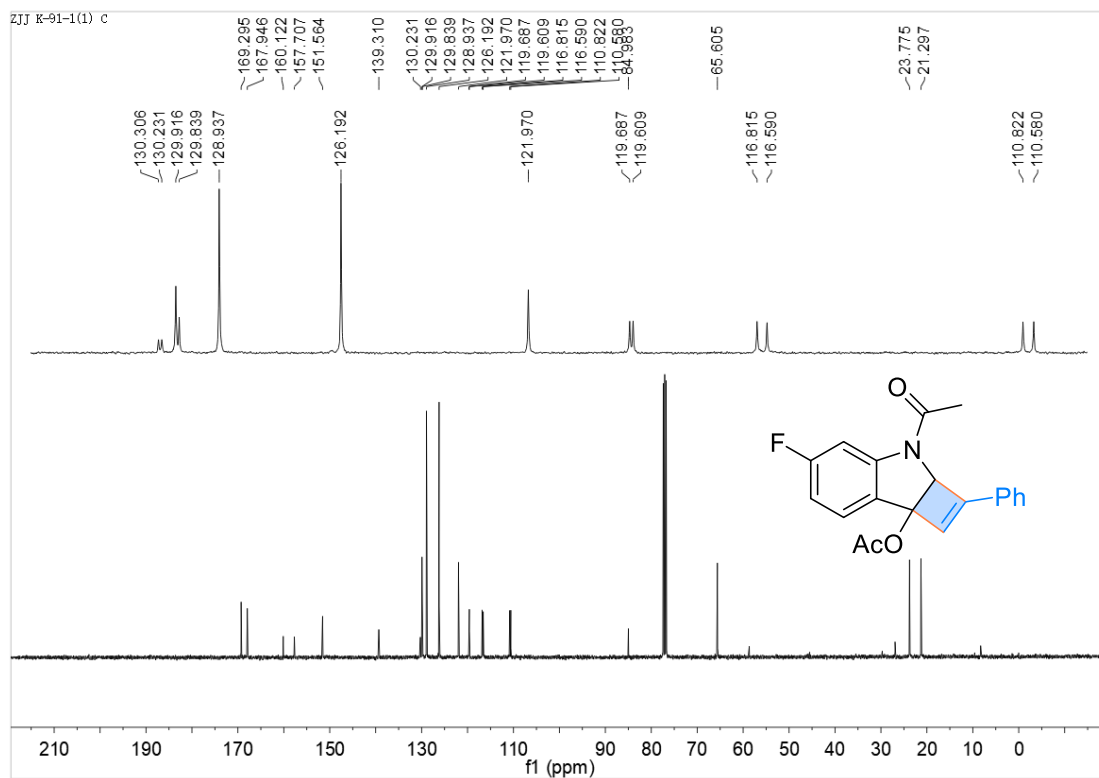

### 3q1 DEPT 90 and DEPT 135

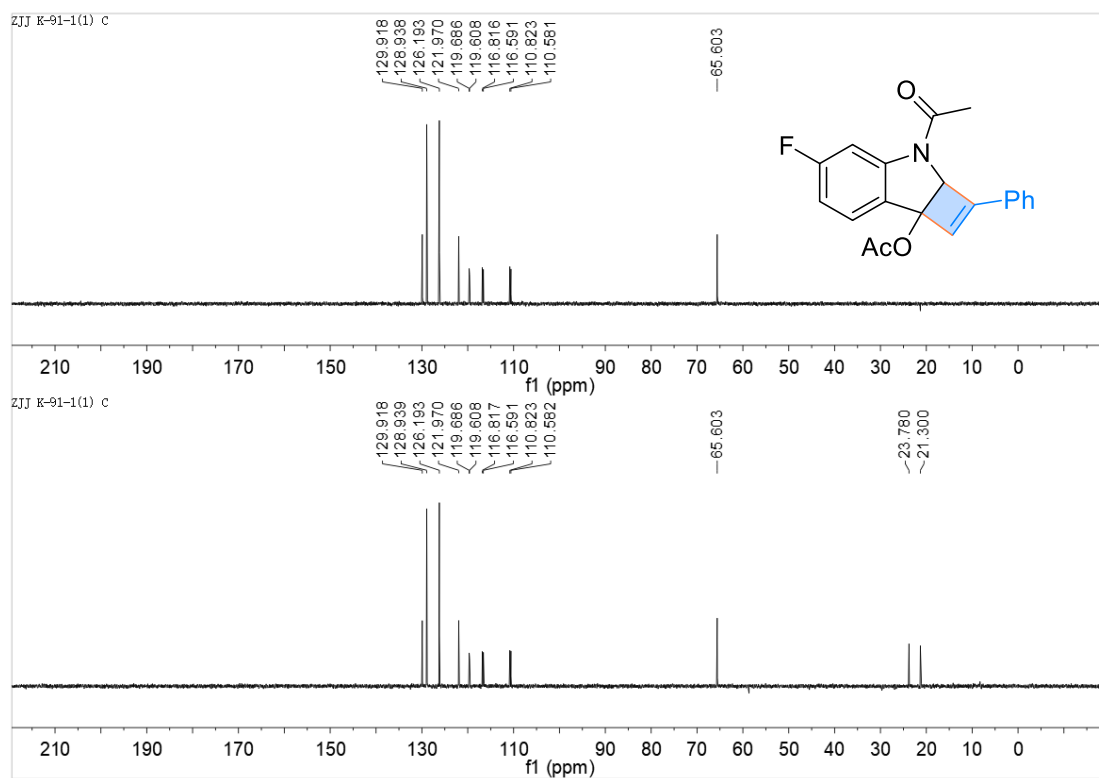

### 3q1 <sup>19</sup>F NMR

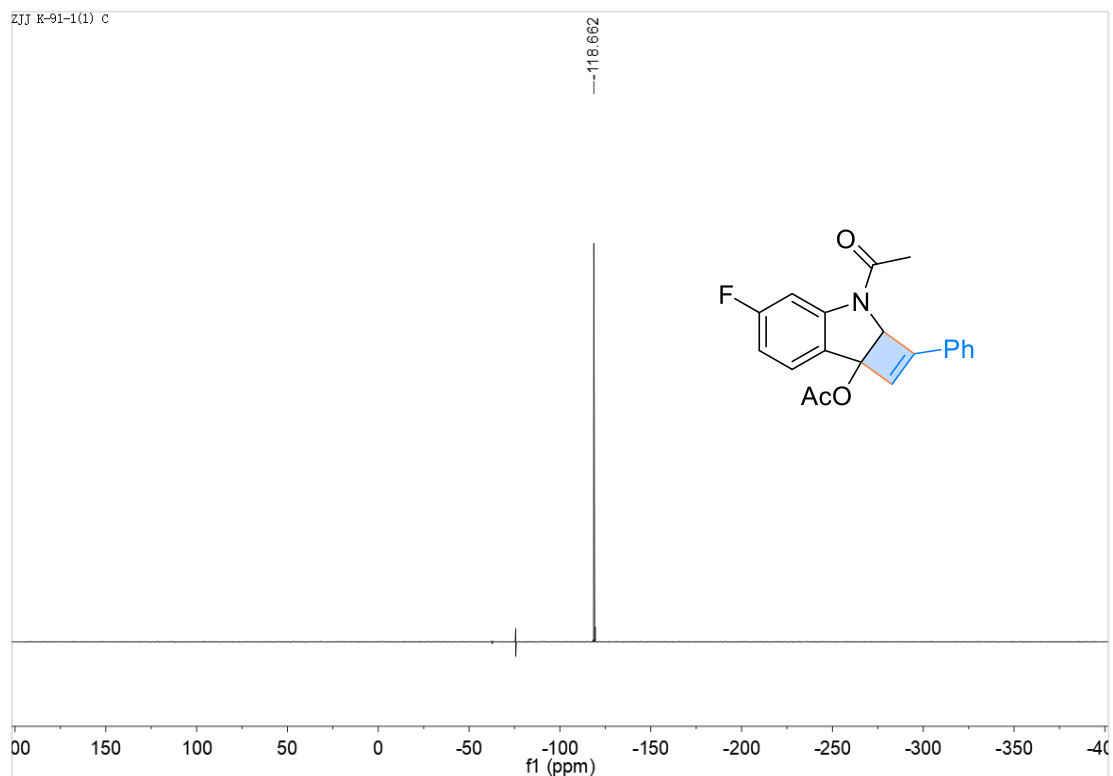

### 3q2 <sup>1</sup>H NMR

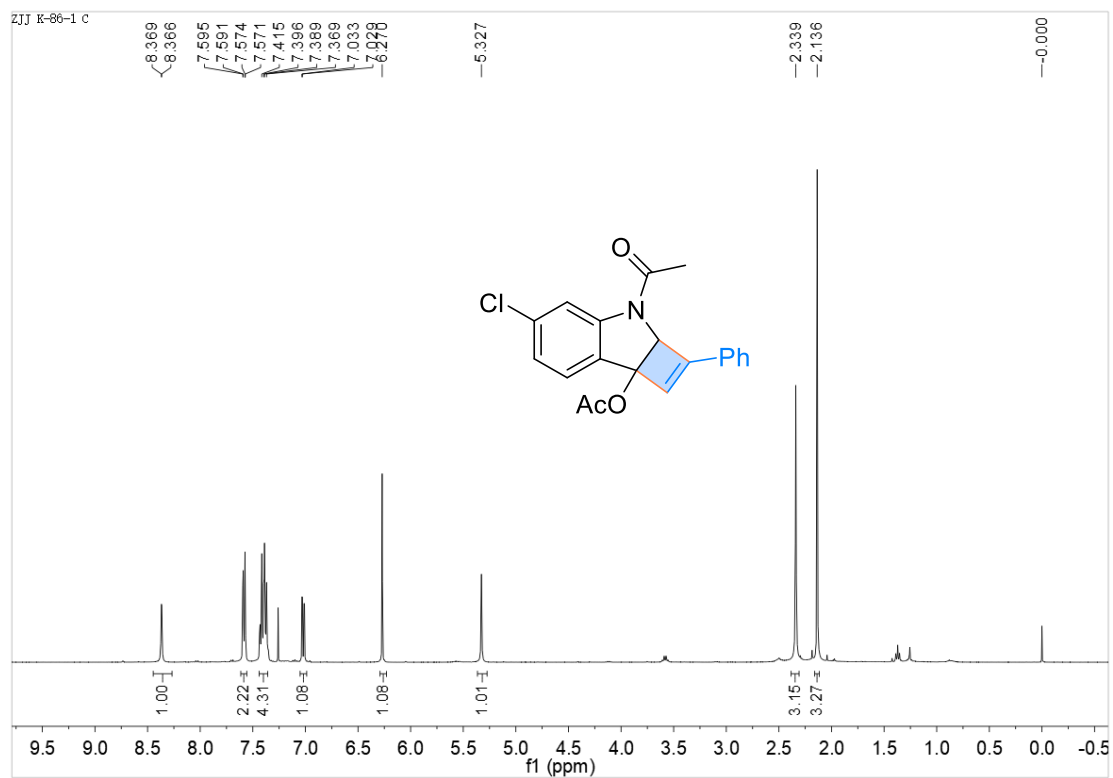

### 3q2 <sup>13</sup>C NMR

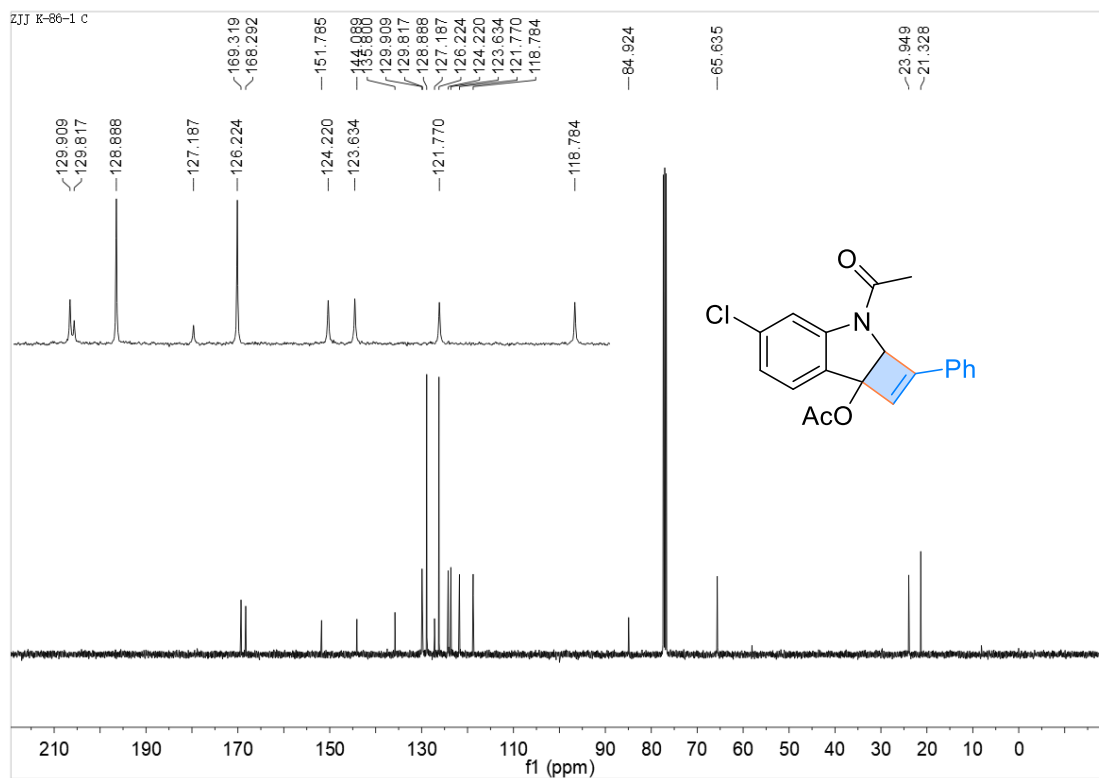

### 3q2 DEPT 90 and DEPT 135

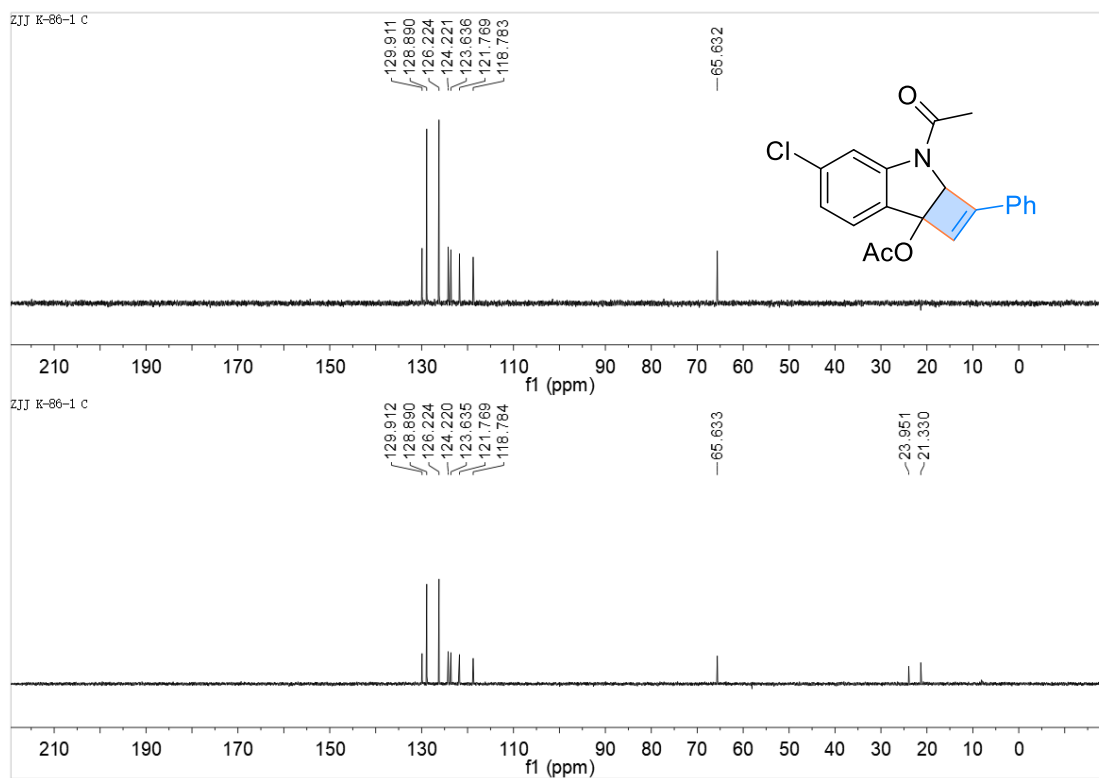

### 3r1 <sup>1</sup>H NMR

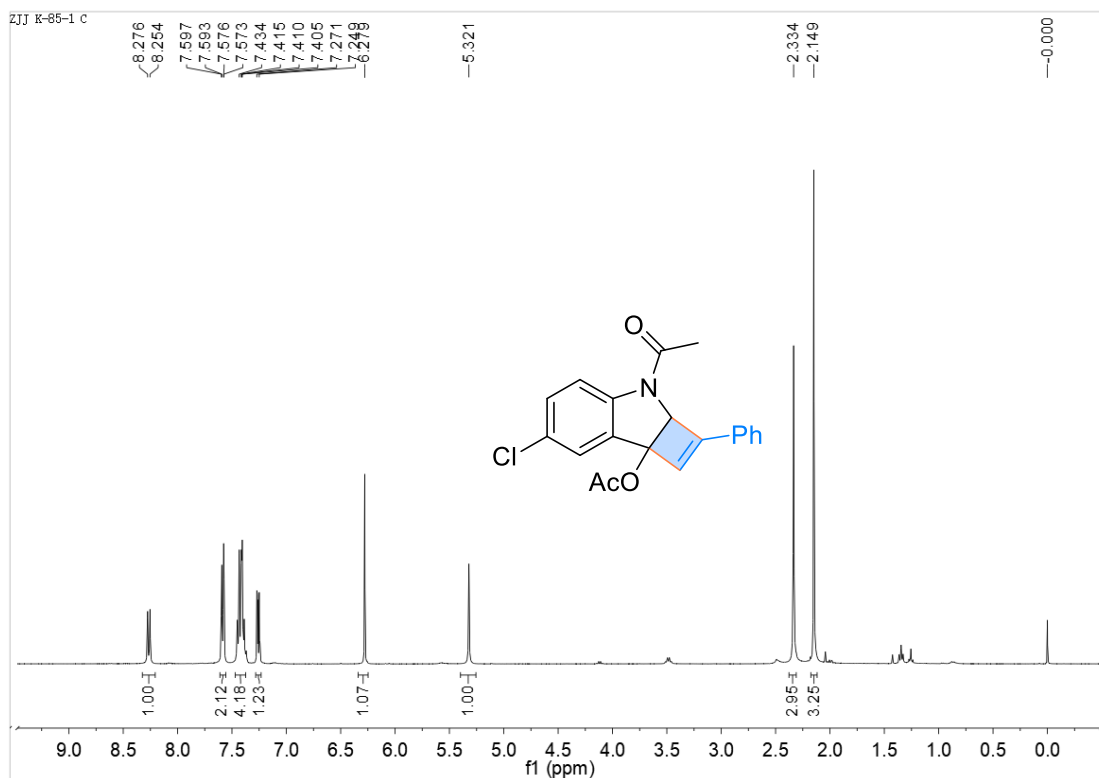

### 3r1 <sup>13</sup>C NMR

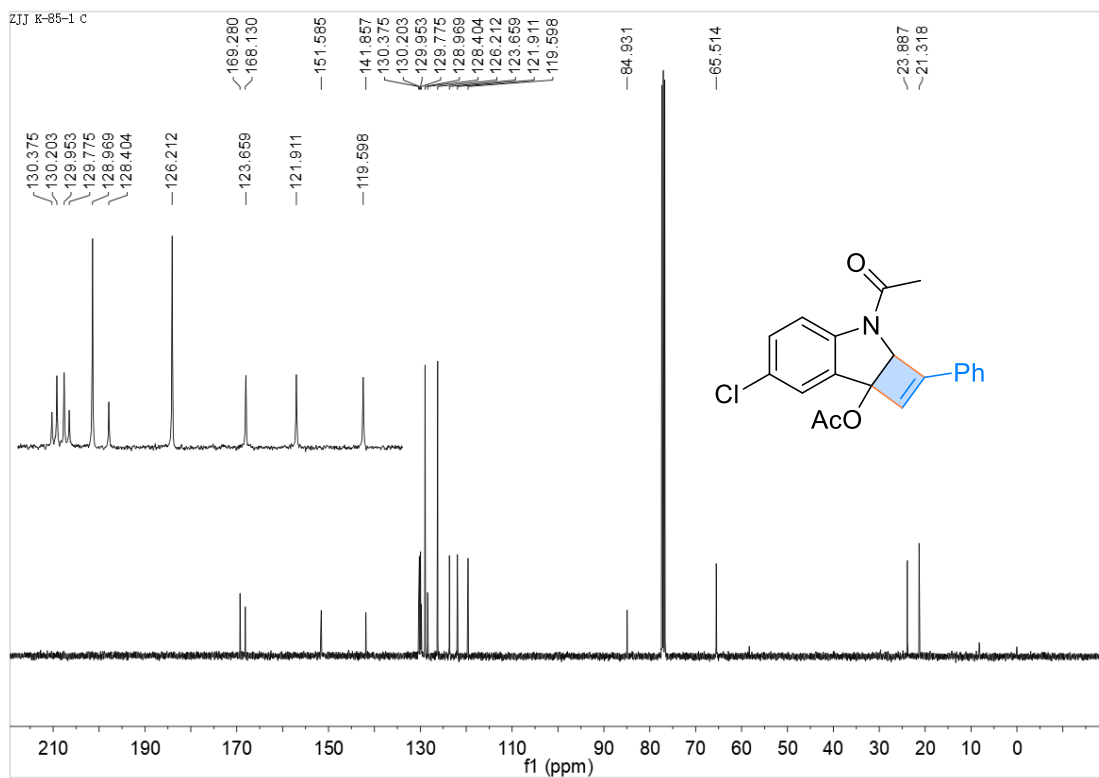

### 3r1 DEPT 90 and DEPT 135

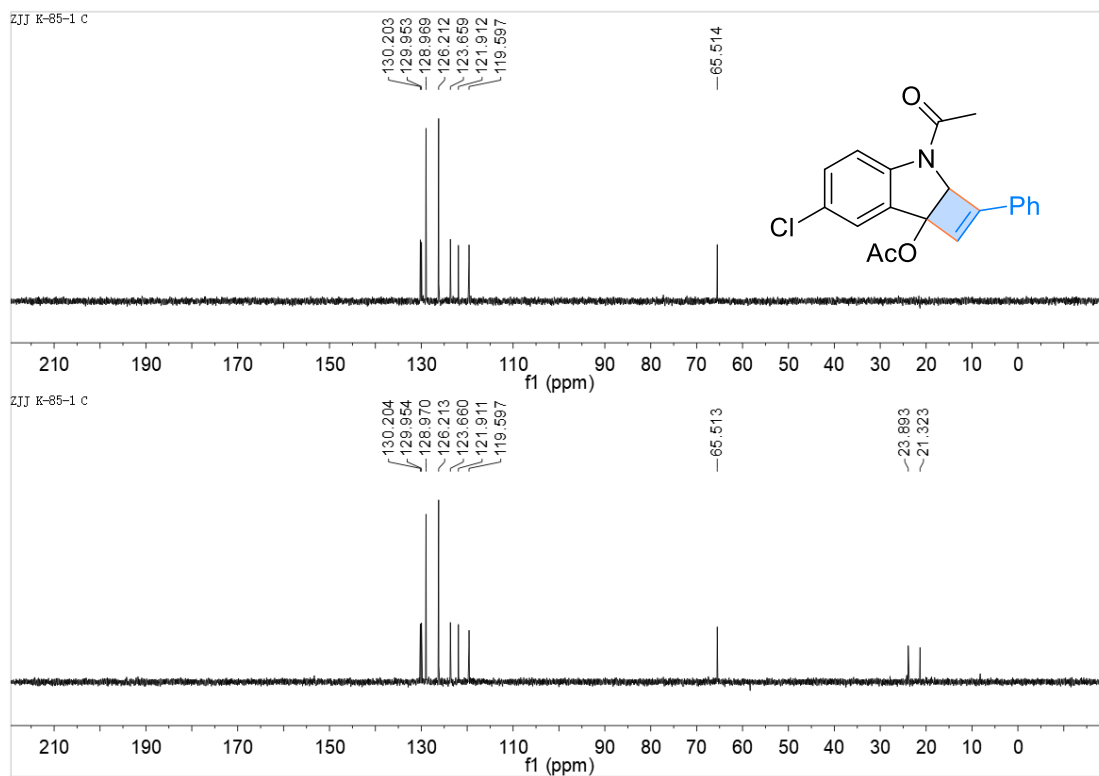

### 3r2 <sup>1</sup>H NMR

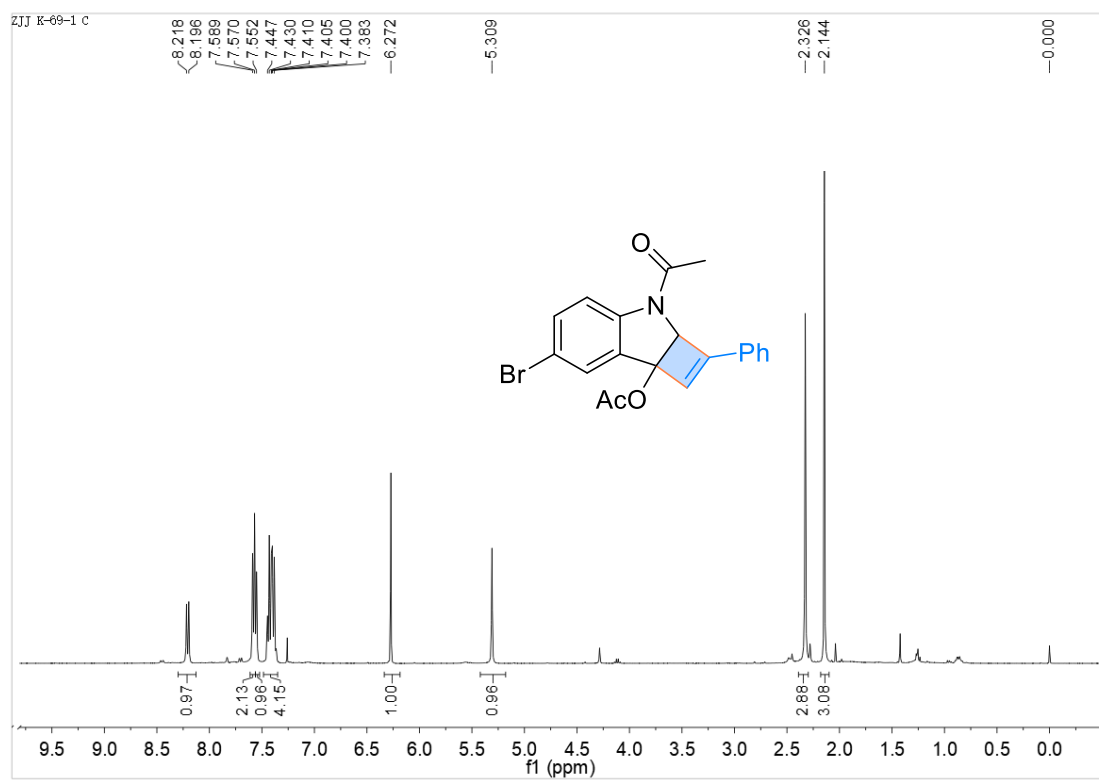



### 3r2 <sup>13</sup>C NMR

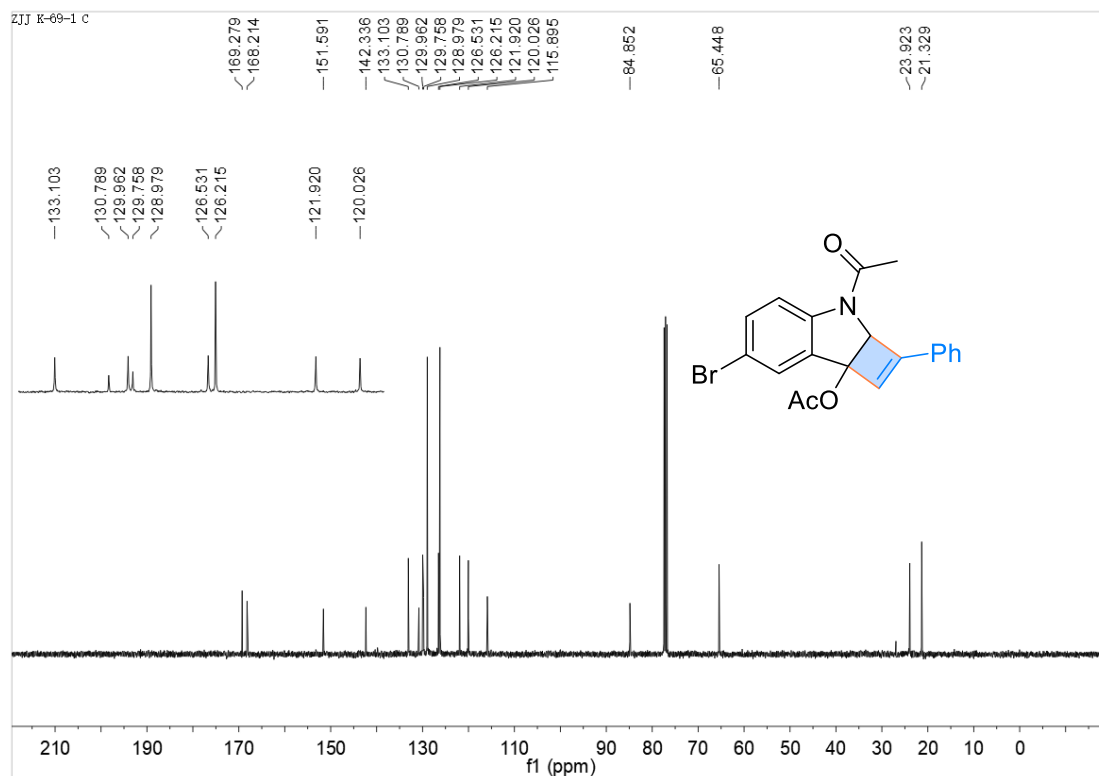

### 3r2 DEPT 90 and DEPT 135

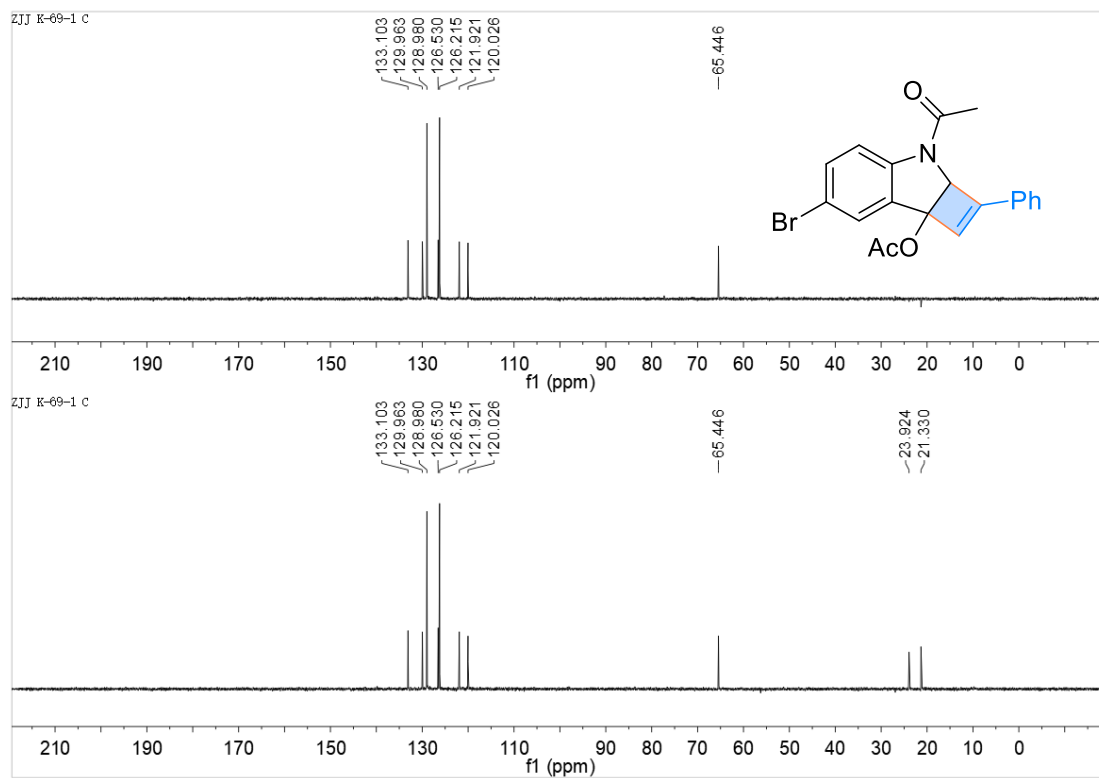

### 3r3 <sup>1</sup>H NMR

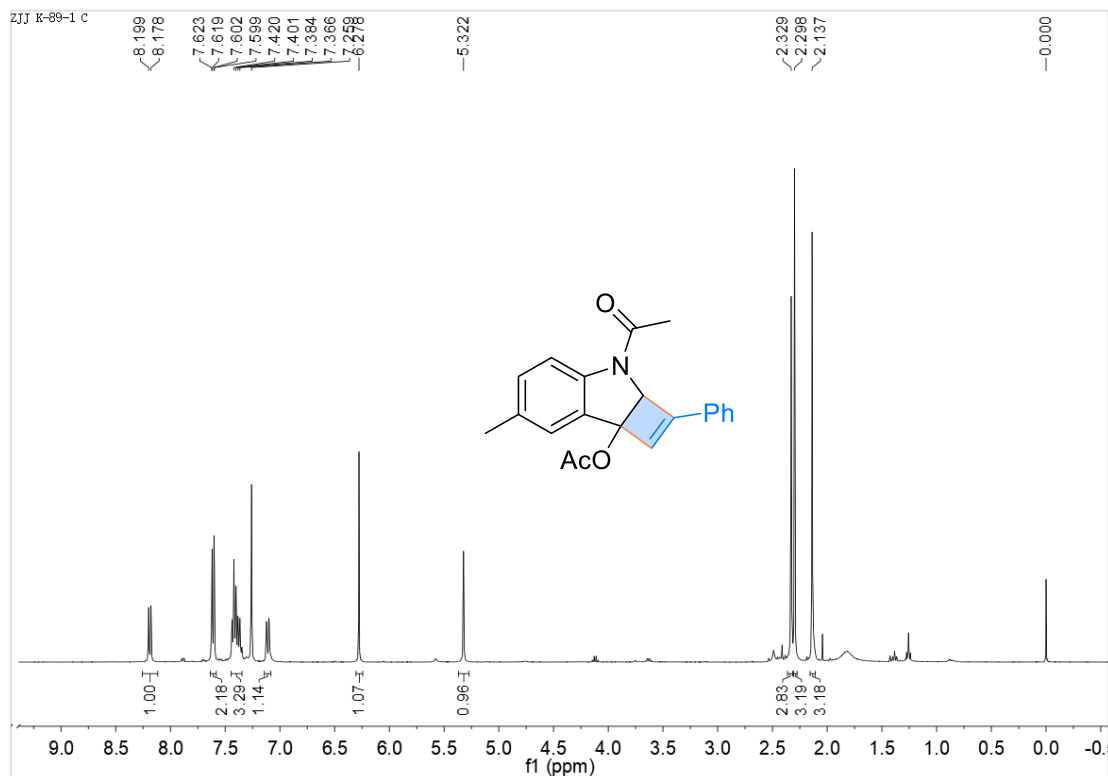

### 3r3 <sup>13</sup>C NMR

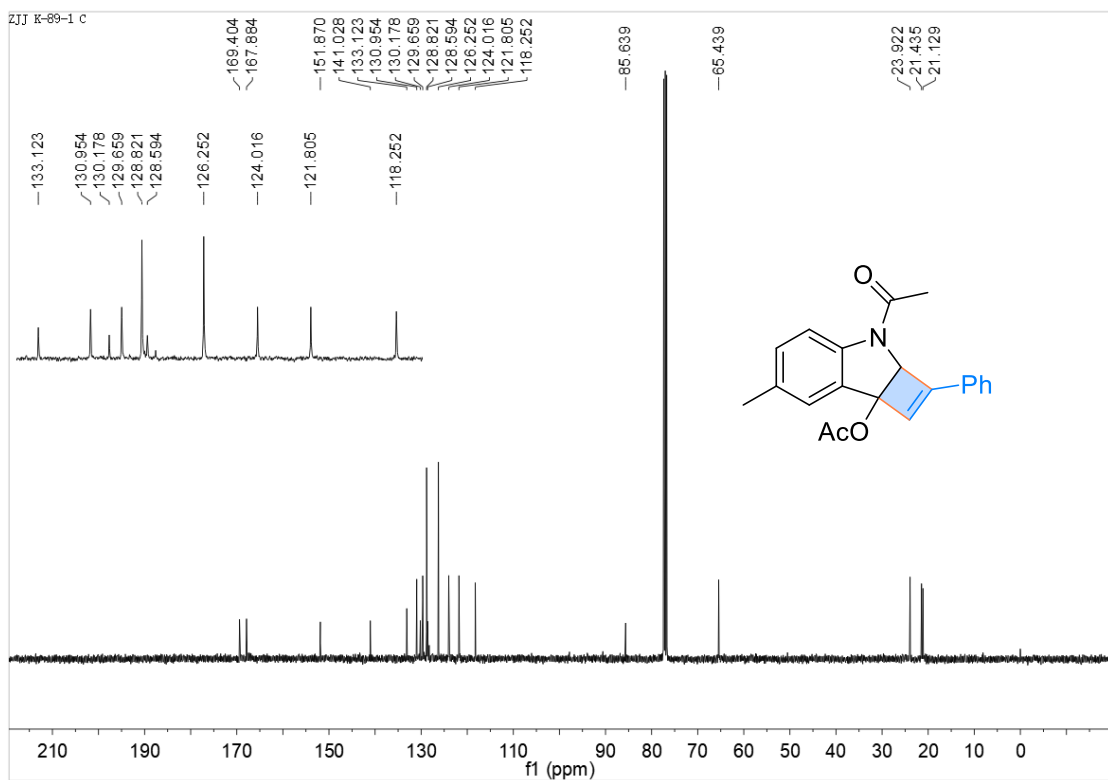

### 3r3 DEPT 90 and DEPT 135

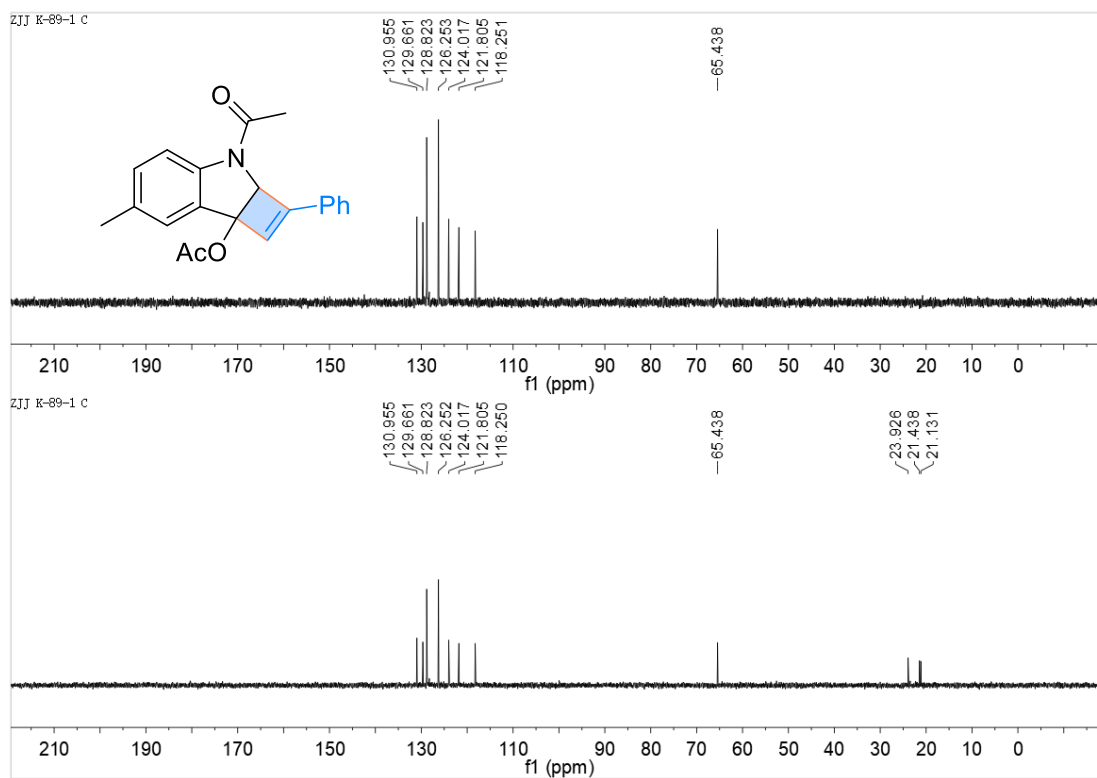

### 3r4 <sup>1</sup>H NMR

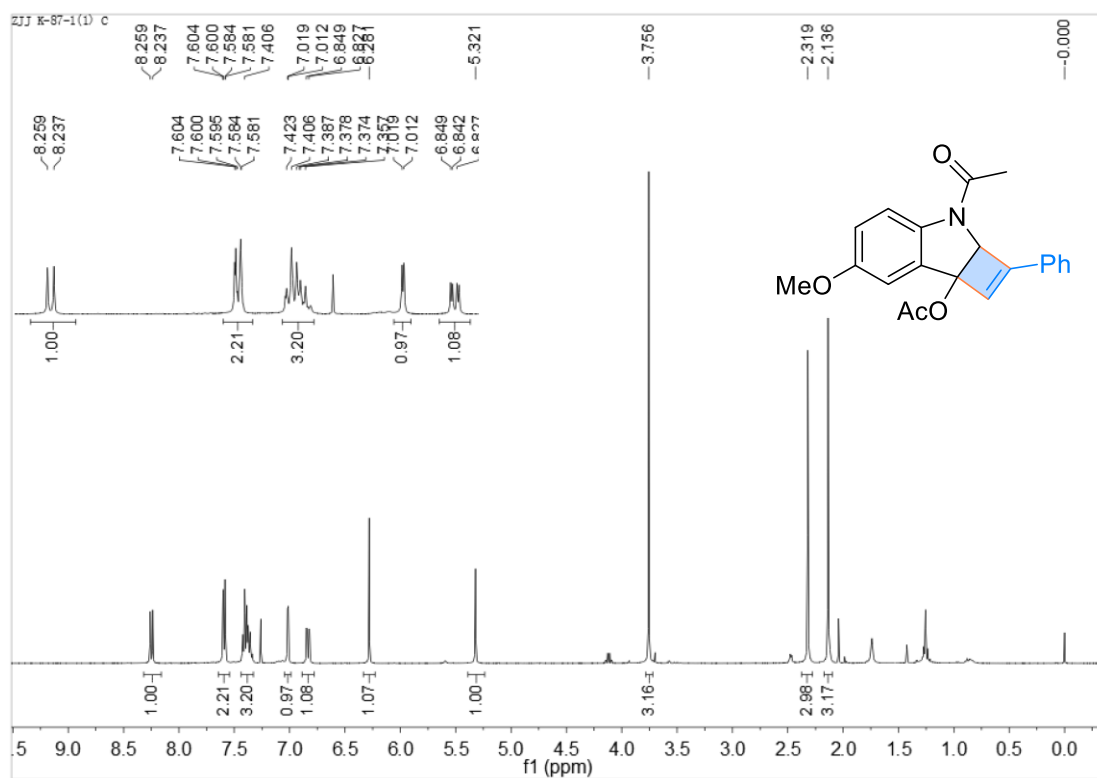

### 3r4 <sup>13</sup>C NMR

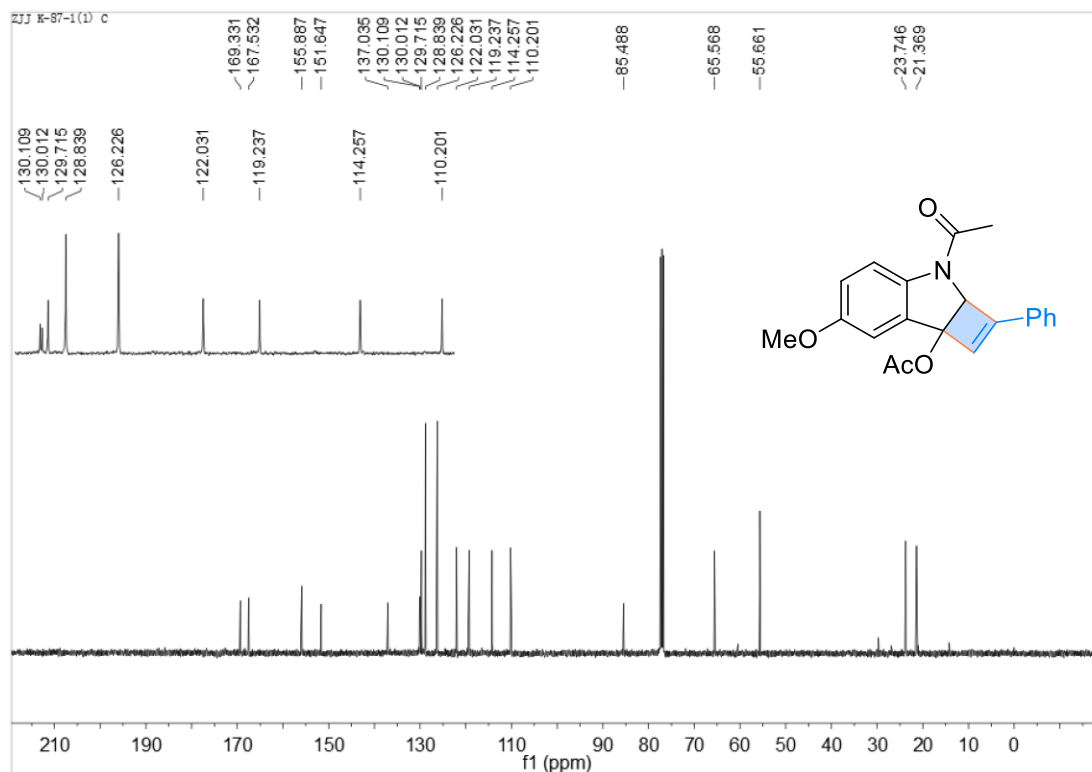

### 3r4 DEPT 90 and DEPT 135

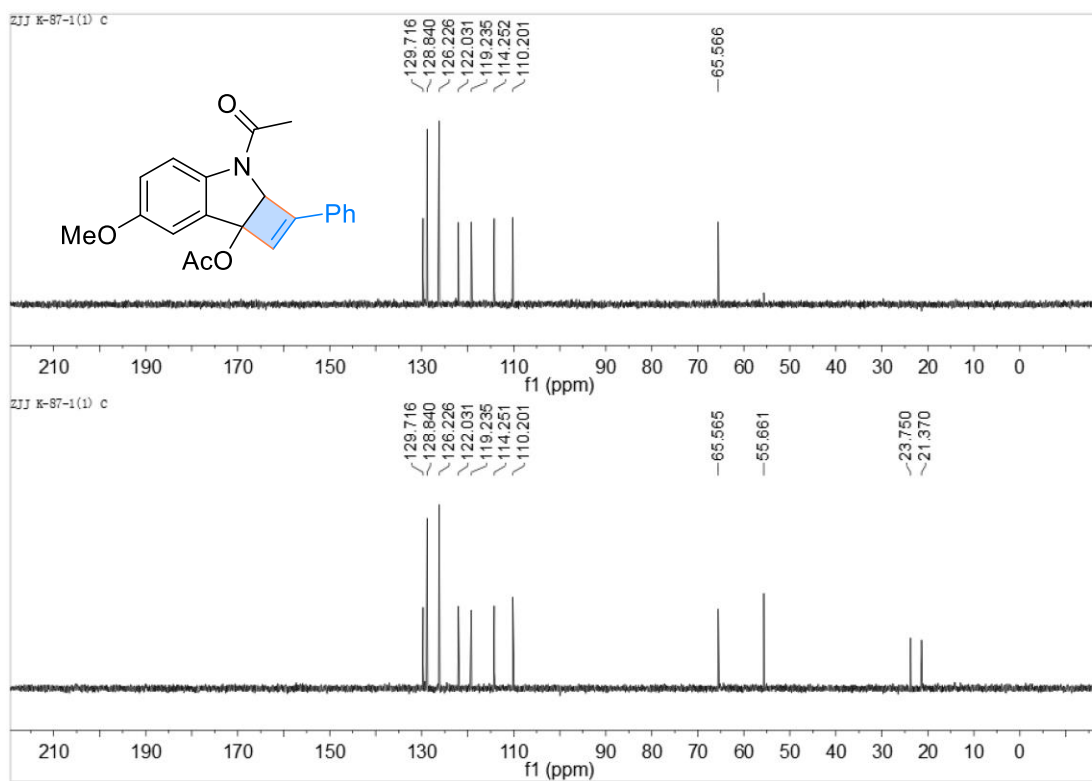

### 3s <sup>1</sup>H NMR

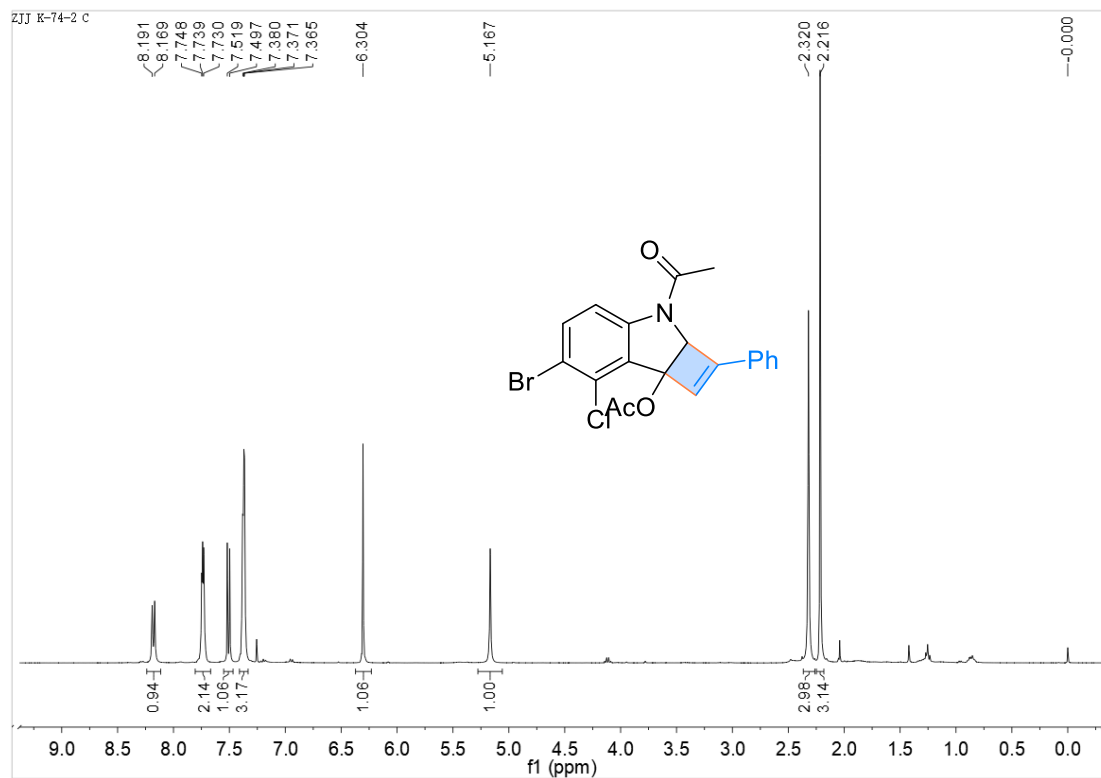

### 3s <sup>13</sup>C NMR

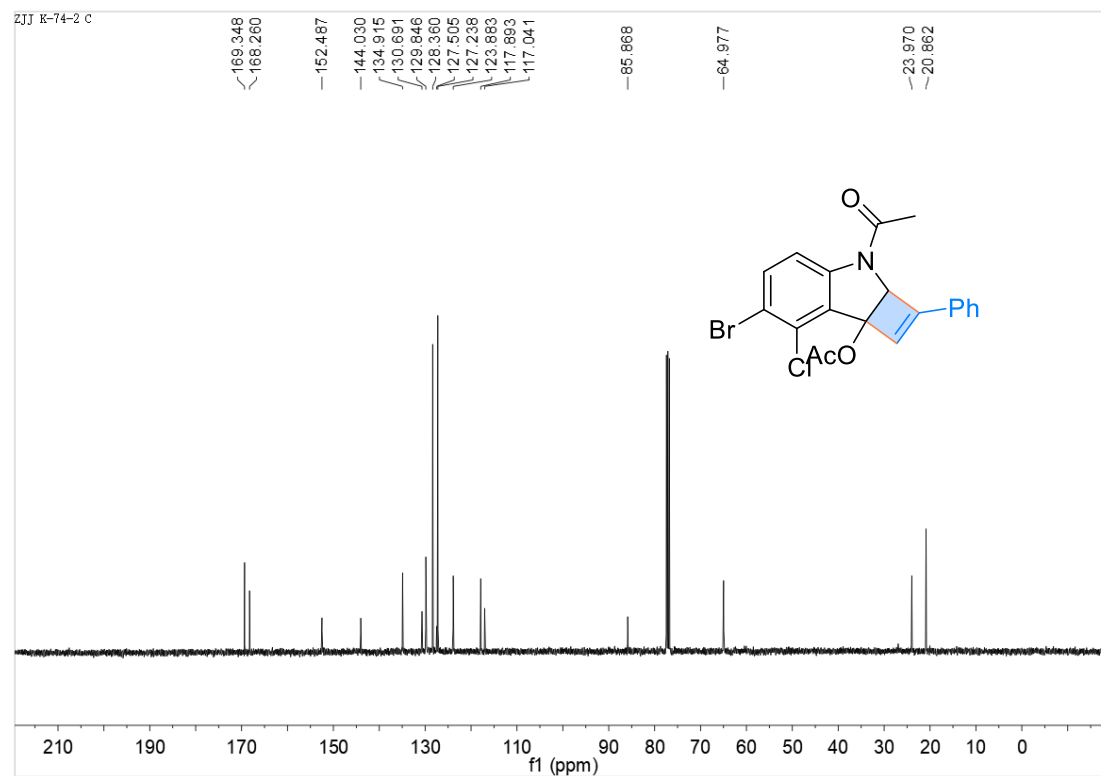

### 3s DEPT 90 and DEPT 135

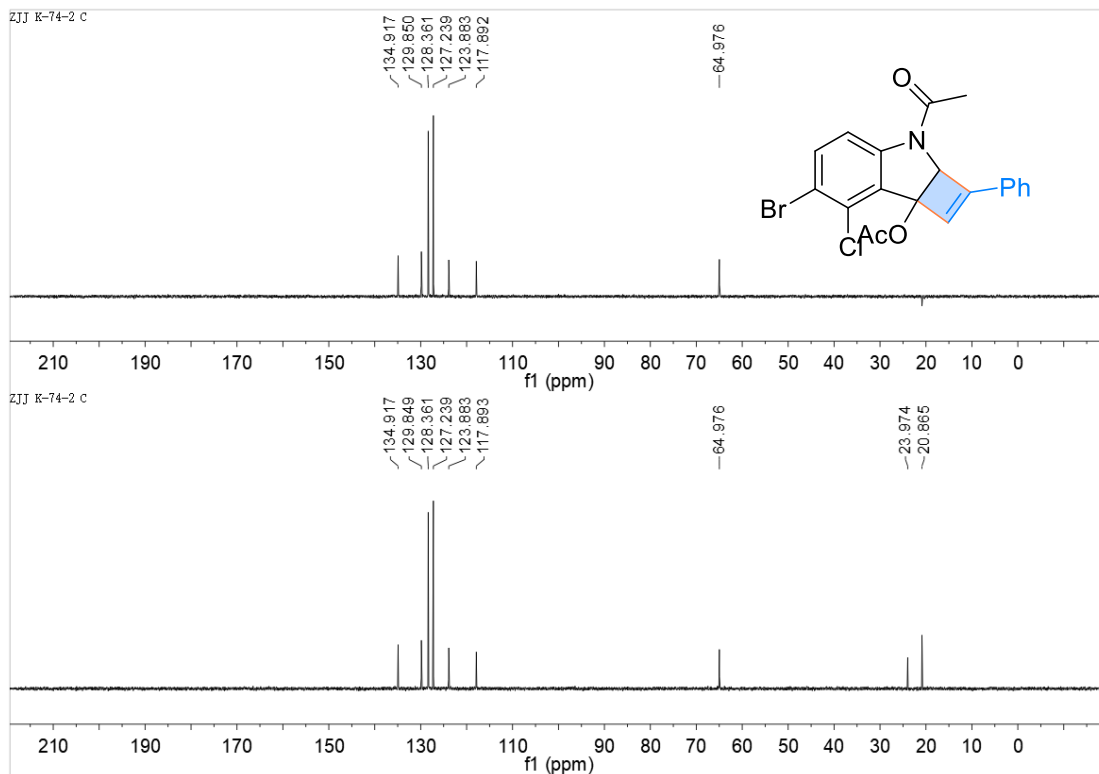

### 112 <sup>1</sup>H NMR

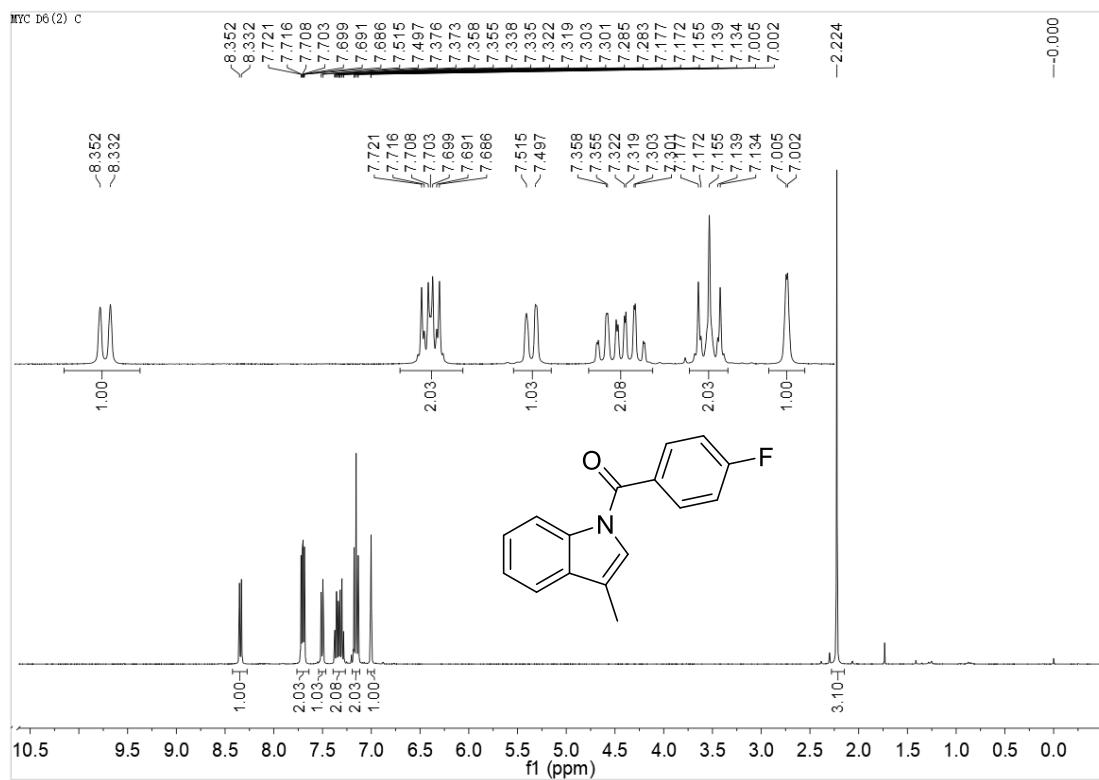

### 112 <sup>13</sup>C NMR

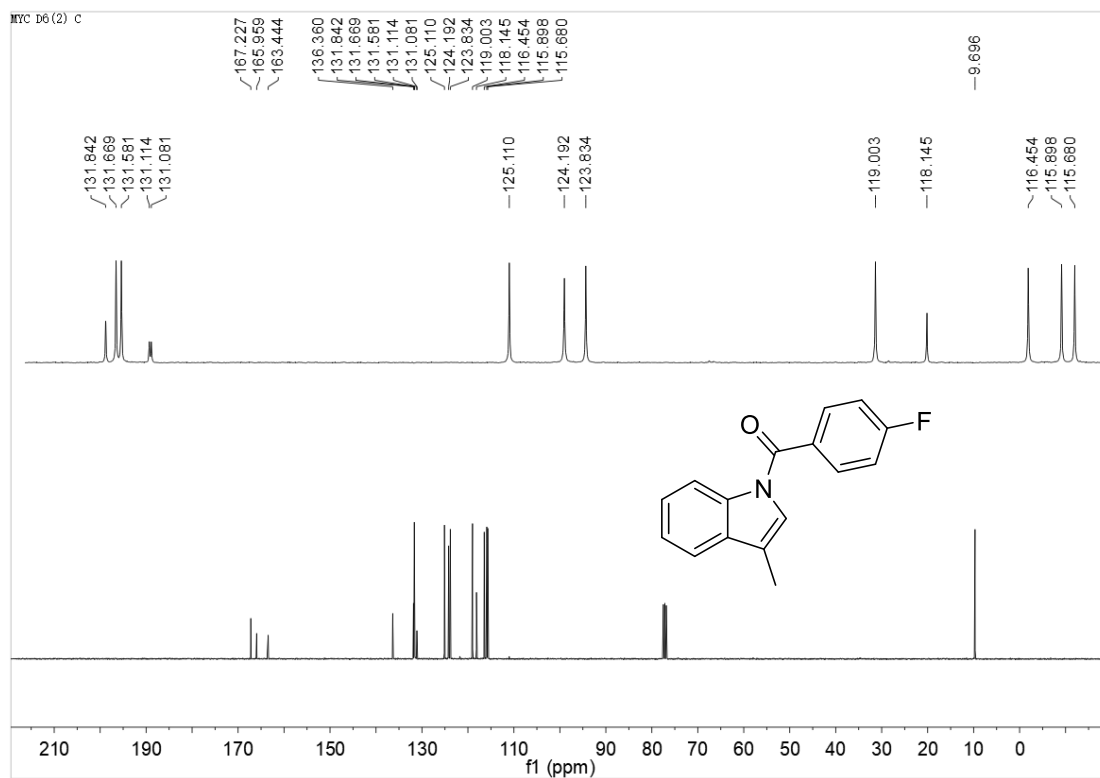

### 112 DEPT 90 and DEPT 135

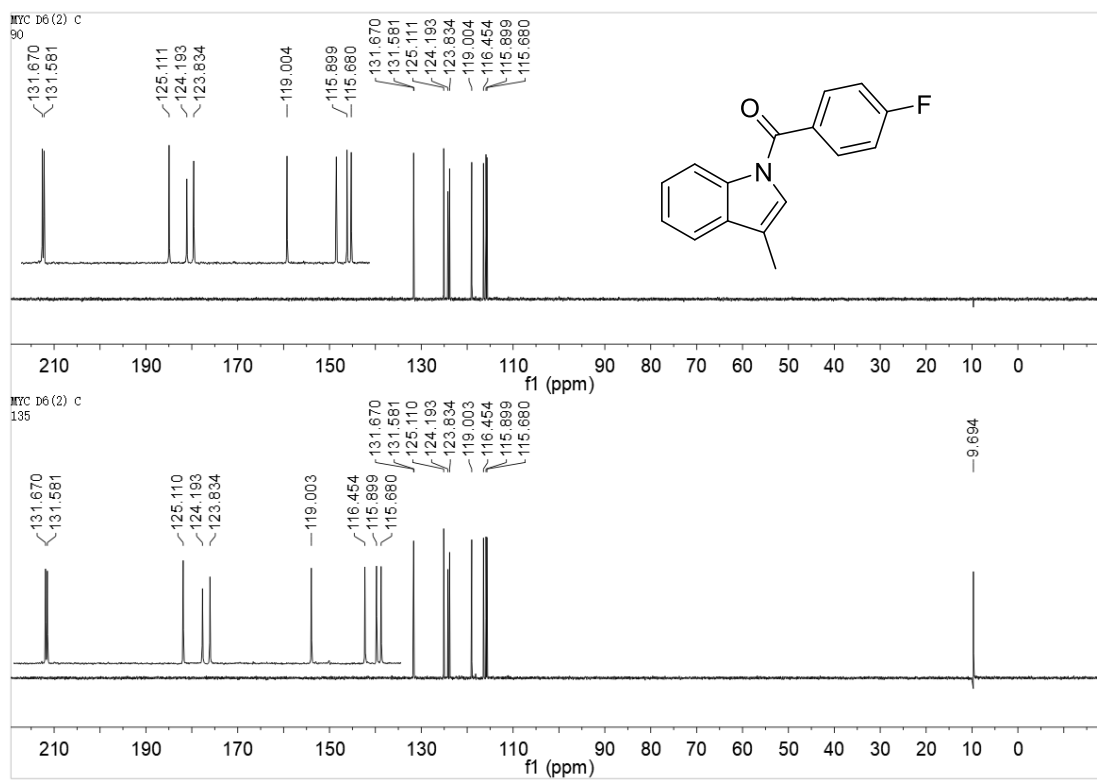

### 1m1 <sup>1</sup>H NMR

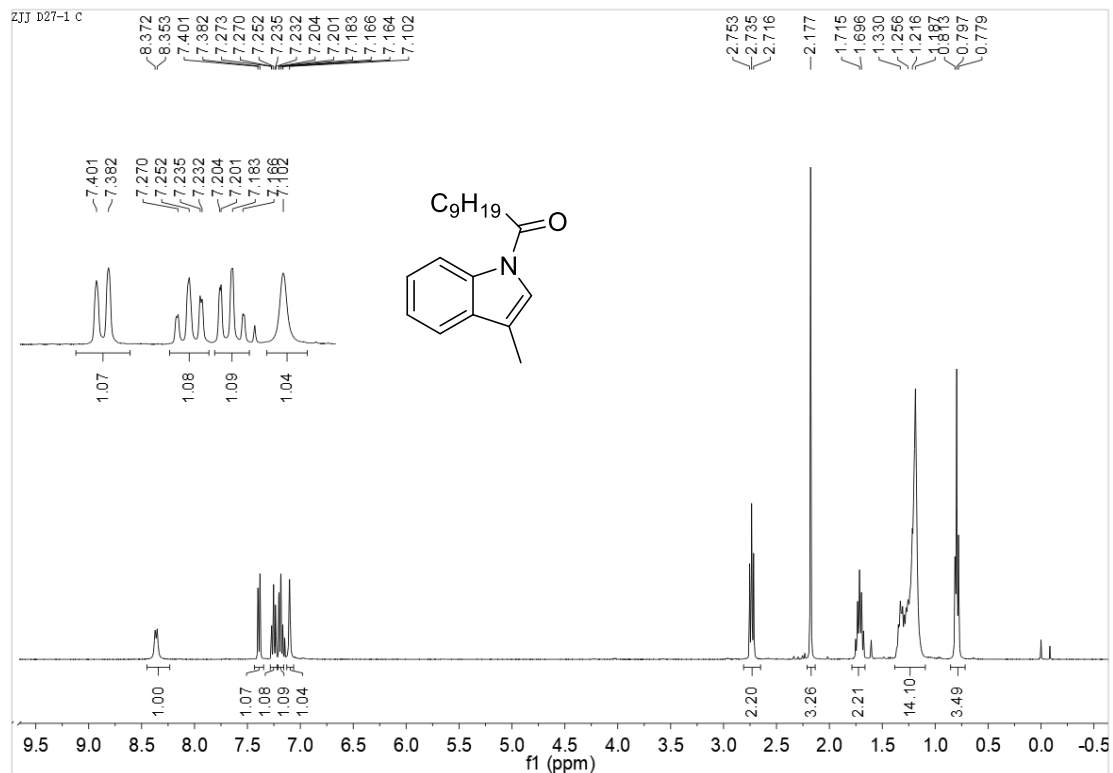

### 1m1 <sup>13</sup>C NMR

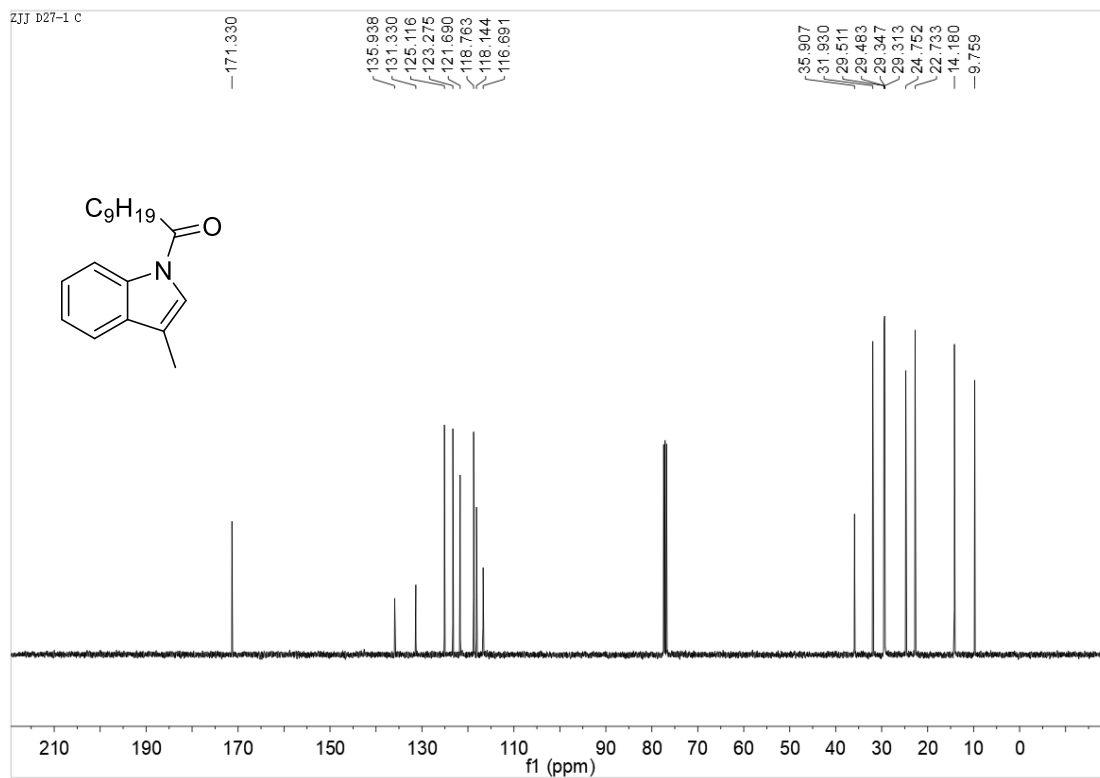



### 1m1 DEPT 90 and DEPT 135

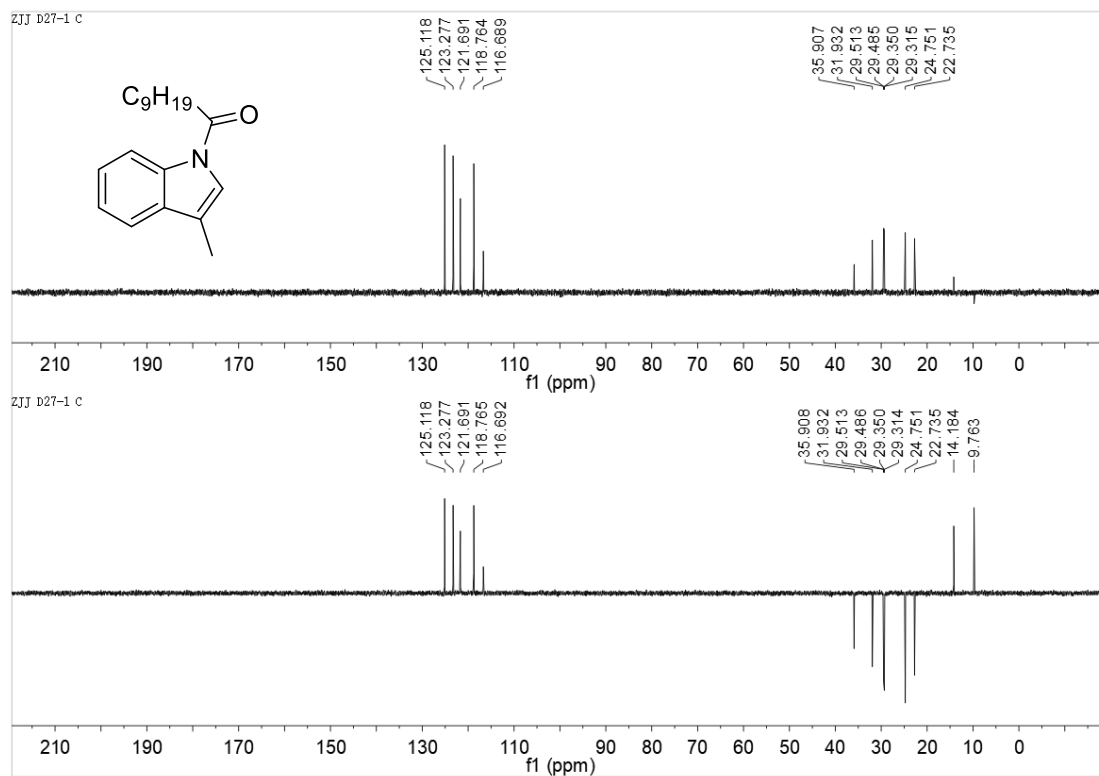

### 1o <sup>1</sup>H NMR

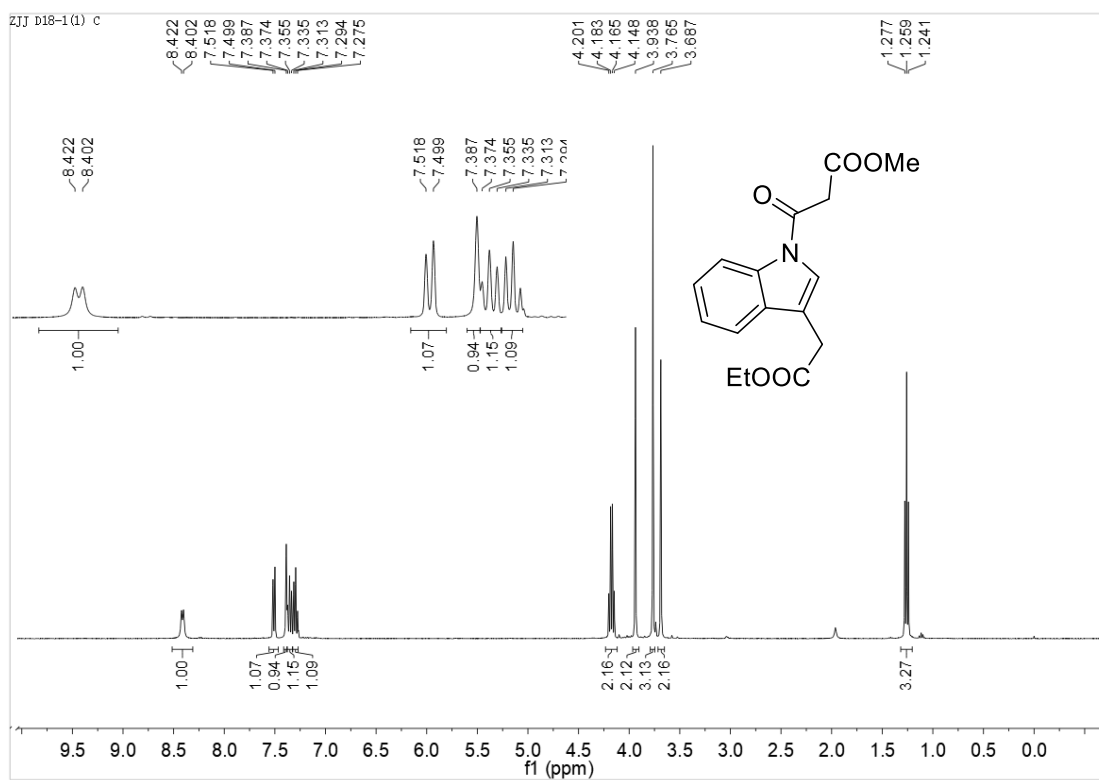

### 1o <sup>13</sup>C NMR

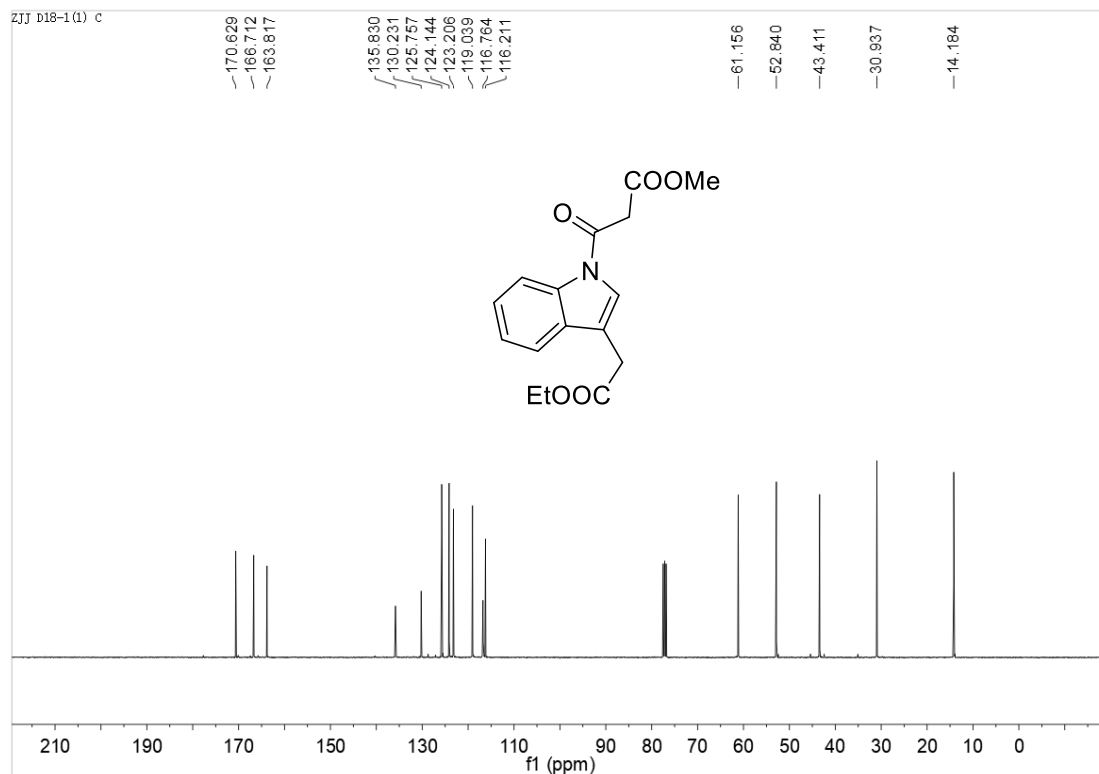

### 1o DEPT 90 and DEPT 135

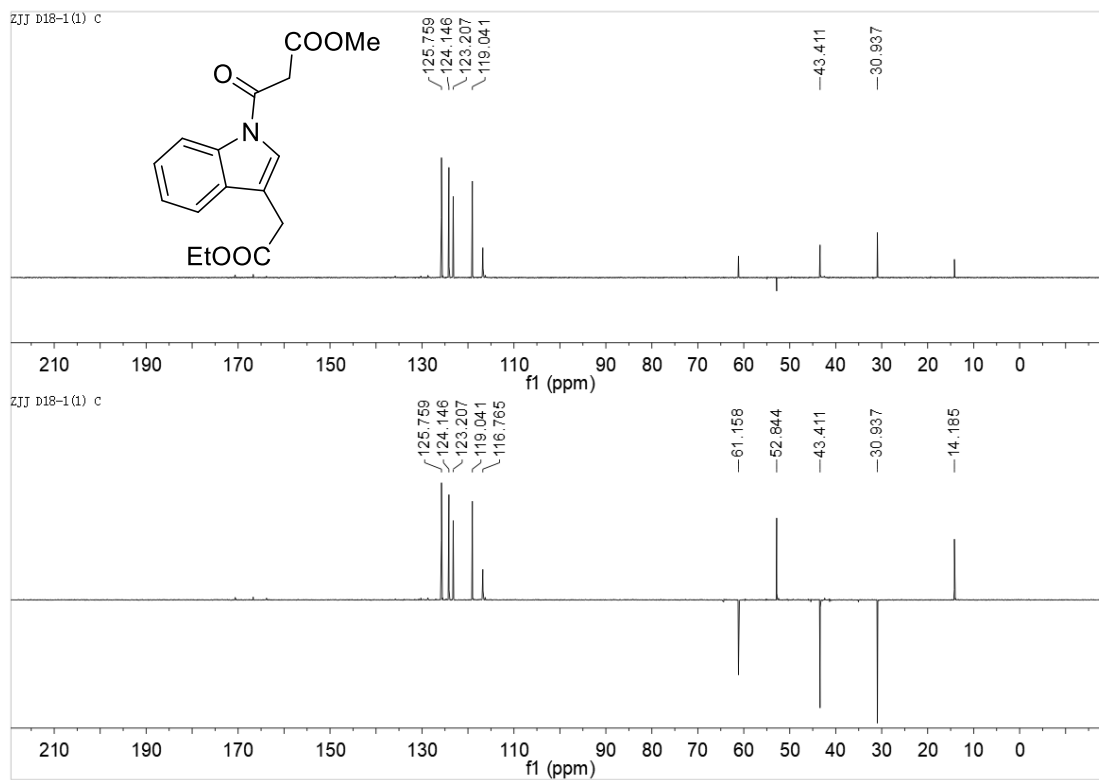

## IX. References

1. D. V. Patil, M. A. Cavitt, P. Grzybowski, S. France, *Chem. Commun.*, **2011**, 47, 10278–10280.
2. F.-F. Yang, M.-S. Shuai, X. Guan, M. Zhang, Q.-Q. Zhang, X.-Z. Fu, Z.-Q. Li, D.-P. Wang, M. Zhou, Y.-Y. Yang, T. Liu, B. He, Y.-L. Zhao, *RSC Adv.*, **2022**, 12, 25068–25080.
3. H.-J. Ai, F. Zhao, X.-F. Wu, *Chin. J. Catal.*, **2023**, 47, 121–128.
4. M. Zhang, F. Yang, X. Guan, M. Shuai, Q. Zhang, X. Fu, Y. Yang, M. Zhou, B. He, Y. Zhao, *Eur. J. Org. Chem.*, **2023**, 26, e202300159.
